# Supplementary material for: A Genome-Wide Perspective of miRNAome in Response to High Temperature, Salinity and Drought Stresses in Brassica juncea (Czern) L
Source: PLoS One. 2014 Mar 26;9(3):e92456. doi: 10.1371/journal.pone.0092456 (PMC3966790; doi:10.1371/journal.pone.0092456)
Supplement: Figure S1 — Size distribution of the putative small RNA population. Following elimination pipeline both the redundant (represented by striped bars) and the unique (represented by black bars) small RNAs were analyzed for their length (X-axis) versus their absolute number (Y-axis). Most of the small RNAs are in the size range of 20–24 nucleotides. (XLSX) [file pone.0092456.s001.xlsx]

## Sheet: Figure S1
Figure S1: Size distribution of the putative small RNA population. Following elimination pipeline both the redundant (represented by striped bars) and the unique (represented by black bars) small RNAs were analyzed for their length (X-axis) versus their absolute number (Y-axis). Most of the small RNAs are in the size range of 20-24 nucleotides.
