# Supplementary material for: A Genome-Wide Perspective of miRNAome in Response to High Temperature, Salinity and Drought Stresses in Brassica juncea (Czern) L
Source: PLoS One. 2014 Mar 26;9(3):e92456. doi: 10.1371/journal.pone.0092456 (PMC3966790; doi:10.1371/journal.pone.0092456)
Supplement: Figure S2 — Digital gene expression was used to categorize both (A) conserved and (B) novel miRNAs that were responsive to high temperature (BJH), salinity (BJS) and drought stress (BJD). The number of miRNAs that were regulated exclusively or by more than one stress condition has been presented. (XLSX) [file pone.0092456.s002.xlsx]

## Sheet: Figure S2
Figure S2: Digital gene expression was used to categorize both (A) conserved and (B) novel miRNAs that were responsive to high temperature (BJH), salinity (BJS) and drought stress (BJD). The number of miRNAs that were regulated exclusively or by more than one stress condition has been presented.
