# Supplementary material for: A Genome-Wide Perspective of miRNAome in Response to High Temperature, Salinity and Drought Stresses in Brassica juncea (Czern) L
Source: PLoS One. 2014 Mar 26;9(3):e92456. doi: 10.1371/journal.pone.0092456 (PMC3966790; doi:10.1371/journal.pone.0092456)
Supplement: Figure S4 — Overlap of conserved miRNAs identified in B. juncea with previously reported miRNAs in A. thaliana and A. lyrata . (XLSX) [file pone.0092456.s004.xlsx]

## Sheet: Figure S4
Figure S4: Overlap of conserved miRNAs identified in B. juncea with previously reported miRNAs in A. thaliana and A. lyrata.
