# Supplementary material for: A Genome-Wide Perspective of miRNAome in Response to High Temperature, Salinity and Drought Stresses in Brassica juncea (Czern) L
Source: PLoS One. 2014 Mar 26;9(3):e92456. doi: 10.1371/journal.pone.0092456 (PMC3966790; doi:10.1371/journal.pone.0092456)
Supplement: Table S2 — The total number of purity filtered sRNA reads obtained through high-throughput sequencing and the number of sRNA reads having adapter sequence both in redundant and unique datasets. (XLSX) [file pone.0092456.s006.xlsx]

## Sheet: Table S2
Table S2: Purity filtered sRNA reads obtained through sequencing were searched for any contamination of adapter sequence . Total number of purity filtered reads
and the number with percentage of sRNA reads with adapter sequence, both in redundant and unique datasets, were indicated.
	Category	Raw	Unique
	Total number of tags	25065874	12642620
	Tags With adapter sequence	21124605	8846899
	Percentage of tags with adapter sequence	84.2764	69.9768
