# Supplementary material for: A Genome-Wide Perspective of miRNAome in Response to High Temperature, Salinity and Drought Stresses in Brassica juncea (Czern) L
Source: PLoS One. 2014 Mar 26;9(3):e92456. doi: 10.1371/journal.pone.0092456 (PMC3966790; doi:10.1371/journal.pone.0092456)
Supplement: Table S3 — Conserved miRNA sequences identified in B. juncea with their absolute counts, normalized counts and fold change values in control and different abiotic stress conditions. (XLSX) [file pone.0092456.s007.xlsx]

## Sheet: Table S13
Table S13: The putative small RNA population of B. juncea was mapped separately to B. juncea draft genome, B. rapa genomic resources and genomic resources of other Brassica species.
The number and percentage of small RNA tags mapped onto different datasets were indicated.
	Genomic resource	Input (putaive small RNAs)	Mapped population	Mapping percentage
	Brassica juncea	8371367	2395756	28.6185
	Brassica rest	8371367	928622	11.0928
	Brassica rapa	8371367	1505386	17.9826
