# Supplementary material for: A Genome-Wide Perspective of miRNAome in Response to High Temperature, Salinity and Drought Stresses in Brassica juncea (Czern) L
Source: PLoS One. 2014 Mar 26;9(3):e92456. doi: 10.1371/journal.pone.0092456 (PMC3966790; doi:10.1371/journal.pone.0092456)
Supplement: Table S4 — Precursor sequences of conserved miRNAs. (XLSX) [file pone.0092456.s008.xlsx]

## Sheet: Table S4
Table S4: Precursor sequences of conserved miRNAs.
Precursors in B. juncea
ID	Locus	miRNA sequence	miRNA*	Hairpin Sequence	Start	End	Orientation	Total abundance	sRNA length	Hairpin Length	Hairpin Start	Hairpin End	Hairpin Structure	Minimum Free Energy(MFE)	Adjusted MFE	Hairpin G/C%	miRNA* Start Coord	miRNA* End Coord	P_Val
Bju-miR171_1	NODE_534987_length_469_cov_2.897655	UGAUUGAGCCGCGUCAAUAUC	UAUUGGCCUGGUUCACUCAGA(6)	AGAGAGUCCUCUUUGAUAUUGGCCUGGUUCACUCAGAUCUUCCCGACCACUCCACGCACAAGAUUAUCUGAUUGAGCCGCGUCAAUAUCUCAGUGCUCUCU	436	456	+ [Positive strand]	2410	21	101	367	467	((((((..((....(({{{{{{{={{{{{{{={{{{{(..((...................))..)))>>>->>>>>>>->>>>>>>>>..))..))))))	-38.91	-38.5248	48.5149	383	404	0.009901
Bju-miR395_3	NODE_6588133_length_172_cov_1.470930	CUGAAGUGUUUGGAGGAACUC	NO	GAGUUCCUUCGAACACUUCAUUGAGAAAACUGUCAAUAAUUUCCUUACUGAAGUGUUUGGAGGAACUC	72	92	- [Negative strand]	22	21	68	71	138	((((((((((((((((((((.((((.(((.((....)).))).))))->>>>>>>>>>>>>>>>>>>>	-33.2	-48.8235	38.2353	-1	-1	0.009901
Bju-miR164_2	NODE_831666_length_241_cov_2.485477	UGGAGAAGCAGGGCACGUGCG	GCACGUGUUCUACUACUCCAAC(1) CACGUGUUCUACUACUCCAAC(6)	UGGAGAAGCAGGGCACGUGCGAGCAAAUGAGAUCGAUCUAUAUAUAUAUAUAUAUUGAUCAUAUUUUCGCACGUGUUCUACUACUCCA	90	110	+ [Positive strand]	728	21	88	89	176	<<<<<-<<-<<<<<<<<<<<<(..(((((.(((((((.(((((....))))).))))))).)))))))))))))))))).)).)))))	-41.9	-47.6136	38.6364	158	177	0.009901
Bju-miR160_1	NODE_1460871_length_528_cov_2.729167	UGCCUGGCUCCCUGUAUGCCA	AUGGCGUAUGAGGAGCCAAGC(8) AUGGCGUAUGAGGAGCCAAG(2) UGGCGUAUGAGGAGCCAAGCA(2) GCGUAUGAGGAGCCAAGCAU(3) GCGUAUGAGGAGCCAAGCAUA(78) GCGUAUGAGGAGCCAAGCAUAA(3)	UAUGCCUGGCUCCCUGUAUGCCAUACACUAAGUUCAUCGAUCCUCGGCGACCUCCGUGGAUGGCGUAUGAGGAGCCAAGCAUA	197	217	- [Negative strand]	1797	21	83	136	218	((<<<-<<<<<<<--<<<<<<<<(.(((..((.((..((.....))..)).))..))).)))}}}}}}==}}}}}}}=}}}}}	-42.4	-51.0843	54.2169	135	155	0.009901
Bju-miR168_1	NODE_1456211_length_181_cov_5.690608	UCGCUUGGUGCAGGUCGGGAA	NO	UUCGCUUGGUGCAGGUCGGGAACCAAUUGUCUGACACAUCCACGAAGUUUUACUUGCUGGUUUGUGAGCAGGGAUUGGAUCCCGCCUUGCAUCAAUUGAA	183	203	- [Negative strand]	19357	21	100	104	203	(<<<-<<<<<<<<<<-<<<<<-((((((.((((.((((.(((..(((.....)))..)))..))))..)))))))))).))))).)))))))))).))))	-44.9	-44.9	49	-1	-1	0.009901
Bju-miR164_1	NODE_1623615_length_254_cov_2.232283	UGGAGAAGCAGGGCACGUGCA	CAUGUGCCCAUCUUCCCCAUC(2)	AAGGUGUGCUGAGCAAGAUGGAGAAGCAGGGCACGUGCAUUACUAACUCAUCUCUUAGUCCACGUAUAUACACUCUCCCCAAAUGCGUGUAUAUGAUAGAGAUGUGUGUGAAGUGUGUUGAGUUAGUUCUUCAUGUGCCCAUCUUCCCCAUCAUGACCACUUCACCUU	215	235	- [Negative strand]	2173	21	168	85	252	((((((...((..((.((<<<-<<<<--<<<<<<<<<--..(((((((((.(.(((.(..(((((((((((((.(.........).)))))))).......)))))..).))).)...)))))))))....}}}}}}}}}==}}}}=}}}}}.))..))...))))))	-64.31	-38.2798	45.2381	100	120	0.009901
Bju-miR394_1	NODE_1758398_length_221_cov_2.760181	UUGGCAUUCUGUCCACCUCC	AGGUGGGCAUACUGCCAACA(1)	ACAGAGAUCUUUGGCAUUCUGUCCACCUCCCCUUUCUAUAUAUAUGUUUAUUAUCUUCAUCGUGUUUUGUGAGGGGGAGGUGGGCAUACUGCCAACAGAGAUCUGU	116	135	- [Negative strand]	184	20	106	39	144	(((((..(((<<<<<<-<-<<<<<<<<<<<(((((.((...(((((..............)))))..)).)))))))}}}}}}}}}=}=}}}}}}=}))..)))))	-50.24	-47.3962	43.3962	47	66	0.009901
Bju-miR156_4	NODE_1923199_length_179_cov_2.865922	UUGACAGAAGAAAGAGAGCAC	NO	AUGUUGACAGAAGAAAGAGAGCACAAGCCGGGAUUAGCAAAAAGAGAGUUUUGCCCUUGUCGGGAGUGUGCUCUCUUUACUUCUGCCACCAU	66	86	+ [Positive strand]	159	21	92	62	153	(((-<<-<<<<<<<<<<<<<<<<<(..((.((....((((((......)))))).....)).))..)))))))))))).)))))).)).)))	-41.5	-45.1087	46.7391	-1	-1	0.009901
Bju-miR165_1	NODE_1950397_length_363_cov_2.696970	UCGGACCAGGCUUCAUCCCCC	GGAAUGUUGUCUGGAUCGAGG(19) GGAAUGUUGUCUGGAUCGAGGA(12)	GUUGAGGGGAAUGUUGUCUGGAUCGAGGAUAUUAUAUAUACACAGAUACGUAUAUAUGUUGAUACAAGUGAUUUUGAUCAUAUAUGUAUAUAGACUAUUCUCGGACCAGGCUUCAUCCCCCCUAAC	138	158	- [Negative strand]	8663	21	126	132	257	((((.(({{={{{=={{{{{{={{{{{{(((...((((((((.......((((........))))..(((((....)))))...))))))))...)))))>>>>->>>>>>-->>>->>>>.))))	-46.2	-36.6667	37.3016	229	249	0.009901
Bju-miR395_1	NODE_2097255_length_299_cov_2.692308	CUGAAGUGUUUGGGGGAACUC	GUUCCUCUGAGCACUUCAUUG(3) UUCCUCUGAGCACUUCAUUGG(1)	UGUCGGAUGUUUCCUAGAGUUCCUCUGAGCACUUCAUUGGAGAUACCGUUUAUUUUCUAUCAAAAUGUAUUCCACUGAAGUGUUUGGGGGAACUCCUGGACUCAUCCGGUA	181	201	+ [Positive strand]	150	21	111	106	216	(..((((((..(((..(({{{{{{{=={{{{{{{{{={{(((.(((.((((...........))))))))))))->>>>>>>>>-->>>>>>>>>..)))..))))))..)	-55.5	-50	43.2432	124	145	0.009901
Bju-miR171_3	NODE_2199701_length_224_cov_2.741071	UGAUUGAGCCGUGCCAAUAUC	NO	GAUAUUGGUGUGGUUCAAUCAGAAAACCACACUCUUUUGUUGUAGAGAUCGGUUUGUUUGAUUGAGCCGUGCCAAUAUC	69	89	- [Negative strand]	31	21	79	68	146	((((((((..((((((((((((((((((...((((........))))...))))).))>>>>>>>>>>>-->>>>>>>>	-40.6	-51.3924	40.5063	-1	-1	0.009901
Bju-miR399_1	NODE_2290834_length_186_cov_3.139785	UGCCAAAGGAGAGUUGCCCUG	NO	GUAAUAGGGCAUCUUUCUAUUGGCACGCGACUAUGCAAUUUGCUCUUUUGUGUUCUUGGUAGCUUAUUGGCUUUGUCACUUGCCAAAGGAGAGUUGCCCUGUCAC	82	102	+ [Positive strand]	6	21	105	1	105	((.((((((((.((((((.((((((.(.(((...(((((..(((((...(....)..)).)))..))).))...))).).>>>>>>->>>>>>->>>>>>>).))	-41.9	-39.9048	44.7619	-1	-1	0.009901
Bju-miR157_1	NODE_2273798_length_394_cov_2.690355	UUGACAGAAGAUAGAGAGCAC	NO	UUGACAGAAGAUAGAGAGCACAGAUGAUGAGAUGCAAUUUGGAGCAGCUUCUAUGCAUCCUACUCCUUUGUGCUCUCUAGUCUUCUGUCA	200	220	- [Negative strand]	57062	21	89	130	218	<<<<<<<<<<<<<<<<<<<<(((.((((.((((((...(((((....))))))))))).)).)).)))))))))))).)))))))))))	-41.9	-47.0787	43.8202	-1	-1	0.009901
Bju-miR156_1	NODE_3218402_length_201_cov_2.417910	UGACAGAAGAGAGUGAGCAC	UGCUCACGGCUCUUUCUGUC(1)	ACUGACAGAAGAGAGUGAGCACAUGCAGGCACUGUUAUGUCUCCAUAACUUUGCGUGUGCGUGCUCACGGCUCUUUCUGUCAGU	203	222	- [Negative strand]	1019607	20	84	140	223	((<<<<<<<<<<<-<<<<<<<<..(((.(((..((((((....))))))..))).)))..)}}}}}}}==}}}=}}}}}}})))	-49.3	-58.6905	50	142	161	0.009901
Bju-miR319_2	NODE_3454402_length_187_cov_2.684492	UUGGACUGAAGGGAGCUCCUU	AGAGCUUUCUUUGGUCCACUC(1) GAGCUUUCUUUGGUCCACUC(2) AGAGCUUUCUUUGGUCCACUCA(1)	GAUCUAGAGAGCUUUCUUUGGUCCACUCAUGGAGUAAUAUGUGAGAUUUAAUUGACUCUCGACUCAUUCAUCCACAUACCAAAUGAAAGAAUAUGUUCCCAUAUGGUAAAUGAAUAAAUGAUUCUAGAGACAAAUUGAAUCUUCACUUCUCUAUGCUUGGACUGAAGGGAGCUCCUUUUC	28	48	- [Negative strand]	13	21	180	24	203	((...((.{{{{{=={{{=={{{{{=={((((((......(((((((((((((..((((.((.(((((.((.((..(((((.(((...(((....))).))).)))))..)).)).))))).)).))))...))))))))).))))..))))))).->>>>>-->>>-->>>>>>>-.))	-67.3	-37.3889	36.6667	175	194	0.009901
Precursors in B. rapa
Bju-miR165_1	gi|339949617|gb|AENI01008970.1|_Brassica_rapa_Chr10_240	UCGGACCAGGCUUCAUCCCCC	GGAAUGUUGUCUGGAUCGAGG(19) GGAAUGUUGUCUGGAUCGAGGA(12)	AGGGGAAUGUUGUCUGGAUCGAGGAUAUUAUAUAUACACAAAUAUGUAUAUAUAUGUUAAUAUCAGUGUUUGAUCAUAUAUAUGUAUAUAGAUUAUUCUCGGACCAGGCUUCAUCCCCCCU	42291	42311	- [Negative strand]	8663	21	121	42288	42408	((({{={{{=={{{{{{={{{{{{(((...((((((((..........((((((((((((.........)))).))))))))))))))))...)))))>>>>->>>>>>-->>>-->>>))	-44.9	-37.1074	33.0579	42384	42404	0.009901
Bju-miR169_3	gi|339949968|gb|AENI01008619.1|_Brassica_rapa_Chr9_1389	UAGCCAAGGAUGACUUGCCUG	NO	GAGAAGUUGUGUGGUAGCCAAGGAUGACUUGCCUGCGUCUUAAACCAUCUCUAUCAAAGACUAAAUAAAGAUCGAUAGUCUUUGAUAAAUUGGUUAAUAGUUAGGCAGUCUCCUCGGCUAUUCAGACAAUUCUC	9014	9034	+ [Positive strand]	465	21	134	8999	9132	(((((.((((.(((<<<<<-<<<<-<<<<-<<<<<...((..(((((....((((((((((((............))))))))))))...)))))...)).))))))))))))).))))).))).)))))))))	-55.7	-41.5672	39.5522	-1	-1	0.009901
Bju-miR156_1	gi|339950021|gb|AENI01008566.1|_Brassica_rapa_Chr9_1336	UGACAGAAGAGAGUGAGCAC	UGCUCACUGCUCUUUCUGUCA(1) GCUCACUGCUCUUUCUGUCAG(3)	GAAACUGACAGAAGAGAGUGAGCACACAAAAGUAAAUUGCAUAUGUUGCAUUUGCUUCUCUUGCGUGCUCACUGCUCUUUCUGUCAGAUUC	8665	8684	+ [Positive strand]	1019607	20	91	8659	8749	(((.(<<<<<<<<<<<<<<<<<<<<.(((((((((((.(((.....)))))))))))...))).))}}}}}}}=}}}=}}}}}}}}}.)))	-46.4	-50.989	41.7582	8725	8746	0.009901
Bju-miR166_1	gi|339950044|gb|AENI01008543.1|_Brassica_rapa_Chr9_1313	UCGGACCAGGCUUCAUUCCCC	GGGGACUGUUGUCUGGCUCGAG(1) GGACUGUUGUCUGGCUCGAG(14) GGACUGUUGUCUGGCUCGAGG(94) GGACUGUUGUCUGGCUCGAGGA(13) GACUGUUGUCUGGCUCGAGGA(3)	UUGAGGGGACUGUUGUCUGGCUCGAGGACUCUUAUUCUAACUCAAUCACGUUUUAUAAAAUCUACUUGAUCUGAUGAUUGAUUAGGGUUUUAGUGUCUUCGGACCAGGCUUCAUUCCCCCCAA	4545	4565	+ [Positive strand]	47450	21	123	4446	4568	(((.(({{{={{=={{{{{{=={{{{{((.((.(((((((.(((((((((..(((...........)))..)).))))))))))))))...)).))))>>>-->>>>>>-->>->>>>>.)))	-50.4	-40.9756	42.2764	4452	4473	0.009901
Bju-miR393_1	gi|339950103|gb|AENI01008484.1|_Brassica_rapa_Chr9_1254	UCCAAAGGGAUCGCAUUGAUCC	AUCAUGCGAUCUAUUUGGAUU(4)	AGCAACUAGAGAAAGGAUCCAAAGGGAUCGCAUUGAUCCUAAUUAAGCUGAAUUUAUUCCCAAAUAAUUGUUAUAUUUUUCUCAAUCUAAAGAAAAAGUCCCAAAAAUCUGCUUCGUUUUCAGGAUCAUGCGAUCUAUUUGGAUUCAUCCUUUGGUUGCU	15368	15389	+ [Positive strand]	151	22	160	15350	15509	(((((((((((...(((<<<<<<-<<<<<<<<<-<<<<<((((.((((.((..(((((....)))))........(((((((........)))))))..........)).)))).)))...)))}}}}}}}}}}}}=}}}}}}}})...)))))))))))	-56.9	-35.5625	34.375	15474	15495	0.009901
Bju-miR160_1	gi|339950689|gb|AENI01007898.1|_Brassica_rapa_Chr9_668	UGCCUGGCUCCCUGUAUGCCA	GCGUACGAGGAGCCAAGCAU(1) GCGUACGAGGAGCCAAGCAUG(67) CGUACGAGGAGCCAAGCAUG(5) GCGUACGAGGAGCCAAGCAUGA(4)	UCAUGCCUGGCUCCCUGUAUGCCACAAGUGGGUAUCGAUUUUGUUAAAAAAUUGGCUGCUGGUGGCGUACGAGGAGCCAAGCAUGA	22148	22168	+ [Positive strand]	1797	21	86	22144	22229	(((<<<-<<<<<<<-<<<<<<<<<(.((..(...((((((((.....)))))))))..)).)))}}}}}}}=}}}}}}}=}}}}})	-49.2	-57.2093	50	22208	22229	0.009901
Bju-miR167_2	gi|339950813|gb|AENI01007774.1|_Brassica_rapa_Chr9_544	UGAAGCUGCCAGCAUGAUCUU	GAUCAUGUGGCAGUUUCACC(2)	UGAAGCUGCCAGCAUGAUCUUAACUUCUCUCUCUAUAUAUUAUAUAUGUAGAUUUGAUCAGGGAAGAUCAGAUCAUGUGGCAGUUUCA	8876	8896	+ [Positive strand]	223	21	88	8875	8962	<<<<<<<<<<<-<<<<<<<<-..(((((((.(((((((((...))))))))).......)))))))...)))))))))))))))))))	-40	-45.4545	36.3636	8945	8963	0.009901
Bju-miR168_1	gi|339950851|gb|AENI01007736.1|_Brassica_rapa_Chr9_506	UCGCUUGGUGCAGGUCGGGAA	CCUGCCUUCCAUCAACUGAAU(1)	CUCGGAUUCGCUUGGUGCAGGUCGGGAACUGAUUGGCUGACACCGCCACGUGGGUUUUCACGGUUGGCUUGUGAGCAGGGAUCGGAUCCUGCCUUCCAUCAACUGAAUCGGAG	20375	20395	+ [Positive strand]	19357	21	113	20367	20479	(((.(((<<<-<<<<<<-<<<-<<<<<-((((((.(((.(((..(((((((((....)))))..)))).))).)))...)))))).)}}}}}}}==}}}}}}=}}}}}).)))	-52.1	-46.1062	57.5221	20454	20475	0.009901
Bju-miR399_1	gi|339951264|gb|AENI01007323.1|_Brassica_rapa_Chr9_93	UGCCAAAGGAGAGUUGCCCUG	NO	AGCAGUAAUAGGGCAUCUUUCUAUUGGCACGAGACAGUGAGAUGUGCUCUUUUUUUUGUGUGUGUUCAUGGCUACUUGGCUCUGUCACUUGCCAAAGGAGAGUUGCCCUGUCACUGCU	191844	191864	+ [Positive strand]	6	21	118	191754	191871	((((((.((((((((.((((((.((((((.(.(((((...((((..(.(........).)..))))...((((....))))))))).).>>>>>>->>>>>>->>>>>>>).))))))	-51.9	-43.983	46.6102	-1	-1	0.009901
Bju-miR164_2	gi|339951283|gb|AENI01007304.1|_Brassica_rapa_Chr9_74	UGGAGAAGCAGGGCACGUGCG	GCACGUGUUCUACUACUCCAAC(1) CACGUGUUCUACUACUCCAAC(6)	GGGUGAGUAACACUUGCUGGAGAAGCAGGGCACGUGCGAACUAAUGAGAGAUCUGUGCAUGUUGAUCAUAUUUUUGCACGUGUUCUACUACUCCAACACGUGUGUCUCUCCC	18945	18965	- [Negative strand]	728	21	112	18870	18981	(((.(((..((((.((.<<<<<-<<-<<<<<<<<<<<<((...((((..(((........)))..))))...))))}}}}}}}}}}=}}=}}}}}=}).))))..))).)))	-49.1	-43.8393	48.2143	18884	18904	0.009901
Bju-miR169_1	gi|339951300|gb|AENI01007287.1|_Brassica_rapa_Chr9_57	CAGCCAAGGAUGACUUGCCGG	UGGCAAGUUGCCCUUCGGCUAC(3) GGCAAGUUGCCCUUCGGCUACA(2)	GGAGUAGAUUUGCAUGAAGUGGAGUAGAGUAUAAUGCAGCCAAGGAUGACUUGCCGGAGGGUCGUUCAUCAUGCAUAAUAAUAUUGGUGAUGAACAUAAUUCUGGCAAGUUGCCCUUCGGCUACAUUUUGCUCUCUUCUACUCAUGCAAACUCUCC	25819	25839	+ [Positive strand]	316	21	156	25782	25937	((((.((.(((((((((.((((((.((((((.((((-<<<<<<<<--<<<<<<<<<<((....(((((((((.((.........)))))))))))....)))}}}}}}}}}==}}}}=}}}}=}))).)))))).)))))))))))))))))))))	-80.5	-51.6026	43.5897	25884	25906	0.009901
Bju-miR395_2	gi|339951427|gb|AENI01007160.1|_Brassica_rapa_Chr8_729	CUGAAGUGUUUGGGGGGACUC	GUUCCCUUUAACGCUUCAUUG(1)	GCCCCCAUGAGUUCCCUUUAACGCUUCAUUGUGAUUACUCCAGUCACAUUUAUUUUUCUUAAAUGUUUGGUCGAUUUUUGUAUACAACACUGAAGUGUUUGGGGGGACUCGUGGUGC	6860	6880	+ [Positive strand]	50	21	117	6770	6886	((..(((((({{{{{{{=={{{{{{{{{={{(...(((.((((..(((((((.......))))))))))).........)))....)))->>>>>>>>>-->>>>>>>>>)))).))	-46.8	-40	41.8803	6780	6801	0.009901
Bju-miR395_1	gi|339951427|gb|AENI01007160.1|_Brassica_rapa_Chr8_729	CUGAAGUGUUUGGGGGAACUC	GUUCCUCUGAGCACUUCAUUG(3) UUCCUCUGAGCACUUCAUUGG(1)	UCCUAGAGUUCCUCUGAGCACUUCAUUGGGUAUACAAUUUCUUAUGAAGAUUACCCACUGAAGUGUUUGGGGGAACUCCUGGA	5589	5609	- [Negative strand]	150	21	83	5583	5665	(((..(({{{{{{{=={{{{{{{{{={{((((.....((((....))))..))))))->>>>>>>>>-->>>>>>>>>..)))	-46.6	-56.1446	43.3735	5637	5657	0.009901
Bju-miR828_1	gi|339951507|gb|AENI01007080.1|_Brassica_rapa_Chr8_649	UCUUGCUUAAAUGAGUAUUCCA	NO	UCUUGCUUAAAUGAGUAUUCCAUGGAAGGGAUUCACUCACAUCAAUAAUAGACCUAAUAUGAGUGGAUUUCUCUUCAUGAGGUGCUCAUUUGAGCAAG	17763	17784	- [Negative strand]	22	22	97	17686	17782	<<<<<<<<<<<<<<<<<--<<((((((..(((((((((....................)))))))))..)).))))))..)))))))))))))))))	-46.75	-48.1959	38.1443	-1	-1	0.009901
Bju-miR396_1	gi|339951752|gb|AENI01006835.1|_Brassica_rapa_Chr8_404	GCUCAAGAAAGCUGUGGGAAA	UUCCACAGCUUUCUUGAACUU(5)	AGAUCCUGGUUAUAUUUUUCCACAGCUUUCUUGAACUUUCUUUUUCAUUUCCCUUAUUUUAGAGCCAAAAUAACUAAAAAUCUCUAACAUUUAACACUCUAGAAAAAAAAAAGCUCAAGAAAGCUGUGGGAAAACAUGACAAUUCAGGGUUU	22448	22468	- [Negative strand]	684	21	152	22428	22579	(((((((((((((.((({{{{{{{{{{{{{{{{{={{{(.((((((.........((.((((((.................)))))).))...........))))))..)))>->>>>>>>>>>>>>>>>>>>).)))))....))))))))	-48.98	-32.2237	30.9211	22541	22561	0.009901
Bju-miR169_4	gi|339952135|gb|AENI01006452.1|_Brassica_rapa_Chr8_21	UGAGCCAAAGAUGACUUGCCG	NO	UGAGCCAAAGAUGACUUGCCGAUUUUACCGAUGGAUUAAUCUAAACUGAUAUUGGUAGUCGGCAAGUAGACUUUGGCUC	1401	1421	- [Negative strand]	95	21	78	1342	1419	<<<<<<<<<---<<<<<<<<((..((((((((................))))))))))))))))))...)))))))))	-37.49	-48.0641	42.3077	-1	-1	0.009901
Bju-miR394_1	gi|339952200|gb|AENI01006387.1|_Brassica_rapa_Chr7_700	UUGGCAUUCUGUCCACCUCC	NO	UUGGCAUUCUGUCCACCUCCUUUCUGAAUAUAUUUGUGUAUAAGUGUACGCAACUACGUUGUGUUUUGUGUGAGGAGGUGGGCAUACUGCCAA	38017	38036	+ [Positive strand]	184	20	93	38016	38108	<<<<<<-<-<<<<<<<<<<<((.(.(((((((.((((((((....))))))))......)))))))...).))))))))))))).).))))))	-41.4	-44.5161	43.0108	-1	-1	0.009901
Bju-miR858_1	gi|339952232|gb|AENI01006355.1|_Brassica_rapa_Chr7_668	UUCGUUGUCUGUUCGACCUUG	NO	GUGGUUGGGUUCGAUGCUAGGCUUGUCAAAGUGAGCAAUCUUAUUUGUUCUCAUCUUUGUUUCGUUGUCUGUUCGACCUUGGCCUC	57451	57471	- [Negative strand]	27	21	86	57445	57530	(.(((..((.((((.((.((((.((.(((((.((((((......))))))....))))).-->>-->>>>>>>>>>->>--))).)	-28.2	-32.7907	45.3488	-1	-1	0.009901
Bju-miR157_1	gi|339952260|gb|AENI01006327.1|_Brassica_rapa_Chr7_640	UUGACAGAAGAUAGAGAGCAC	GCUCUCUAGUCUUCUGUCAUC(25) GCUCUCUAGUCUUCUGUCAUCA(6)	AGUGUUGACAGAAGAUAGAGAGCACAGAUGAUGAGAUGCAAUUUGGAGCAGCUUGUAUGCAUCGUACUCCUUUGUGCUCUCUAGUCUUCUGUCAUCACU	56135	56155	+ [Positive strand]	57062	21	99	56130	56228	((((-<<<<<<<<<<<<<<<<<<<<(((.((...((((((....((.....))....))))))....)).)))))}}}}}}}=}}}}}}}}}}}=})))	-49.9	-50.404	43.4343	56205	56226	0.009901
Bju-miR159_1	gi|339952310|gb|AENI01006277.1|_Brassica_rapa_Chr7_590	UUUGGAUUGAAGGGAGCUCUA	NO	GUAGGGCUCCUUAUAGUUCAAACGAGAGUUUAGCAGGGUAAAGAAAAGCUGCUAAGCUAUGAAUCCCAUAAGCCCUAAUCCUUAUAUAUAAAAAGGAUUUGGUUAUAUGGCUUACAUAUCUCAGGAGCUUUAACUUGCCCUUUAAUUGCUUUUACUCUUCUUUGGAUUGAAGGGAGCUCUAC	85665	85685	+ [Positive strand]	591	21	182	85504	85685	((((((((((((.(((((((((.((((((..((((((((((...((((((.((.((.((((.(..(((((((((..(((((((.........))))))).)))).)))))..).)))).)).)).))))))...))))))......))))...)))))).>>>>>>>>>->>>>>>>>>>>)	-75.9	-41.7033	37.9121	-1	-1	0.009901
Bju-miR395_3	gi|339952534|gb|AENI01006053.1|_Brassica_rapa_Chr7_366	CUGAAGUGUUUGGAGGAACUC	NO	GAGUUCCUUCGAACACUUCACUGAAAAACCUGUCAAUAAUUUUUUUUACUGAAGUGUUUGGAGGAACUC	1425	1445	- [Negative strand]	22	21	69	1424	1492	((((((((((((((((((((.(((((((.............)))))))->>>>>>>>>>>>>>>>>>>>	-33.42	-48.4348	36.2319	-1	-1	0.009901
Bju-miR156_3	gi|339952861|gb|AENI01005726.1|_Brassica_rapa_Chr7_39	CGACAGAAGAGAGUGAGCAC	NO	GGAAGGCGACAGAAGAGAGUGAGCACACAUGGCUCCCUUUUUUCUAGCAUGCUCAUGCAAGAAAGCUCUGCGUGCUCACCCUCUUCUUGUCUCCUUCU	24847	24866	+ [Positive strand]	959	20	98	24840	24937	((((((-<<<<<<<<<<-<<<<<<<<.((.((((.......((((.((((....)))).)))))))).)).)))))))).)))))).)))).))))))	-50.71	-51.7449	51.0204	-1	-1	0.009901
Bju-miR158_1	gi|339953953|gb|AENI01004634.1|_Brassica_rapa_Chr5_909	UCCCAAAUGUAGACAAAGCA	NO	ACGUCUUCUCGGUAUUUCUUUGUCUAUAUUCUUGGAAAAAGCGAUGAGGUCUCGUUGCACUUUCCCAAAUGUAGACAAAGCAAAACCGCGAUGACGU	38677	38696	+ [Positive strand]	77	20	97	38614	38710	(((((.((.((((.((.(((((((((((((...(((((..(((((((....)))))))..))>>>-->>>>>>>>>>>>>->).)))).)).)))))	-43.9	-45.2577	42.268	-1	-1	0.009901
Bju-miR169_2	gi|339953977|gb|AENI01004610.1|_Brassica_rapa_Chr5_885	CAGCCAAGGAUGACUUGCCGA	NO	CAGCCAAGGAUGACUUGCCGAUUUAAAAUAUCUGAUAAGUAUUUUGUUUCGUAUUUUAAAGAAAAAAAAUCAUGAUCGGCAAGUUGUCCUUGGCU	45160	45180	+ [Positive strand]	342	21	94	45160	45253	<<<<<<<<<--<<<<<<<<<((((((((((..((((((...))))))..))))))))..((.......))..)))))))))))..)))))))))	-41.8	-44.4681	32.9787	-1	-1	0.009901
Bju-miR167_1	gi|339954213|gb|AENI01004374.1|_Brassica_rapa_Chr5_649	UGAAGCUGCCAGCAUGAUCUA	NO	UGAAGCUGCCAGCAUGAUCUAAUUAUCUUUCUUUCUCCGUUGACGAUGGAAAAGACAUGAGUGUUGAUUAGAUCAUGUUCGCAGUUUCA	26727	26747	- [Negative strand]	12775	21	89	26658	26746	<<<<<<<<<-<<<<<<<<<<<((((.((((((((.((((((...)))))))))))...)))...))))))))))))))).)))))))))	-40.8	-45.8427	39.3258	-1	-1	0.009901
Bju-miR160_2	gi|339954380|gb|AENI01004207.1|_Brassica_rapa_Chr5_482	UCAAUGCACUGAAAGUGACUA	UCACUUUCAAUGCGUUGAUC(1)	UGCUUCGAUCAAUGCACUGAAAGUGACUACAUCAGCAUUUGUUUUUAAGCUUUCGCUCUCAUCUAUAUGAUGAAGAUGAAAAUUAGCCUCUGAUGUAGUCACUUUCAAUGCGUUGAUCAUAGCA	7373	7393	- [Negative strand]	422	21	124	7277	7400	((((..((<<<<<<<<-<<<<<<<<<<<<((((((.....(((((((.((....))..(((((.....)))))...)))))))......)))))))))}}}}}}}}}=}}}}}}}}}}..))))	-58.4	-47.0968	37.0968	7282	7301	0.009901
Bju-miR390_1	gi|339954749|gb|AENI01003838.1|_Brassica_rapa_Chr5_113	AAGCUCAGGAGGGAUAGCGCC	NO	AAGCUCAGGAGGGAUAGCGCCAUCAUAAUCUCAUUCACAUCGAUAUUUUUGGCGCUGUCCAUCCUGAGUU	1686	1706	- [Negative strand]	654	21	69	1636	1704	<<<<<<<<<-<<<<<<<<<<(.....(((...........))).....))))))))))).)))))))))	-35.8	-51.8841	46.3768	-1	-1	0.009901
Bju-miR164_1	gi|339954852|gb|AENI01003735.1|_Brassica_rapa_Chr5_10	UGGAGAAGCAGGGCACGUGCA	NO	GUUGGAGAAGCAGGGCACGUGCAAACCAACAAACACGAGAUCUAUCUCAUGUAAUUUGCACGUGCUCCACUCCUCCAAC	16714	16734	- [Negative strand]	2173	21	79	16657	16735	((<<<<<-<<--<<<<<<<<<<<((.......(((.((((....)))).)))..)))))))))))))..)).)))))))	-36.8	-46.5823	49.3671	-1	-1	0.009901
Bju-miR403_1	gi|339954843|gb|AENI01003744.1|_Brassica_rapa_Chr5_19	UUAGAUUCACGCACAAACUCG	ACAUGUUUUGUGCGUGAAUCUA(2) UACAUGUUUUGUGCGUGAAUCU(2) UACAUGUUUUGUGCGUGAAUC(1) UGUUUUGUGCGUGAAUCUAAU(2) UUACAUGUUUUGUGCGUGAAUC(6) UGUUUUGUGCGUGAAUCUAAUU(23) UUUUGUGCGUGAAUCUAAUU(1) UUACAUGUUUUGUGCGUGAA(2)	GAAGAGUCAUAUUACAUGUUUUGUGCGUGAAUCUAAUUCGUAUGCUCAUGUAGUAAUCCUAUCUUGUUGUUGGAUUAGAUUCACGCACAAACUCGUAAUCUGUCUUUUC	16640	16660	- [Negative strand]	574	21	109	16625	16733	((((((.((.(((((.={{{{={{{{{{{{{{{{{{{{((...((....((((.....))))...))...))))>>>>>>>>>>>>>>>>>>-->)))).)).))))))	-44.2	-40.5505	35.7798	16695	16716	0.009901
Bju-miR2111_3	gi|339949241|gb|AENI01009346.1|_Brassica_rapa_Chr10_616	UAAUCUGCAUCCUGAGGUUUA	NO	CUUGGUGAGGAACUGGUAAUCUGCAUCCUGAGGUUUAAAAACUCAUAGACAUGUAAAGCAAAUUGUAUACAUGAUUUUUAAUCCUCGGGACACAGAUUACCUCUUCCUUACUCGAG	161515	161535	- [Negative strand]	5	21	116	161435	161550	((((((((((((..((<<<<<<<--<<<<<<<<-<<<((((.((((..(((((.....))...)))....))))))))))).))))))))..)))))))))..)))))))).))))	-50.6	-43.6207	38.7931	-1	-1	0.009901
Bju-miR172_1	gi|339949249|gb|AENI01009338.1|_Brassica_rapa_Chr10_608	AGAAUCUUGAUGAUGCUGCAU	NO	GGUGCAGCACCAUUAAGAUUCACAUGGAAAUUGAAAAAAACCCUAAUUUAUAUUAAUUAGGGUUCUGAUAUGUAUAUGAGAAUCUUGAUGAUGCUGCAUC	38224	38244	+ [Positive strand]	2135	21	100	38145	38244	(((((((((.(((((((((((.((((...((.......((((((((((......)))))))))).....))...))))->>>>>>>>>>>->>>>>>>>)	-43	-43	33	-1	-1	0.009901
Bju-miR156_2	gi|339949276|gb|AENI01009311.1|_Brassica_rapa_Chr10_581	UGACAGAAGAGAGCGAGCAC	NO	UGACAGAAGAGAGCGAGCACACAAAGGGAGAAUUGUAUAAAAUUAAUAUGUAUACAGUUUACUUUUGCGUGCUCAUUCUCGUUCUGUCA	125789	125808	+ [Positive strand]	5034	20	89	125788	125876	<<<<<<<<<<<<<-<<<<<<.((((((..((((((((((...........)))))))))).)))))).)))))).))))).))))))))	-41.8	-46.9663	37.0787	-1	-1	0.009901
Bju-miR171_2	gi|339955972|gb|AENI01002615.1|_Brassica_rapa_Chr3_506	UGAUUGAGCCGCGCCAAUAUC	UAUUGGCCUGGUUCACUCAGA(6)	GCACGAAAGAGUCCUCUUUGAUAUUGGCCUGGUUCACUCAGAUCUUCCAGAUUACACACGUACUAUAUACAUUCUCUCAGUUAUCUGAUUGAGCCGCGCCAAUAUCUCAGUGCUCUCUCGUC	136197	136217	+ [Positive strand]	764	21	122	136111	136232	(.((((.((((..((....(({{{{{{{={{{{{{{={{{{{(((...(((.....................)))...))..)))>>>->>>>>>>->>>>>>>>>..))..)))).)))))	-41.7	-34.1803	45.082	136132	136153	0.009901
Bju-miR160_3	gi|339955992|gb|AENI01002595.1|_Brassica_rapa_Chr3_486	UCGAUAAACCUCUGCAUCCAG	UGGAGGCAGCGGUUCAUCGAU(14) UGGAGGCAGCGGUUCAUCGAUC(4) GGAGGCAGCGGUUCAUCGAUC(5)	CGCUGGAGGCAGCGGUUCAUCGAUCAAUUCCUGUGAAAAAUGAUGUUGGAAACAAUUUACAUGGGAAGCAUGAAUCGAUCGAUAAACCUCUGCAUCCAGUG	19375	19395	+ [Positive strand]	130	21	101	19296	19396	((({{{{={{{{={{{{={{{{{{(.((((.(((.....(((..((((....))))...))).....))).)))).))>>>>>->>>>->>>>->>>>>))	-47	-46.5347	44.5545	19299	19320	0.009901
Bju-miR2111_1	gi|339956145|gb|AENI01002442.1|_Brassica_rapa_Chr3_333	GUCCUCGGGAUGCGGAUUACC	UAAUCUGCAUCCUGAGGUUU(1) UAAUCUGCAUCCUGAGGUUUA(5)	GUAUUGGUGAGGACCGGGUAAUCUGCAUCCUGAGGUUUAAAGCUUGAUUAUACGCAUAACAUGCCGACGCAUAUAACUAUGUGUUUUAGAAUAGCUUUUAGUCCUCGGGAUGCGGAUUACCUCUUCCUUACUAUAC	34838	34858	- [Negative strand]	30	21	136	34822	34957	((((.((((((((..((({{{{{{{{{{{{{{{{{==={(((((.......(((((((..((((....)))).....)))))))........))))))..-->>>>>>>>>>>>>>>>>>>)..))))))))))))	-65.46	-48.1324	41.9118	34918	34938	0.009901
Bju-miR399_2	gi|339956298|gb|AENI01002289.1|_Brassica_rapa_Chr3_180	UGCCAAAGGAGAUUUGUCCGG	NO	GGUGCAAAUGCAUUACAGGGCAAGAUCUCCUUUGGCAGGAAUCUAUUACUUCAGUCUUACAUAUGCAUAUAUGUUUGUGGCGAGCUCUCUGCCAAAGGAGAUUUGUCCGGUAAUUCCUUUGCACC	61155	61175	+ [Positive strand]	3	21	125	61065	61189	((((((((.(.(((((.(((((.(((((((((((((((..(.((.........(((..((((((....))))))....))).)).)..)>>>>>>>>>>>>>>>>>>>->)))).).))))))))	-55.7	-44.56	44	-1	-1	0.009901
Bju-miR172_3	gi|339949348|gb|AENI01009239.1|_Brassica_rapa_Chr10_509	AGAAUCUUGAUGAUGCUGCAG	GGAGCAUCAUCAAGAUUCAC(1) GGAGCAUCAUCAAGAUUCACA(12)	GCUGUUGGAGCAUCAUCAAGAUUCACAAAUCAUCAAGUCUAAGCAUAUUCGUGUAAUUGAAUCCACAUACAUAAUGAUGCUUGGUGUAUGUAUGAGAAUCUUGAUGAUGCUGCAGCUGC	19257	19277	+ [Positive strand]	179	21	119	19162	19280	((.((({={{{{{{{{{{{{{{{{={{...(((((...((((((((....(((((..((....))..)))))....)))))))))).)))..))->>>>>>>>>>>>>>>>->>>).))	-49.4	-41.5126	38.6555	19168	19189	0.009901
Bju-miR397_1	gi|339949386|gb|AENI01009201.1|_Brassica_rapa_Chr10_471	UCAUUGAGUGCAGCGUUGAUGU	NO	GAACAUCAUUGAGUGCAGCGUUGAUGUGAUUUACUUAUCUUUUUCAUUGUUGAAUGGAUUAAAGCAAUUUACAUCAACGUUGGCUCAAUUAUGUUU	44470	44491	+ [Positive strand]	110	22	96	44464	44559	(((((<-<<<<<<<-<<<<<<<<<<<<((.((.(((((((..((((....)))).))))..))).)).))))))))))))))))))))).))))))	-38.7	-40.3125	32.2917	-1	-1	0.009901
Bju-miR171_3	gi|339957699|gb|AENI01000888.1|_Brassica_rapa_Chr1_888	UGAUUGAGCCGUGCCAAUAUC	NO	GAUAUUGGUGUGGUUCAAUCAGAAAACCACACUCUUUUGUUGUAGAGAUCGGUUUGUUUGAUUGAGCCGUGCCAAUAUC	11807	11827	- [Negative strand]	31	21	79	11806	11884	((((((((..((((((((((((((((((...((((........))))...))))).))>>>>>>>>>>>-->>>>>>>>	-40.6	-51.3924	40.5063	-1	-1	0.009901
Bju-miR391_1	gi|339949428|gb|AENI01009159.1|_Brassica_rapa_Chr10_429	UUCGCAGGAGAGAUAGCGCCA	UGGUGACGGUAUCUCUCCUAC(2)	UUCGCAGGAGAGAUAGCGCCAUCACUUCUUCUUAAGAGUUUAGAAGAUGGUGACGGUAUCUCUCCUACG	31102	31122	+ [Positive strand]	441	21	67	31103	31169	<<-<<<<<<<<<<-<<-<<((((((((.((....))...))))).}}}}}=}}=}}}}}}}}}}=})	-31.5	-47.0149	47.7612	31148	31169	0.009901
Bju-miR845_1	gi|339958267|gb|AENI01000320.1|_Brassica_rapa_Chr1_320	CGGCUCUGAUACCAAUUGAUG	NO	GUUUUCAUCACGUCGAUUGGUGCCAAAGCCAUGCUAAUUACGUCUCUGUCAAGAGGAAUUUUGCACGGCUCUGAUACCAAUUGAUGCAAUGAAAAC	6026	6046	+ [Positive strand]	4	21	96	5960	6055	((((((((..((((((((((((.((.((((.(((........(((((....)))))......)))->>>>->>->>>>>>>>>>>>..))))))))	-41.24	-42.9583	42.7083	-1	-1	0.009901
Bju-miR319_1	gi|339958414|gb|AENI01000173.1|_Brassica_rapa_Chr1_173	UUGGACUGAAGGGAGCUCCCU	AGAGCUUCCUUGAGUCCAUU(1) AGAGCUUCCUUGAGUCCAUUC(1)	UGGUAUUGUAGGGAUAUAUAUCGAGGGAGAGCUUCCUUGAGUCCAUUCAGAGGCUGUGAUAUGAUCCAAUUAGUUUCCGACUCAUCCAUCCAAAUACCGAGUUACUAAAUUUUAAGAUAGACUCGUUAAAUGAAUGAAUGAUGCGGUAGACAAAUUGGAACAUUGAUUCUCUUUGGUUGGACUGAAGGGAGCUCCCUCUCUCUUACUACUA	22944	22964	+ [Positive strand]	304	21	211	22767	22977	(((((..((((((.........(((((={{{{{{{{{{={{{{{{==((((((..((.(.(((.(((((((.(((((((..((((.(((.((..((.((((((.((........))...)))))).))..)).))).))))..))).)))).))))))).)))).))..)))))).->>>>>>->>>>>>>>>>->>))))))))))))))	-78.2	-37.0616	39.8104	22794	22814	0.009901
Bju-miR172_2	gi|339949441|gb|AENI01009146.1|_Brassica_rapa_Chr10_416	GGAAUCUUGAUGAUGCUGCAU	GCAGCAUCAUUAAGAUUCACA(5)	AGCCGGUAGUUGCAGAUGCAGCAUCAUUAAGAUUCACAAGAGAUGUGCUUUCCUUUGUUUGGGCUCGUUUCGAAUGGGAAUCUUGAUGAUGCUGCAUCAGCAAAUACAUGGCU	7726	7746	+ [Positive strand]	119	21	113	7649	7761	((((((((.((((.((({{{{{{{{{{{{{{{{{{={{.((((((.((((..........)))).))))))...))->>>>>>>>>>>>>>>>>>>>).)))).))).)))))	-59.7	-52.8319	44.2478	7666	7687	0.009901
Bju-miR390_1	gi|339949452|gb|AENI01009135.1|_Brassica_rapa_Chr10_405	AAGCUCAGGAGGGAUAGCGCC	CGCUAUCCAUCCUGAGUUCC(2)	GAGAAGUAGCUGUAAAGCUCAGGAGGGAUAGCGCCAUGACUCAUCACCAUUACUAUAUGUCUUUGUAUAUGUAAUGGCGCUAUCCAUCCUGAGUUCCAUGGCUUCUUCUU	52859	52879	+ [Positive strand]	654	21	110	52844	52953	((((((.((((((.-<<<<<<<<<-<<<<<<<<<<.(((....)))..((((((((((......))))).)))))))}}}}}}}}=}}}}}}}}}==)))))).))))))	-52.8	-48	43.6364	52921	52941	0.009901
Bju-miR156_4	gi|339949502|gb|AENI01009085.1|_Brassica_rapa_Chr10_355	UUGACAGAAGAAAGAGAGCAC	NO	AUGUUGACAGAAGAAAGAGAGCACAAGCCGGGAUUAGCAAAUAUAAAGUUUUGCCCUUGUCGGGAGUGUGCUCUCUUUACUUCUGUCACCAU	14077	14097	- [Negative strand]	159	21	92	14008	14099	(((-<<<<<<<<<<<<<<<<<<<<(..((.((....(((((........))))).....)).))..)))))))))))).))))))))).)))	-46.2	-50.2174	43.4783	-1	-1	0.009901
Precursors in other Brassica species
Bju-miR156_1	gi|150163911|gb|EE558005.1|EE558005 BNZB_RP_024_B08_28APR2004_062 Brassica naps BNZB Brassica naps cDNA 5'	UGACAGAAGAGAGUGAGCAC	UGCUCACUGCUCUUUCUGUCA(1) GCUCACUGCUCUUUCUGUCAG(3)	CUGACAGAAGAGAGUGAGCACACAAAGGUAAUUUGCAUAUACUGCAUUUACUUCUCUUGCGUGCUCACUGCUCUUUCUGUCAG	314	333	+ [Positive strand]	1019607	20	83	312	394	(<<<<<<<<<<<<<<<<<<<<.(((((((((..((((.....)))).))))))...))).))}}}}}}}=}}}=}}}}}}}}}	-42.2	-50.8434	43.3735	374	395	0.009901
Bju-miR156_1	gi|151291244|gb|EV197905.1|EV197905 0099058 Brassica naps Cold acclimation - light Brassica naps cDNA	UGACAGAAGAGAGUGAGCAC	GCUCACUCUCUCUAUGUCAUA(1)	AGAAGUUGACAGAAGAGAGUGAGCACACAAAGGGGGAAUUGUAUAAAAUUAAGUUUGUUGUAUAUAGUUGCUUUUGCGUGCUCACUCUCUCUAUGUCAUAACUUCU	513	532	+ [Positive strand]	1019607	20	106	506	611	((((((<<<<<--<<<<<<<<<<<<<.((((((...(((((((((.(((.......))).))))))))).)))))).))}}}}}}}}}}}===}}}}}==))))))	-47.3	-44.6226	36.7925	585	606	0.009901
Bju-miR156_1	gi|189125347|gb|FG577558.1|FG577558 BN24DYSC_UP_081_B04_8FEB2008_030 BN24DYSC Brassica naps cDNA 5'	UGACAGAAGAGAGUGAGCAC	NO	GAAUUUGACAGAAGAGAGUGAGCACACAAACGCACUUGCAUGUUCGAUGCACUUGCUUCUCUUGCGUGCUCACUGCUUUAUCUGUCAGAUUC	115	134	+ [Positive strand]	1019607	20	92	109	200	(((((<<<<<<<<<<<<<<<<<<<<.(((..(((..(((((.....)))))..))).....))).))))))))).)))).))))))))))))	-44	-47.8261	45.6522	-1	-1	0.009901
Bju-miR156_1	gi|224858289|gb|FI702168.1|FI702168 BOT01-34L11TR BOT01 Brassica oleracea genomic clone BOT01-34L11	UGACAGAAGAGAGUGAGCAC	UGCUCACUGCUCUAUCUGUCA(3) GCUCACUGCUCUAUCUGUCAG(10) UCACUGCUCUAUCUGUCAGA(1)	GAAACUGACAGAAGAGAGUGAGCACACAAAGGCACUUUGCAUGUUCGAUGCAUUUGCUUCUCUUGCGUGCUCACUGCUCUAUCUGUCAGAUUC	365	384	- [Negative strand]	1019607	20	93	296	388	(((.(<<<<<<<<<<<<<<<<<<<<.((((((((...(((((.....)))))..)))))...))).))}}}}}}}=}}}}=}}}}}}}}.)))	-46.7	-50.2151	46.2366	299	319	0.009901
Bju-miR156_2	gi|224904967|gb|FI747373.1|FI747373 BOT01-98A2TR BOT01 Brassica oleracea genomic clone BOT01-98A2	UGACAGAAGAGAGCGAGCAC	GCUCACUCUCUCUAUGUCAUA(1)	AGAAGUUGACAGAAGAGAGCGAGCACACAAAGGGGGGAUUGUAUAAAAUUAAGUUUGUUGUAUAUAGUUGCUUUUGCGUGCUCACUCUCUCUAUGUCAUAACUUCU	187	206	- [Negative strand]	5034	20	106	106	211	((((((<<<<<--<<<<<<-<<<<<<.((((((...(((((((((.(((.......))).))))))))).)))))).))}}}}=}}}}}}===}}}}}==))))))	-43.8	-41.3208	38.6792	111	131	0.009901
Bju-miR156_2	gi|23433300|gb|BH952073.1|BH952073 odi99c08.b1 B.oleracea002 Brassica oleracea genomic	UGACAGAAGAGAGCGAGCAC	NO	UGACAGAAGAGAGCGAGCACACAAAGGGAGAAUUGUAUAAAAUUAAUUUGUAUAUGGUUUACUUUUGCGUGCUCAUUCUCGUUCUGUCA	325	344	- [Negative strand]	5034	20	89	255	343	<<<<<<<<<<<<<-<<<<<<.((((((..((((..((((.((.....)).))))..)))).)))))).)))))).))))).))))))))	-40.4	-45.3933	37.0787	-1	-1	0.009901
Bju-miR156_2	gi|23461231|gb|BH978228.1|BH978228 ode13e02.g1 B.oleracea002 Brassica oleracea genomic	UGACAGAAGAGAGCGAGCAC	NO	UGACAGAAGAGAGCGAGCACACAAAGGGAGAAUUGUAUAAAAUUAAUUUGUAUAUGGUUUACUUUUGCGUGCUCAUUCUCGUUCUGUCA	677	696	- [Negative strand]	5034	20	89	607	695	<<<<<<<<<<<<<-<<<<<<.((((((..((((..((((.((.....)).))))..)))).)))))).)))))).))))).))))))))	-40.4	-45.3933	37.0787	-1	-1	0.009901
Bju-miR156_2	gi|23528783|gb|BH990544.1|BH990544 oee42d08.g1 B.oleracea002 Brassica oleracea genomic	UGACAGAAGAGAGCGAGCAC	GCUCACUCUCUCUAUGUCAUA(1)	AGAAGUUGACAGAAGAGAGCGAGCACACCAAGGGGGGAUUGUAUAAAAUUAAGUUUGGUGUAUAUAGUUGCUUUUGCGUGCUCACUCUCUCUAUGUCAUAACUUCU	524	543	+ [Positive strand]	5034	20	106	517	622	((((((<<<<<--<<<<<<-<<<<<<....(((((.(((((((((..((((....)))).))))))))).)))))..))}}}}=}}}}}}===}}}}}==))))))	-41.2	-38.8679	40.566	596	617	0.009901
Bju-miR156_4	gi|242288746|gb|GR441911.1|GR441911 BNAOV1GH_T3_026_C11_12JULY2007_091 BNAOV1GH Brassica naps cDNA 5'	UUGACAGAAGAAAGAGAGCAC	NO	ACAGAAGAAAGAGAGCACAAGCCGGGAUUAGCAAAUAUAAAGUUUUGCCCUUGUCGGGAGUGUGCUCUCUUUACUUCUGU	651	671	+ [Positive strand]	159	21	80	653	732	<<<<<<<<<<<<<<<<<<(..((.((....(((((........))))).....)).))..)))))))))))).)))))))	-39.6	-49.5	43.75	-1	-1	0.009901
Bju-miR156_4	gi|242291493|gb|GR439676.1|GR439676 BNAOV1GH_T3_001_B11_12JULY2007_093 BNAOV1GH Brassica naps cDNA 5'	UUGACAGAAGAAAGAGAGCAC	NO	AUGUUGACAGAAGAAAGAGAGCACAAGCCGGGAUUAGCAAAAAGAGAGUUUUGCCCUUGUCGGGAGUGUGCUCUCUUUACUUCUGCCACCAU	43	63	+ [Positive strand]	159	21	92	39	130	(((-<<-<<<<<<<<<<<<<<<<<(..((.((....((((((......)))))).....)).))..)))))))))))).)))))).)).)))	-41.5	-45.1087	46.7391	-1	-1	0.009901
Bju-miR157_1	gi|23431627|gb|BH950400.1|BH950400 odi72e09.b1 B.oleracea002 Brassica oleracea genomic	UUGACAGAAGAUAGAGAGCAC	NO	GGGAGUGAUGCAGGUUGUUGACAGAAGAUAGAGAGCACUAAGGAUGACAUGCAAGUACAAGGAUAUAAGGAAAUUCAAGAAAGAGAGGAAAAAAGAGCCUGCAUCUUUACUCUUUUGUGCUCUCUAUACUUCUGUCAAUACCAUUAUUUAUUCCU	329	349	- [Negative strand]	57062	21	155	211	365	((((((((....(((.(<<<<<<<<<<<<<<<<<<<<<.(((((.((.((((........((((........)))).........(((.........))))))).))...))))).))))))))))).)))))))))))))).....))))))))	-55.5	-35.8064	38.0645	-1	-1	0.009901
Bju-miR158_1	gi|23404072|gb|BH924006.1|BH924006 odh89e11.b1 B.oleracea002 Brassica oleracea genomic	UCCCAAAUGUAGACAAAGCA	NO	ACGUCUUCUCGGUAUUUCUUUGUCUAUAUUCUUGGAAAAAGCGAUGAGGUCUCGUUGCACUUUCCCAAAUGUAGACAAAGCAAAACCGUGAUGACGU	275	294	+ [Positive strand]	77	20	97	212	308	(((((.((.((((.((.(((((((((((((...(((((..(((((((....)))))))..))>>>-->>>>>>>>>>>>>->).)))).)).)))))	-44.2	-45.567	41.2371	-1	-1	0.009901
Bju-miR159_1	gi|151183714|gb|EV097219.1|EV097219 0196044 Brassica naps Apical meristem Brassica naps cDNA	UUUGGAUUGAAGGGAGCUCUA	NO	GAACAAAGAAGUAGGGCUCCUUAUAGUUCAAACGAGAGUUCAGCAGGGUAAAGAAAAGCUGCUAAGCUAUGAAUCCCAUAAGCCCUAAUCCUUAUUUAUAAAAAGGAUUUGGUUAUAUGGCUUACAUAUCUCAGGAGCUUUAACUUGCCCUUUAAUUGCUUUUACUCUUCUUUGGAUUGAAGGGAGCUCUACAUCUUCUUUC	466	486	+ [Positive strand]	591	21	202	295	496	(((..((((.((((((((((((.(((((((((.((((((..((((((((((...((((((.((.((.((((.(..(((((((((..(((((((.........))))))).)))).)))))..).)))).)).)).))))))...))))))......))))...)))))).>>>>>>>>>->>>>>>>>>>>).))))..)))	-80.8	-40	37.6238	-1	-1	0.009901
Bju-miR159_1	gi|151183633|gb|EV097138.1|EV097138 0195912 Brassica naps Apical meristem Brassica naps cDNA	UUUGGAUUGAAGGGAGCUCUA	NO	GAACAAAGAAGUAGGGCUCCUUAUAGUUCAAACGAGAGUUCAGCAGGGUAAAGAAAAGCUGCUAAGCUAUGAAUCCCAUAAGCCCUAAUCCUUAUUUAUAAAAAGGAUUUGGUUAUAUGGCUUACAUAUCUCAGGAGCUUUAACUUGCCCUUUAAUUGCUUUUACUCUUCUUUGGAUUGAAGGGAGCUCUACAUCUUCUUUC	237	257	- [Negative strand]	591	21	202	225	426	(((..((((.((((((((((((.(((((((((.((((((..((((((((((...((((((.((.((.((((.(..(((((((((..(((((((.........))))))).)))).)))))..).)))).)).)).))))))...))))))......))))...)))))).>>>>>>>>>->>>>>>>>>>>).))))..)))	-80.8	-40	37.6238	-1	-1	0.009901
Bju-miR159_1	gi|242293234|gb|GR447936.1|GR447936 BNAOV1GH_T3_071_H09_14SEPT2007_065 BNAOV1GH Brassica naps cDNA 5'	UUUGGAUUGAAGGGAGCUCUA	NO	AGAAGUAGAGCUCCUUAAAGUUCAAACGAGAGUUUAGCAGGGUAAAGAAAAGCUGCUAAGCUAUGGAUCCCAUAAGCCCUAACCUUAAACAUAGAAAAAGGAUUUGGUUAUAUGGCUUGCAUAUCUCAGGAGCUUUAACUUGCCCUUUAAUGGCUUUUACUCUUCUUUGGAUUGAAGGGAGCUCUACAUCU	260	280	+ [Positive strand]	591	21	191	94	284	(((.((((((((((((..((((((((.((((((..((((((((((...((((((.((.((.((((.(..(((((((((..(.((((...........)))).)..)))).)))))..).)))).)).)).))))))...)))))))......)))...)))))).>>>>>>>>-->>>>>>>>>>>).)))	-76	-39.7906	39.267	-1	-1	0.009901
Bju-miR160_1	gi|150873971|gb|ES904429.1|ES904429 BNARO4GH_T3_019_A12_24NOV2006_096 Brassica naps BNARO4GH Brassica naps cDNA 5'	UGCCUGGCUCCCUGUAUGCCA	UGGCGUACAGAGUAGUCAAGC(1) UGGCGUACAGAGUAGUCAAGCA(76) GGCGUACAGAGUAGUCAAGCA(1) GCGUACAGAGUAGUCAAGCA(1)	GUCAUGCCUGGCUCCCUGUAUGCCACAAGUAAAUACCGAUCUCAUUAUGAAAUCGGACACUAGUGGCGUACAGAGUAGUCAAGCAUAAC	152	172	+ [Positive strand]	1797	21	89	147	235	((.(<<<-<<<<<-<<<<<<<<<<<(.(((.....(((((.((.....)).)))))..))).)}}}}}}}}}}=}=}}}}}=}}}).))	-39	-43.8202	46.0674	210	232	0.009901
Bju-miR160_1	gi|224877046|gb|FI717315.1|FI717315 BOT01-54F9TR BOT01 Brassica oleracea genomic clone BOT01-54F9	UGCCUGGCUCCCUGUAUGCCA	GCGUACGAGGAGCCAAGCAU(1) GCGUACGAGGAGCCAAGCAUG(67) CGUACGAGGAGCCAAGCAUG(5) GCGUACGAGGAGCCAAGCAUGA(4)	UCAUGCCUGGCUCCCUGUAUGCCACAAGUGGGUAUCAAUUUUGGUUGAAAAAUUGGCUGCUGGUGGCGUACGAGGAGCCAAGCAUGA	295	315	+ [Positive strand]	1797	21	87	291	377	(((<<<-<<<<<<<-<<<<<<<<<(.((..(...((((((((......)))))))))..)).)))}}}}}}}=}}}}}}}=}}}}})	-49.7	-57.1264	50.5747	356	377	0.009901
Bju-miR160_1	gi|23582123|gb|BZ022389.1|BZ022389 oei38c09.b1 B.oleracea002 Brassica oleracea genomic	UGCCUGGCUCCCUGUAUGCCA	UGGCGUACAGAGUAGUCAAGC(1) UGGCGUACAGAGUAGUCAAGCA(76) GGCGUACAGAGUAGUCAAGCA(1) GCGUACAGAGUAGUCAAGCA(1) GCGUACAGAGUAGUCAAGCAUG(65) CGUACAGAGUAGUCAAGCAUG(1) CGUACAGAGUAGUCAAGCAUGA(4)	GUCGUGCCUGGCUCCCUGUAUGCCACAAGUAUAUACCGAUCUCGUUACGAAAUCUAUGGCUAGUGGCGUACAGAGUAGUCAAGCAUGAC	485	505	+ [Positive strand]	1797	21	89	480	568	((((<<<-<<<<<-<<<<<<<<<<<(.(((.((((..(((.(((...))).)))))))))).)}}}}}}}}}}=}=}}}}}=}}}))))	-41.1	-46.1798	49.4382	543	565	0.009901
Bju-miR160_1	gi|308683627|gb|DK540095.1|DK540095 DK540095 fll-length kale cDNA library (flowers) Brassica oleracea var. acephala cDNA clone KALE-065E08 3'	UGCCUGGCUCCCUGUAUGCCA	UGGCGUAUGAGGAGCCAUGCA(1) GGCGUAUGAGGAGCCAUGCA(2)	AUGCCUGGCUCCCUGUAUGCCAUCCUCUAAGCUCAUCGACCAUUGAUGACCUCCGUGAAUGGCGUAUGAGGAGCCAUGCAU	193	213	+ [Positive strand]	1797	21	81	191	271	(<<<-<<<<<<<--<<<<<<<<(.(.(..((.(((((((...))))))).))..).).))}}}}}}}==}}}}}}}=}}})	-39.7	-49.0123	53.0864	251	271	0.009901
Bju-miR160_2	gi|27039512|gb|BZ512955.1|BZ512955 BOMQY14TR BO_2_3_KB Brassica oleracea genomic clone BOMQY14	UCAAUGCACUGAAAGUGACUA	UCACUUUCAAUGCGUUGAUC(1)	UGCUUCGAUCAAUGCACUGAAAGUGACUACACCAGGAUUUGUUUUUAAGUUUUUGCUCUCAUCUAUAUGAUAAAGAUGAAAAUUAGCCUCUGAUGUAGUCACUUUCAAUGCGUUGAUCAUAGCA	342	362	+ [Positive strand]	422	21	124	333	456	((((..((<<<<<<<<-<<<<<<<<<<<<((.((((...........(((....))).((((((.........)))))).........)))).)))))}}}}}}}}}=}}}}}}}}}}..))))	-50.8	-40.9677	35.4839	431	451	0.009901
Bju-miR160_3	gi|151308454|gb|EV208491.1|EV208491 0177346 Brassica naps Leaf - droght Brassica naps cDNA	UCGAUAAACCUCUGCAUCCAG	UGGAGGCAGCGGUUCAUCGAU(14) UGGAGGCAGCGGUUCAUCGAUC(4) GGAGGCAGCGGUUCAUCGAUC(5)	GAAGUCGCUGGAGGCAGCGGUUCAUCGAUCAAUUCCUGUGAAAAAUGAUGUUGGAAACAAUUUACAUGGCAAGCAUGAAUCGAUCGAUAAACCUCUGCAUCCAGUGCUUC	294	314	+ [Positive strand]	130	21	110	210	319	((((.((({{{{={{{{={{{{={{{{{{(.((((.(((.....(((..((((....))))...))).....))).)))).))>>>>>->>>>->>>>->>>>>))))))	-52	-47.2727	44.5455	218	239	0.009901
Bju-miR160_3	gi|23398126|gb|BH920058.1|BH920058 odh70g02.b1 B.oleracea002 Brassica oleracea genomic	UCGAUAAACCUCUGCAUCCAG	UGGAGGCAGCGGUUCAUCGAU(14) UGGAGGCAGCGGUUCAUCGAUC(4) GGAGGCAGCGGUUCAUCGAUC(5)	CGCUGGAGGCAGCGGUUCAUCGAUCUCUUCCUGUGGAUUUUAUUUUUGGUUGUUUGUUGUUGUUGGAAAGAGAUUAAAAGCAUGAACGGAUCGAUAAACCUCUGCAUCCAGCG	176	196	- [Negative strand]	130	21	113	173	285	((({{{{={{{{={{{{={{{{{{((.(((.(((.((((((.((((..(.............)..))))))))))....))).))).)))>>>>>->>>>->>>>->>>>>))	-45.42	-40.1947	44.2478	261	281	0.009901
Bju-miR160_3	gi|26699199|gb|BZ441369.1|BZ441369 BONDK69TR BO_1.6_2_KB_tot Brassica oleracea genomic clone BONDK69	UCGAUAAACCUCUGCAUCCAG	UGGAGGCAGCGGUUCAUCGAU(14) UGGAGGCAGCGGUUCAUCGAUC(4) GGAGGCAGCGGUUCAUCGAUC(5)	CGCUGGAGGCAGCGGUUCAUCGAUCUCUUCCUGUGGAUUUUAUUUUUGGUUGUUUGUUGUUGUUGGAAAGAGAUUAAAAGCAUGAACGGAUCGAUAAACCUCUGCAUCCAGCG	273	293	- [Negative strand]	130	21	113	270	382	((({{{{={{{{={{{{={{{{{{((.(((.(((.((((((.((((..(.............)..))))))))))....))).))).)))>>>>>->>>>->>>>->>>>>))	-45.42	-40.1947	44.2478	358	378	0.009901
Bju-miR160_3	gi|308654546|gb|DK483868.1|DK483868 DK483868 fll-length kale cDNA library (leaves) Brassica oleracea var. acephala cDNA clone KALE-074B01 5'	UCGAUAAACCUCUGCAUCCAG	UGGAGGCAGCGGUUGAUCGAU(1) UGGAGGCAGCGGUUGAUCGAUC(2)	GCGAAAGAUGCUGGAGGCAGCGGUUGAUCGAUCUCUUUGUGGGAAAUUUUGGAAAAAAAAACUCAAAGCAUGAACAGAUCGAUAAACCUCUGCAUCCAGCGGUCGC	503	523	+ [Positive strand]	130	21	106	424	529	((((....((({{{{={{{{={{{{={{{{{{{(.((..((.((..((((......))))..))....))..)).)))>>>>>->>>>->>>>->>>>>)).))))	-45.6	-43.0189	46.2264	435	457	0.009901
Bju-miR160_3	gi|308674684|gb|DK503408.1|DK503408 DK503408 fll-length kale cDNA library (capsles) Brassica oleracea var. acephala cDNA clone KALE-125C08 5'	UCGAUAAACCUCUGCAUCCAG	NO	CUGGAGGCAGCGGUUCAUCGAUCUCUUCCUGUGGAUUUUUUUUUUGGUUGUUUGUUGUUGUUGGAAAGAGAUUAAAAGCAUGAACGGAUCGAUAAACCUCUGCAUCCAG	472	492	+ [Positive strand]	130	21	109	383	491	(((((.((((.((((.((((((((.(((.(((.(((((((((((..................)))))))))))....))).))).)))>>>>>->>>>->>>>->>>>>	-41.07	-37.6789	42.2018	-1	-1	0.009901
Bju-miR164_2	gi|23593978|gb|BZ028722.1|BZ028722 oeg98a05.b1 B.oleracea002 Brassica oleracea genomic	UGGAGAAGCAGGGCACGUGCG	GCACGUGUUCUACUACUCCAAC(1) CACGUGUUCUACUACUCCAAC(6)	GGAUGAGUAACACUUGCUGGAGAAGCAGGGCACGUGCGAACUAAUGAGAGAUCUGUACAUGUUGAUCAUAUUUUUGCACGUGUUCUACUACUCCAACACGUGUGUCUCUCC	213	233	- [Negative strand]	728	21	111	139	249	(((.(((..((((.((.<<<<<-<<-<<<<<<<<<<<<((...((((..(((........)))..))))...))))}}}}}}}}}}=}}=}}}}}=}).))))..))))))	-46.2	-41.6216	45.9459	152	172	0.009901
Bju-miR164_2	gi|33797971|gb|CC955856.1|CC955856 BOICJ30TF BO_1.4_1.6_KB_nc Brassica oleracea genomic clone BOICJ30	UGGAGAAGCAGGGCACGUGCG	GCACGUGUUCUACUACUCCAAC(1) CACGUGUUCUACUACUCCAAC(6)	GGGUGAGUAACACUUGCUGGAGAAGCAGGGCACGUGCGAACAAAUGAGAUCGAUCGGUCUAUGUUGAUCAUAUUUUCGCACGUGUUCUACUACUCCAACACGUGUGUCUCCCC	175	195	+ [Positive strand]	728	21	113	157	269	(((.(((..((((.((.<<<<<-<<-<<<<<<<<<<<<((..((((.(((((((........))))))).))))))))}}}}}}}}}}=}}=}}}}}=}).))))..))))))	-54.1	-47.8761	49.5575	235	256	0.009901
Bju-miR165_1	gi|211917524|gb|FP063045.1|FP063045 FP063045 Brassica naps BAC library (JBnB) Brassica naps genomic clone JBnB108O15	UCGGACCAGGCUUCAUCCCCC	GGAAUGUUGUCUGGCUCGAG(10) GGAAUGUUGUCUGGCUCGAGG(211) GAAUGUUGUCUGGCUCGAGG(21) GAAUGUUGUCUGGCUCGAGGU(1)	GGGUUUAGAGGAAUGUUGUCUGGCUCGAGGUCAUGAAGAGUCGAUAUUUAACGAAAUACAAAACUCUAUAUGAUUCUCGGACCAGGCUUCAUCCCCCUCAACCU	60	80	- [Negative strand]	8663	21	104	52	155	(((((.((.{{={{{=={{{{{{=={{{{{(((((.(((((...(((((....)))))....))))).))))).))>>>-->>>>>>-->>>->>->).)))))	-40.7	-39.1346	44.2308	125	145	0.009901
Bju-miR165_1	gi|23418675|gb|BH938609.1|BH938609 odf03e06.g1 B.oleracea002 Brassica oleracea genomic	UCGGACCAGGCUUCAUCCCCC	GGAAUGUUGUCUGGAUCGAGG(19) GGAAUGUUGUCUGGAUCGAGGA(12)	GUUGAGGGGAAUGUUGUCUGGAUCGAGGAUAUUAUAUAUACACAAAUACGUAUAUAUGUUAAUACAAGUGUUUGAUCAUAUAUGUAUAUAGAUUAUUCUCGGACCAGGCUUCAUCCCCCCUAAC	541	561	+ [Positive strand]	8663	21	124	442	565	((((.(({{={{{=={{{{{{={{{{{{(((...(((((((((((((((((((........))))..)))))))........))))))))...)))))>>>>->>>>>>-->>>->>>>.))))	-47.2	-38.0645	35.4839	449	470	0.009901
Bju-miR166_1	gi|18751232|gb|BH680789.1|BH680789 BOMNR94TF BO_2_3_KB Brassica oleracea genomic clone BOMNR94	UCGGACCAGGCUUCAUUCCCC	UGGAUGAUGCUUGGCUCGAG(1) UGGAUGAUGCUUGGCUCGAGA(13)	AAGUUCAGGUGGAUGAUGCUUGGCUCGAGACCAUUCAAUAUGAUCAUUGUGAUGAUGAUGAUGAUGAUGAUAAUGAUAAUGAUAAUGAUGUCGGACCAGGCUUCAUUCCCCUCAACUU	172	192	- [Negative strand]	47450	21	118	164	281	(((((.(((={{{{{{={{{{{{=={{{={.((((((.(((.(((((..(.((....)).)..))))).))).)))........))).).>>>-->>>>>>->>>>>>->>).)))))	-42.1	-35.678	39.8305	251	271	0.009901
Bju-miR166_1	gi|206999013|gb|CU967744.1|CU967744 CU967744 Brassica naps BAC library (JBnB) Brassica naps genomic clone JBnB172C22	UCGGACCAGGCUUCAUUCCCC	GGGGAAUGUUGUCUGGCUCGA(2) GGGAAUGUUGUCUGGCUCGAG(1) GGAAUGUUGUCUGGCUCGAG(10) GGGAAUGUUGUCUGGCUCGAGG(1) GGAAUGUUGUCUGGCUCGAGG(211) GAAUGUUGUCUGGCUCGAGG(21) GGAAUGUUGUCUGGCUCGAGGA(5) GAAUGUUGUCUGGCUCGAGGA(18)	GGGGUUUUCUCUUUUGAGGGGAAUGUUGUCUGGCUCGAGGACUCUGGCUCUAUCAACUCAUGUUGGAUCUUCUUCGAUCUAAUCGAAUCAAACCUCUAUGUUUGAGAUCUGAUUAAGGUUUUAGUGUCGUCGGACCAGGCUUCAUUCCCCCCAAUUAUUGCUCCCU	159	179	+ [Positive strand]	47450	21	166	29	194	((((.........(((.(({{{{{{=={{{{{{=={{{={((.((((((..((((..((..((((((((......))))))))....((((((......))))))))..))))...)))..))).))).>>>-->>>>>>-->>>>>>>>.)))........))))	-62.62	-37.7229	45.1807	48	69	0.009901
Bju-miR166_1	gi|308626963|gb|DK485425.1|DK485425 DK485425 fll-length kale cDNA library (seedlings) Brassica oleracea var. acephala cDNA clone KALE-078C08 5'	UCGGACCAGGCUUCAUUCCCC	GGGGAAUGUUGUCUGGCUCGA(2) GGGAAUGUUGUCUGGCUCGAG(1) GGAAUGUUGUCUGGCUCGAG(10) GGGAAUGUUGUCUGGCUCGAGG(1) GGAAUGUUGUCUGGCUCGAGG(211) GAAUGUUGUCUGGCUCGAGG(21) GGAAUGUUGUCUGGCUCGAGGA(5) GAAUGUUGUCUGGCUCGAGGA(18)	AGGGGUUUUCUCUUUUGAGGGGAAUGUUGUCUGGCUCGAGGACUCUAGCUCUAUCUACUCAUGUUGGAUCCUCUUCGAUCUAAUCGAAUCAAACCUCUAUGUUUGAGAUCUGAUUAGGGUUUUAGUGUCGUCGGACCAGGCUUCAUUCCCCCCAAUUAUUGCUCCCU	287	307	+ [Positive strand]	47450	21	167	156	322	((((((........(((.(({{{{{{=={{{{{{=={{{={((.(((((((((((.......((((((((......)))))))).((.((((((......))))))..)).)).))))))..))).))).>>>-->>>>>>-->>>>>>>>.))).....)).))))	-65.52	-39.2335	45.509	176	197	0.009901
Bju-miR167_2	gi|150879796|gb|ES910254.1|ES910254 BNARO6GH_T3_017_A06_07DEC2006_048 Brassica naps BNARO6GH Brassica naps cDNA 5'	UGAAGCUGCCAGCAUGAUCUU	GAUCAUGUGGCAGUUUCACC(2)	UGAAGCUGCCAGCAUGAUCUUAACUUCUCUCUCUAUAUAUUAUAUAUGUAGAUUUGAUCAGGGAAGAUCAGAUCAUGUGGCAGUUUCA	46	66	+ [Positive strand]	223	21	88	45	132	<<<<<<<<<<<-<<<<<<<<-..(((((((.(((((((((...))))))))).......)))))))...)))))))))))))))))))	-40	-45.4545	36.3636	115	133	0.009901
Bju-miR167_1	gi|151028411|gb|EV042229.1|EV042229 BNSCS3CT_UP_072_E08_05MAY2007_056 Brassica naps BNSCS3CT Brassica naps cDNA 5'	UGAAGCUGCCAGCAUGAUCUA	NO	UGAAGCUGCCAGCAUGAUCUAGUUAACUUUAUUUCUCCGUUGUUUAUCCAUGACAAUGGAAAAGGGAUAAGUGUCGAUUAGAUCAUGUUCGUAGUUUCA	117	137	+ [Positive strand]	12775	21	99	116	214	<<<<<<<<<-<<<<<<<<<<<((..(((((((..((((((((((.......)))))))))...)..))))).))..))))))))))))).)))))))))	-46.9	-47.3737	37.3737	-1	-1	0.009901
Bju-miR167_1	gi|151029528|gb|EV043346.1|EV043346 BNSCS3CT_UP_086_F12_05MAY2007_086 Brassica naps BNSCS3CT Brassica naps cDNA 5'	UGAAGCUGCCAGCAUGAUCUA	NO	UGAAGCUGCCAGCAUGAUCUAGUUAACUUUAUUUCUCCGUUGUUUAUCCAUGACAAUGGAAAAGGGAUAAGUGUCGAUUAGAUCAUGUUCGUAGUUUCA	117	137	+ [Positive strand]	12775	21	99	116	214	<<<<<<<<<-<<<<<<<<<<<((..(((((((..((((((((((.......)))))))))...)..))))).))..))))))))))))).)))))))))	-46.9	-47.3737	37.3737	-1	-1	0.009901
Bju-miR167_1	gi|151042045|gb|EV055825.1|EV055825 BNSCS3CT_UP_238_G02_17MAY2007_004 Brassica naps BNSCS3CT Brassica naps cDNA 5'	UGAAGCUGCCAGCAUGAUCUA	NO	UGAAGCUGCCAGCAUGAUCUAGUUAACUUUAUUUCUCCGUUGUUUAUCCAUGACAAUGGAAAAGGGAUAAGUGUCGAUUAGAUCAUGUUCGUAGUUUCA	106	126	+ [Positive strand]	12775	21	99	105	203	<<<<<<<<<-<<<<<<<<<<<((..(((((((..((((((((((.......)))))))))...)..))))).))..))))))))))))).)))))))))	-46.9	-47.3737	37.3737	-1	-1	0.009901
Bju-miR167_1	gi|189121212|gb|FG569613.1|FG569613 BN18DYSC_UP_195_F02_4APR2008_006 BN18DYSC Brassica naps cDNA 5'	UGAAGCUGCCAGCAUGAUCUA	NO	UGAAGCUGCCAGCAUGAUCUAGUUAACUUUAUUUCUCCGUUGUUUACCCAUGACAAUGGAAAAGGGAUAAGUGUCGAUUAGAUCAUGUUCGUAGUUUCA	119	139	+ [Positive strand]	12775	21	99	118	216	<<<<<<<<<-<<<<<<<<<<<((..(((((((..((((((((((.......)))))))))...)..))))).))..))))))))))))).)))))))))	-46.9	-47.3737	38.3838	-1	-1	0.009901
Bju-miR167_1	gi|224901187|gb|FI741872.1|FI741872 BOT01-93L2TF BOT01 Brassica oleracea genomic clone BOT01-93L2	UGAAGCUGCCAGCAUGAUCUA	NO	UGAAGCUGCCAGCAUGAUCUAAUUAUCUUUCUUUCUCCGUUGACGAUGGAAAAGACAUGAGUGUUGAUUAGAUCAUGUUCGCAGUUUCA	631	651	- [Negative strand]	12775	21	89	562	650	<<<<<<<<<-<<<<<<<<<<<((((.((((((((.((((((...)))))))))))...)))...))))))))))))))).)))))))))	-40.8	-45.8427	39.3258	-1	-1	0.009901
Bju-miR168_1	gi|151042562|gb|EV056342.1|EV056342 BNSCS3CT_UP_246_B03_17MAY2007_029 Brassica naps BNSCS3CT Brassica naps cDNA 5'	UCGCUUGGUGCAGGUCGGGAA	CCUGCCUUCCAUCAACUGAAU(1)	GGUCUCGGAUUCGCUUGGUGCAGGUCGGGAACUGAUUGACUGACACCGCCACGUGGAUUUUCACGGUUGGCUUGUGAGCAGGGAUCGGAUCCUGCCUUCCAUCAACUGAAUCGGAGCCC	607	627	- [Negative strand]	19357	21	119	518	636	((.(((.(((<<<-<<<<<<-<<<-<<<<<-((((((..(((.(((.(((((((((....)))))..))))..)))..))).)))))).)}}}}}}}==}}}}}}=}}}}}).))).))	-54.3	-45.6303	57.1429	525	545	0.009901
Bju-miR168_1	gi|224861597|gb|FI703450.1|FI703450 BOT01-43E18TF BOT01 Brassica oleracea genomic clone BOT01-43E18	UCGCUUGGUGCAGGUCGGGAA	AUCCCGCCUUGUAUCAAGUG(2) GAUCCCGCCUUGUAUCAAGUGA(4) AUCCCGCCUUGUAUCAAGUGA(5) CGGAUCCCGCCUUGUAUCAAG(12) UCCCGCCUUGUAUCAAGUGAA(1) CCCGCCUUGUAUCAAGUGAA(5) UCCCGCCUUGUAUCAAGUGAAU(11) CCCGCCUUGUAUCAAGUGAAU(42)	UUACGGCGGCCUCUGAUUCGCUUGGUGCAGGUCGGGAACUGAUUGGCUGACACUGCCACGUGGCUUUUCAUGGUUGGCUUGUGAGCAGGGAUCGGAUCCCGCCUUGUAUCAAGUGAAUCCGAGUCCGACGUGA	320	340	- [Negative strand]	19357	21	133	224	356	(((((.(((.(((.(((<<<<<<<<<<<<<<-<<<<<-((((((.(((.(((..(((((((((....)))))..)))).))).)))...)))))).)}}}}=}}}}}}}}}}}}}}}}).))).))).)))))	-72.9	-54.812	56.391	238	258	0.009901
Bju-miR169_4	gi|206700300|gb|CU944678.1|CU944678 CU944678 Brassica naps BAC library (JBnB) Brassica naps genomic clone JBnB055N04	UGAGCCAAAGAUGACUUGCCG	NO	GAGCCAAAGAUGACUUGCCGACCAAUGAAUCUAAAACUGAUUUUGGCAACCGGCAAGUUGACUUUGGCUC	456	476	- [Negative strand]	95	21	70	405	474	<<<<<<<<<-<<<<<<<<<<.(((..(((((.......))))))))....)))))))))).)))))))))	-33.6	-48	45.7143	-1	-1	0.009901
Bju-miR169_4	gi|206715913|gb|CU937276.1|CU937276 CU937276 Brassica naps BAC library (JBnB) Brassica naps genomic clone JBnB054I13	UGAGCCAAAGAUGACUUGCCG	NO	GAGCCAAAGAUGACUUGCCGACCAAUGAAUCUAAAACUGAUUUUGGCAACCGGCAAGUUGACUUUGGCUC	434	454	- [Negative strand]	95	21	70	383	452	<<<<<<<<<-<<<<<<<<<<.(((..(((((.......))))))))....)))))))))).)))))))))	-33.6	-48	45.7143	-1	-1	0.009901
Bju-miR169_4	gi|206996834|gb|CU963757.1|CU963757 CU963757 Brassica naps BAC library (JBnB) Brassica naps genomic clone JBnB130L13	UGAGCCAAAGAUGACUUGCCG	NO	GAGCCAAAGAUGACUUGCCGACCAAUGAAUCUAAAACUGAUUUUGGCAACCGGCAAGUUGACUUUGGCUC	445	465	- [Negative strand]	95	21	70	394	463	<<<<<<<<<-<<<<<<<<<<.(((..(((((.......))))))))....)))))))))).)))))))))	-33.6	-48	45.7143	-1	-1	0.009901
Bju-miR169_4	gi|206998565|gb|CU957162.1|CU957162 CU957162 Brassica naps BAC library (JBnB) Brassica naps genomic clone JBnB186I03	UGAGCCAAAGAUGACUUGCCG	NO	GAGCCAAAGAUGACUUGCCGACCAAUGAAUCUAAAACUGAUUUUGGCAACCGGCAAGUUGACUUUGGCUC	137	157	- [Negative strand]	95	21	70	86	155	<<<<<<<<<-<<<<<<<<<<.(((..(((((.......))))))))....)))))))))).)))))))))	-33.6	-48	45.7143	-1	-1	0.009901
Bju-miR169_5	gi|23570474|gb|BZ014943.1|BZ014943 oeh94b10.b1 B.oleracea002 Brassica oleracea genomic	UAGCCAAGGAUGACUUGCCUA	UAGGCAGUCUCCUUGGCUAUC(2) AGGCAGUCUCCUUGGCUAUC(16)	GGUAGCCAAGGAUGACUUGCCUACUUCUUUGCGAAGGAAAAUGGUCACGGUGUCAUGUUUGAAAGUGAAUAUACAUUUUUAAGAGUAUAUCAAUUAGUGACCAUUUUGCGUAUAAAAAGAUAUUAGGCAGUCUCCUUGGCUAUC	415	435	- [Negative strand]	20	21	144	293	436	((<<<<<<<<<<-<<<<-<<<<<..(((((.....(.((((((((((((((((.((.((((((((((......)))))))))).))))))).....))))))))))).)......)))))...)}}}}}}}}}}}}}}}}}}}}	-61.9	-42.9861	37.5	292	311	0.009901
Bju-miR169_4	gi|23581044|gb|BZ021311.1|BZ021311 oef90g09.b1 B.oleracea002 Brassica oleracea genomic	UGAGCCAAAGAUGACUUGCCG	NO	GAGCCAAAGAUGACUUGCCGAUUUUACCAAAGAAUUUAAAACUGAUAAUGGUGACUGGCAAGUCGACUUUGGCUC	448	468	- [Negative strand]	95	21	75	392	466	<<<<<<<<<-<<<<<<<<<<...((((((...................)))))).)))))))))).)))))))))	-34.21	-45.6133	41.3333	-1	-1	0.009901
Bju-miR169_3	gi|23631956|gb|BZ041682.1|BZ041682 llr23g03.b1 B.oleracea002 Brassica oleracea genomic	UAGCCAAGGAUGACUUGCCUG	NO	GUAGCCAAGGAUGACUUGCCUGCGUCUUUAACACCAUAUCAAAGACUUUAUCGAUAGUCUCUGAGUUGGUUAGGCUGUAGGCAGUCUCCUUGGCUAU	122	142	+ [Positive strand]	465	21	97	120	216	(<<<<<<<<<<-<<<<-<<<<<(((((.....((((..(((.(((((........))))).)))..)))).)))).)))))))))))))))))))))	-49.6	-51.134	45.3608	-1	-1	0.009901
Bju-miR169_3	gi|23672585|gb|BZ062541.1|BZ062541 lky43b12.b1 B.oleracea002 Brassica oleracea genomic	UAGCCAAGGAUGACUUGCCUG	NO	AGAAUGAGAAGUUGUGUGGUAGCCAAGGAUGACUUGCCUGCGUCUUAGACCAUAUCUAUCAAAGACUAAAAGAUUGAUAGUCUUCGAUGAAUUGGUUAAUCGGUAGGCAGUCUCCUCGGCUAUUCAGACAGUUCUCUUUCU	137	157	+ [Positive strand]	465	21	141	117	257	((((.(((((.((((.(((<<<<<-<<<<-<<<<-<<<<<(......(((((..((.(((.(((((((.........))))))).)))))..))))).....)))))))))))))).))))).))).))))))))).))))	-58.5	-41.4894	41.844	-1	-1	0.009901
Bju-miR169_2	gi|23676957|gb|BZ064835.1|BZ064835 llg97c03.b1 B.oleracea002 Brassica oleracea genomic	CAGCCAAGGAUGACUUGCCGA	NO	AGCCAAGGAUGACUUGCCGAUUUAAAAUAUCUGAUAAGUAUUUUAUUUCGUAUUUUAAAGAAAAAAAAUCAUGAUCGGCAAGUCGUCCUUGGCU	363	383	+ [Positive strand]	342	21	94	363	456	<<<<<<<<<<<<<<<<<<<<((((((((((..((((((...))))))..))))))))..((.......))..))))))))))))))))))))))	-44.5	-47.3404	32.9787	-1	-1	0.009901
Bju-miR169_3	gi|33775934|gb|CC943068.1|CC943068 BOICC84TF BO_1.4_1.6_KB_nc Brassica oleracea genomic clone BOICC84	UAGCCAAGGAUGACUUGCCUG	NO	UAGCCAAGGAUGACUUGCCUGCGUCUUUAACACCAUAUCAAAGACUUUAUCGAUAGUCUCUGAGUUGGUUAGGCUGUAGGCAGUCUCCUUGGCUA	624	644	- [Negative strand]	465	21	95	549	643	<<<<<<<<<<-<<<<-<<<<<(((((.....((((..(((.(((((........))))).)))..)))).)))).))))))))))))))))))))	-48.2	-50.7368	45.2632	-1	-1	0.009901
Bju-miR169_3	gi|33794709|gb|CC954204.1|CC954204 BOICM23TR BO_1.4_1.6_KB_nc Brassica oleracea genomic clone BOICM23	UAGCCAAGGAUGACUUGCCUG	NO	AGAAUGAGAAGUUGUGUGGUAGCCAAGGAUGACUUGCCUGCGUCUUAGACCAUAUCUAUCAAAGACUAAAAGAUUGAUAGUCUUCGAUGAAUUGGUUAAUCGGUAGGCAGUCUCCUCGGCUAUUCAGACAGUUCUCUUUCU	75	95	+ [Positive strand]	465	21	141	55	195	((((.(((((.((((.(((<<<<<-<<<<-<<<<-<<<<<(......(((((..((.(((.(((((((.........))))))).)))))..))))).....)))))))))))))).))))).))).))))))))).))))	-58.5	-41.4894	41.844	-1	-1	0.009901
Bju-miR169_3	gi|73675582|gb|DU101474.1|DU101474 JBnY025E24F Brassica naps BAC library JBnY Brassica naps genomic clone JBnY025E24	UAGCCAAGGAUGACUUGCCUG	NO	UAGCCAAGGAUGACUUGCCUGCGUCUUAACACCAUAUCACAGACUUUAUCGAUAGUCUCUGAGUUGGUUAGGCUGUAGGCAGUCUCCUCGGCUA	189	209	- [Negative strand]	465	21	94	115	208	<<<<<-<<<<-<<<<-<<<<<(((((....((((..(((.(((((........))))).)))..)))).)))).)))))))))))))).)))))	-44.8	-47.6596	47.8723	-1	-1	0.009901
Bju-miR171_3	gi|18876534|gb|BH741911.1|BH741911 gt39d03.g1 BoBds01 Brassica oleracea genomic clone gt39d03 5'	UGAUUGAGCCGUGCCAAUAUC	NO	GAUAUUGGUGCGGUUCAAUCAGAAAUCCACACUCUUUUGUUGUAGAGAUCGGUUUGUUUGAUUGAGCCGUGCCAAUAUC	151	171	- [Negative strand]	31	21	79	150	228	((((((((..(((((((((((((...((...((((........))))...))....))>>>>>>>>>>>-->>>>>>>>	-40.3	-51.0127	41.7722	-1	-1	0.009901
Bju-miR171_1	gi|224845342|gb|FI686281.1|FI686281 BOT01-3B22TF BOT01 Brassica oleracea genomic clone BOT01-3B22	UGAUUGAGCCGCGUCAAUAUC	UAUUGGCCUGGUUCACUCAGA(6)	CGAGAGUCCUCUUUGAUAUUGGCCUGGUUCACUCAGAUCUUCUCGAACCACACGCUCACAACUCUCUUAGUUAUCUGAUUGAGCCGCGUCAAUAUCUCAGUGCUCUCUCG	560	580	- [Negative strand]	2410	21	110	545	654	((((((..(.((..(({{{{{{{={{{{{{{={{{{{.......((.(.....).))..((((.....)))).))>>>->>>>>>>->>>>>>>>>..)).)..))))))	-38	-34.5455	48.1818	617	637	0.009901
Bju-miR171_2	gi|224874653|gb|FI715692.1|FI715692 BOT01-67E6TR BOT01 Brassica oleracea genomic clone BOT01-67E6	UGAUUGAGCCGCGCCAAUAUC	NO	ACGAAAGAGUCCCAUUUGAUAUUGCCUGGUUCAUUCAGAUCUUCUUGAACCACAUUAUAUGCAUUCUCUUAGAUAUCUGAUUGAGCCGCGCCAAUAUCUCAGUGCUCUCUCGU	724	744	- [Negative strand]	764	21	113	708	820	((((.((((..(.....((((((((.(((((((.((((((..(((.(((...(((...)))..)))....))).)))>>>->>>>>>>->->>>>>>>...)..)))).))))	-35.7	-31.5929	41.5929	-1	-1	0.009901
Bju-miR171_4	gi|23551370|gb|BZ003112.1|BZ003112 oem73h11.b1 B.oleracea002 Brassica oleracea genomic	AGAUAUUAGUGCGGUUCAAUC	CGAUUGAGCCGCGCCAAUAUC(1) GAUUGAGCCGCGCCAAUAUC(1)	GCGAGAUAUUAGUGCGGUUCAAUCAAAUAGUCGCACUCUUAGUAGAUAGAGAUUGAUUUUGUUCGAUUGAGCCGCGCCAAUAUCACGC	139	159	- [Negative strand]	15	21	88	74	161	(((-<<<<<<-<<<<<<<<<<<<<.(((((...((.((((........)))).))...)))))=}}}}}}}}}}}}}=}}}}}}.)))	-39.1	-44.4318	43.1818	77	97	0.009901
Bju-miR171_2	gi|73680855|gb|DU106747.1|DU106747 JBnY029F24R Brassica naps BAC library JBnY Brassica naps genomic clone JBnY029F24	UGAUUGAGCCGCGCCAAUAUC	UAUUGGCCUGGUUCACUCAGA(6)	ACGAAAGAGUCCUCUUUGAUAUUGGCCUGGUUCACUCAGAUUACACACGUACUAUAUGCAUUCUCUUAGUUAUCUGAUUGAGCCGCGCCAAUAUCUCAGUGCUCUCUCGU	721	741	+ [Positive strand]	764	21	110	646	755	((((.((((..((....(({{{{{{{={{{{{{{={{{{{(.........((((............)))).)))>>>->>>>>>>->>>>>>>>>..))..)))).))))	-42.1	-38.2727	43.6364	665	686	0.009901
Bju-miR172_1	gi|206711989|gb|CU946172.1|CU946172 CU946172 Brassica naps BAC library (JBnB) Brassica naps genomic clone JBnB017H02	AGAAUCUUGAUGAUGCUGCAU	NO	GGUGCAGCACCAUUAAGAUUCACAUGGAAAUUGAGAAAACCCUAAUUUAUAUUAAUUAGGGUUCUGAUAUGUAUAUGAGAAUCUUGAUGAUGCUGCAUC	157	177	+ [Positive strand]	2135	21	99	79	177	(((((((((.(((((((((((.((((.....(.(((..(((((((((......)))))))))))).)......))))->>>>>>>>>>>->>>>>>>>)	-45	-45.4545	34.3434	-1	-1	0.009901
Bju-miR172_1	gi|26766926|gb|BZ470162.1|BZ470162 BONRI77TR BO_1.6_2_KB_tot Brassica oleracea genomic clone BONRI77	AGAAUCUUGAUGAUGCUGCAU	NO	GGUGCAGCACCAUUAAGAUUCACAUGGAAAUUGAGAAAACCCUAAUUUAUAUUAAUUAGGGUUCUGAUAUGUAUAUGAGAAUCUUGAUGAUGCUGCAUC	100	120	+ [Positive strand]	2135	21	99	22	120	(((((((((.(((((((((((.((((.....(.(((..(((((((((......)))))))))))).)......))))->>>>>>>>>>>->>>>>>>>)	-45	-45.4545	34.3434	-1	-1	0.009901
Bju-miR172_1	gi|26786483|gb|BZ484085.1|BZ484085 BONRJ33TF BO_1.6_2_KB_tot Brassica oleracea genomic clone BONRJ33	AGAAUCUUGAUGAUGCUGCAU	NO	GGUGCAGCACCAUUAAGAUUCACAUGGAAAUUGAGAAAACCCUAAUUUAUAUUAAUUAGGGUUCUGAUAUGUAUAUGAGAAUCUUGAUGAUGCUGCAUC	624	644	+ [Positive strand]	2135	21	99	546	644	(((((((((.(((((((((((.((((.....(.(((..(((((((((......)))))))))))).)......))))->>>>>>>>>>>->>>>>>>>)	-45	-45.4545	34.3434	-1	-1	0.009901
Bju-miR172_1	gi|33778571|gb|CC945705.1|CC945705 BOIDN69TF BO_1.4_1.6_KB_nc Brassica oleracea genomic clone BOIDN69	AGAAUCUUGAUGAUGCUGCAU	GCAGCACCAUCAAGAUUCACA(8)	AGUCGUUUUUUGUAGGCGCAGCACCAUCAAGAUUCACAUGGAAUUGAAAAAUCUCCUAAUUUUUAAUUAGGGUUUUGAUAUGUAUAUGAGAAUCUUGAUGAUGCUGCAUCAACAACCGACGGCU	464	484	+ [Positive strand]	2135	21	124	375	498	(((((((..((((.(..{{{{{{={{{{{{{{{{{={{((..((...(((((..((((((.....)))))))))))...))...))))->>>>>>>>>>>->>>>>>--).))))..)))))))	-49.2	-39.6774	37.0968	392	413	0.009901
Bju-miR2111_2	gi|23520389|gb|BH986382.1|BH986382 oei10d05.b1 B.oleracea002 Brassica oleracea genomic	AUCCUCGGGAUACAGAUUACC	UAAUCUGCAUCCUGAGGUUU(1) UAAUCUGCAUCCUGAGGUUUA(5)	GAGGAACUGGUAAUCUGCAUCCUGAGGUUUAAAAAUACAUAGGCACAUGCAAAUGUGUGUAUUAUAGUUUUUAAUCCUCGGGAUACAGAUUACCUCUUCCUU	457	477	+ [Positive strand]	9	21	102	383	484	((((((..(({{{{{{{={{{{{{{{{={{{(((((..(((.((((((....)))))).)))....)))))))>->>>>>>>>>->>>>>>>>>..))))))	-51.4	-50.3922	37.2549	393	414	0.009901
Bju-miR390_1	gi|150144019|gb|EE544982.1|EE544982 9RDBNGA_UP_060_D12_02APR2005_090 Brassica naps - 9RDBNGA Brassica naps cDNA 5'	AAGCUCAGGAGGGAUAGCGCC	NO	AAGCUCAGGAGGGAUAGCGCCAUCAUGAUCACAGACAUCGAUAUUUUUGGCGCUGUCCAUCCUGAGUUU	459	479	- [Negative strand]	654	21	69	410	478	<<<<<<<<<<-<<<<<<<<<<(.....(((.........))).....))))))))))).))))))))))	-38.1	-55.2174	47.8261	-1	-1	0.009901
Bju-miR391_1	gi|23399557|gb|BH920920.1|BH920920 odh94b08.b1 B.oleracea002 Brassica oleracea genomic	UUCGCAGGAGAGAUAGCGCCA	UGGUGACGGUAUCUCUCCUAC(2) ACGGUAUCUCUCCUACGUAG(1) ACGGUAUCUCUCCUACGUAGC(28)	AGGUUCGCUUCGCAGGAGAGAUAGCGCCAUCACUUCUUCUUAAGAGUUUAGAAGAUGGUGACGGUAUCUCUCCUACGUAGCAAUCCU	430	450	+ [Positive strand]	441	21	87	421	507	(((...((<-<<-<<<<<<<<<<-<<-<<((((((((.((....))...))))).)))))=}}=}}}}}}}}}}=}}=}}}...)))	-39.5	-45.4023	47.1264	481	502	0.009901
Bju-miR391_1	gi|27009951|gb|BZ496977.1|BZ496977 BONOM68TR BO_1.6_2_KB_tot Brassica oleracea genomic clone BONOM68	UUCGCAGGAGAGAUAGCGCCA	UGGUGACGGUAUCUCUCCUAC(2) ACGGUAUCUCUCCUACGUAG(1) ACGGUAUCUCUCCUACGUAGC(28)	AGGUUCGCUUCGCAGGAGAGAUAGCGCCAUCACUUCUUCUUAAGAGUUUAGAAGAUGGUGACGGUAUCUCUCCUACGUAGCAAUCCU	325	345	+ [Positive strand]	441	21	87	316	402	(((...((<-<<-<<<<<<<<<<-<<-<<((((((((.((....))...))))).)))))=}}=}}}}}}}}}}=}}=}}}...)))	-39.5	-45.4023	47.1264	376	397	0.009901
Bju-miR393_1	gi|224906910|gb|FI747639.1|FI747639 BOT01-100O8TR BOT01 Brassica oleracea genomic clone BOT01-100O8	UCCAAAGGGAUCGCAUUGAUCC	GAUCAUGCGAUCUCAUUGGAUU(1) AUCAUGCGAUCUCAUUGGAUU(26)	AGCAACUAGAGAAAGGAUCCAAAGGGAUCGCAUUGAUCCAAAUUAAGCUGAAUUAUUCCCCAAUAGUUAUUCUUUUUCUCAAUCGAAAGAUGAAAAGAAGACUUGCUUCAUUUUCUGGAUCAUGCGAUCUCAUUGGAUUCAUUCUUUGGUAGCU	536	557	+ [Positive strand]	151	22	154	518	671	(((.(((((((((.(((<<<<<-<<<<<<<<<<-<<<<<((((.((((..(((((((....)))))))..(((((((.(((.((....))))).)))))))...)))).)))...)))}}}}}}}}}}}}}=}}}}}}}).))))))))).)))	-65.9	-42.7922	36.3636	636	657	0.009901
Bju-miR393_1	gi|73675807|gb|DU101699.1|DU101699 JBnY028K12F Brassica naps BAC library JBnY Brassica naps genomic clone JBnY028K12	UCCAAAGGGAUCGCAUUGAUCC	AUCAUGCGAUCUCUUCGGAUU(10)	AGCAACUAGAGAAAGGAUCCAAAGGGAUCGCAUUGAUCCUAAUCAAGCUGAGUUAUUCCCGAAUAAUUAUUUUAAUUUUUUCUCAAUGGAAAGAUAGAAAAAAAAAAUUUUGCUUCGUUUUCCGGAUCAUGCGAUCUCUUCGGAUUCAUCCUCUGGUAGCU	116	137	+ [Positive strand]	151	22	161	98	258	(((.(((((((...(((<<<-<<<<<<<<<<<<-<<<<<.(((.((((..(((((((....))))))).((((.((((((((.....)))))))).))))...........)))).)))....))}}}}}}}}}}}}}}}=}}}}})...))))))).)))	-59.7	-37.0807	36.0248	223	244	0.009901
Bju-miR394_1	gi|23640133|gb|BZ045545.1|BZ045545 lkg58c01.b1 B.oleracea002 Brassica oleracea genomic	UUGGCAUUCUGUCCACCUCC	AGGUGGGCAUACUGCCAACA(1)	CAGAGAUCUUUGGCAUUCUGUCCACCUCCCCUACCUAUGUAUAUGUGUAUUAUCUGCGUUGUGUUUUGUGAGGGGGAGGUGGGCAUACUGCCAACAGAGAUCUG	325	344	+ [Positive strand]	184	20	104	315	418	((((..(((<<<<<<-<-<<<<<<<<<<<((((((.(((((.(((.....))).))))).).)).......)))))}}}}}}}}}=}=}}}}}}=}))..))))	-47.01	-45.2019	48.0769	391	411	0.009901
Bju-miR395_1	gi|18769890|gb|BH697187.1|BH697187 BOMLX23TF BO_2_3_KB Brassica oleracea genomic clone BOMLX23	CUGAAGUGUUUGGGGGAACUC	GUUCCUCUGAGCACUUCAUUG(3) UUCCUCUGAGCACUUCAUUGG(1)	UCCUAGAGUUCCUCUGAGCACUUCAUUGGGUAUACAAUUUCUUAUGAAGAUUACCCACUGAAGUGUUUGGGGGAACUCCUGGA	151	171	+ [Positive strand]	150	21	83	93	175	(((..(({{{{{{{=={{{{{{{{{={{((((.....((((....))))..))))))->>>>>>>>>-->>>>>>>>>..)))	-46.6	-56.1446	43.3735	100	121	0.009901
Bju-miR395_2	gi|23424238|gb|BH944178.1|BH944178 ob90f04.b1 B.oleracea002 Brassica oleracea genomic	CUGAAGUGUUUGGGGGGACUC	NO	GAGUUCCCUUUAACGCUUCAUUGUUCAGACUUGGUUGUCUAAUAUCUACCGAUACAUCAACGUAAUGAACACUGAAGUGUUUGGGGGGACUC	126	146	+ [Positive strand]	50	21	92	54	145	(((((((((..(((((((((.((((((.(((((((((((...........)))).))))).))..))))))->>>>>>>>>-->>>>>>>>>	-39.7	-43.1522	42.3913	-1	-1	0.009901
Bju-miR395_1	gi|23723565|gb|BZ089005.1|BZ089005 lkg71b12.g1 B.oleracea002 Brassica oleracea genomic	CUGAAGUGUUUGGGGGAACUC	GUUCCUCUGAGCACUUCAUUG(3) UUCCUCUGAGCACUUCAUUGG(1)	UCCUAGAGUUCCUCUGAGCACUUCAUUGGAGAUACCGUUUAUUUUCUAUCAAAAUGUAUUCCACUGAAGUGUUUGGGGGAACUCCUGGA	384	404	- [Negative strand]	150	21	89	378	466	(((..(({{{{{{{=={{{{{{{{{={{(((.(((.((((...........))))))))))))->>>>>>>>>-->>>>>>>>>..)))	-42.7	-47.9775	41.573	438	458	0.009901
Bju-miR397_1	gi|206699191|gb|CU934632.1|CU934632 CU934632 Brassica naps BAC library (JBnB) Brassica naps genomic clone JBnB073E23	UCAUUGAGUGCAGCGUUGAUGU	NO	AUUGAGUGCAGCGUUGAUGUGAUUUACUUUUUUCAUUGUUGAAUGGAUUAAAGCAAUUUACAUCAAUGUUGGCUCAAU	666	687	+ [Positive strand]	110	22	78	667	744	<<<<<<<-<<<<<<<<<<<<((.((.((((.((((((....))))))..)))).)).)))))))))))))))))))))	-31.2	-40	32.0513	-1	-1	0.009901
Bju-miR397_1	gi|308673415|gb|DK495288.1|DK495288 DK495288 fll-length kale cDNA library (capsles) Brassica oleracea var. acephala cDNA clone KALE-103O08 5'	UCAUUGAGUGCAGCGUUGAUGU	NO	GAACAUCAUUGAGUGCAGCGUUGAUGUGAUUUACUUUUUUUUAUUGUUGAAUGGAUUAAAGCAAUUUACAUCAAUGUUGGCUCAAUUAUGUUU	41	62	+ [Positive strand]	110	22	93	35	127	(((((<-<<<<<<<-<<<<<<<<<<<<((.((.((((..((((((....))))))..)))).)).))))))))))))))))))))).))))))	-36.9	-39.6774	30.1075	-1	-1	0.009901
Bju-miR398_1	gi|23399352|gb|BH920803.1|BH920803 odg93d08.b1 B.oleracea002 Brassica oleracea genomic	GGAGUGUCAUGAGAACACGGA	NO	UCAAAGGAGUGUCAUGAGAACACGGAUCCUCUUGUUUCUUUAAGAUUUCCACUGAAACCAUUGAGUAUUGUGUUCUCAGGUCACCCCUUUGA	319	339	- [Negative strand]	234	21	92	252	343	(((((<<-<<<-<-<<<<<<<<<<<-..(((..(((((...............)))))....)))..))))))))))).).))).)))))))	-33.76	-36.6957	41.3043	-1	-1	0.009901
Bju-miR399_1	gi|18755339|gb|BH684896.1|BH684896 BOHVJ40TF BO_2_3_KB Brassica oleracea genomic clone BOHVJ40	UGCCAAAGGAGAGUUGCCCUG	NO	GGGCAUCUUUCUAUUGGCACGCGACUGUGCCAUUUGCUCUCUUUUCUUGUGUGUUUGGAUCUGUCACUUGCCAAAGGAGAGUUGCCC	155	175	- [Negative strand]	6	21	87	156	242	(((((.((((((.((((((.(.(((....(((..(((.(.........).)))..)))....))).).>>>>>>->>>>>>->>>>>	-36	-41.3793	49.4253	-1	-1	0.009901
Bju-miR399_3	gi|224847319|gb|FI688357.1|FI688357 BOT01-23G10TF BOT01 Brassica oleracea genomic clone BOT01-23G10	UGCCAAAGGAGAUUUGCCCGG	NO	GGGCAAGAUCUCUAUUGGCAGAAAACCAUUACUUAGAUCUUUGCAUCUCUUUCUGCAUUGAUUUGUAGUGAGUUCUCUGCCAAAGGAGAUUUGCCC	786	806	+ [Positive strand]	4	21	96	708	803	(((((.(((((((.((((((((.(((((((((..(((((..((((........))))..))))))))))).))).))>>>>>>->>>>>>>>>>>>	-47.7	-49.6875	41.6667	-1	-1	0.009901
Bju-miR399_1	gi|224887075|gb|FI728423.1|FI728423 BOT01-75B3TR BOT01 Brassica oleracea genomic clone BOT01-75B3	UGCCAAAGGAGAGUUGCCCUG	NO	GAGGAGCAGUAAUAGGGCAUCUUUCUAUUGGCACGAGACAGUGAGAUGUGCUCUUUUUGUGUGUGUGUUCAUGGCUACUUGGCUCUGUCACUUGCCAAAGGAGAGUUGCCCUGUCACUGCUUCC	692	712	- [Negative strand]	6	21	124	680	803	(.((((((((.((((((((.((((((.((((((.(.(((((.((((((..(.(.....).)..))).)))..((((....))))))))).).>>>>>>->>>>>>->>>>>>>).)))))))))	-57.2	-46.129	49.1936	-1	-1	0.009901
Bju-miR403_1	gi|23416269|gb|BH936203.1|BH936203 odf48c07.g1 B.oleracea002 Brassica oleracea genomic	UUAGAUUCACGCACAAACUCG	ACAUGUUUUGUGCGUGAAUCUA(2) UACAUGUUUUGUGCGUGAAUCU(2) UACAUGUUUUGUGCGUGAAUC(1) UGUUUUGUGCGUGAAUCUAAU(2) UUACAUGUUUUGUGCGUGAAUC(6) UGUUUUGUGCGUGAAUCUAAUU(23) UUUUGUGCGUGAAUCUAAUU(1) UUACAUGUUUUGUGCGUGAA(2)	GAAGAGUCAUAUUACAUGUUUUGUGCGUGAAUCUAAUUCAUAUUCUCAUGUAGUAAUCAUAUCUUGUUGUUGGAUUAGAUUCACGCACAAACUCGUAAUCUGUCUUUUC	64	84	- [Negative strand]	574	21	109	49	157	((((((.((.(((((.={{{{={{{{{{{{{{{{{{{{((......((.(((.......)))..))....))))>>>>>>>>>>>>>>>>>>-->)))).)).))))))	-41.3	-37.8899	33.0275	119	140	0.009901
Bju-miR858_1	gi|151291156|gb|EV197817.1|EV197817 0098970 Brassica naps Cold acclimation - light Brassica naps cDNA	UUCGUUGUCUGUUCGACCUUG	NO	GGUUGGGUUCGAUGCUAGGCUUGUCAAAGUGAGCAAUCUUAUUUGUUCUCAUCUUUGUUUCGUUGUCUGUUCGACCUUGGCC	139	159	+ [Positive strand]	27	21	82	80	161	(((..((.((((.((.((((.((.(((((.((((((......))))))....))))).-->>-->>>>>>>>>>->>--)))	-27	-32.9268	45.1219	-1	-1	0.009901
