# Supplementary material for: A Genome-Wide Perspective of miRNAome in Response to High Temperature, Salinity and Drought Stresses in Brassica juncea (Czern) L
Source: PLoS One. 2014 Mar 26;9(3):e92456. doi: 10.1371/journal.pone.0092456 (PMC3966790; doi:10.1371/journal.pone.0092456)
Supplement: Table S5 — Variants of conserved miRNA sequences identified in B. juncea. (XLSX) [file pone.0092456.s009.xlsx]

## Sheet: Table S5
Table S5: Variants of miRNAs reported in miRBase. The conserved miRNA sequences identified in B. juncea was removed from putative small RNA population after which a maximum of two base mismatch
was allowed in blast search against reported miRNAs in miRBase. The miRNA family and sequences of thus identified variant miRNAs with their absolute counts in BJC (B. juncea control), BJH (B. juncea high temperature stressed), BJS (B. juncea salinity stressed) and BJD (B. juncea drought stressed) libraries were indicated.
Vraiant ID	VarianU sequence	Reads BJC	Reads BJH	Redas BJS	Reads BJD	Total reads
Bju_variant_156_1	UGACAGACGAGAGGGAGCAC	8	2	4	6	20
Bju_variant_156_2	UUGACAGGAGAUAGAGAGCAC	5	3	6	6	20
Bju_variant_156_3	UGACAGCAGAGAGCGAGCAC	9	6	3	2	20
Bju_variant_156_4	UUGACAGAAGAUGGAGAGCAC	6	3	5	7	21
Bju_variant_156_5	UUGACAGAAGAUUGAGAGCAC	2	2	8	9	21
Bju_variant_156_6	UGACAGAAGAGCUUGAGCAC	10	6	3	2	21
Bju_variant_156_7	UUGACAGAGGAUAGAGAGCAC	3	2	10	7	22
Bju_variant_156_8	UUGACCGAAGAGAGUGAGCAC	17	3	1	1	22
Bju_variant_156_9	UGACAGAAGAGAGCCAGCAC	4	10	5	4	23			Table
Bju_variant_156_10	UGACAGAAGAGAUCGAGCAC	6	16	1	0	23
Bju_variant_156_11	UGACAGACGAGAGAGAGCAC	4	16	2	1	23
Bju_variant_156_12	UUGACGGAAGAUAGAGAGCAC	5	5	9	6	25
Bju_variant_156_13	UGACAGAAGAGACCGAGCAC	3	13	7	3	26
Bju_variant_156_14	UGACAGAAGAGCGUGCGCAC	8	6	10	2	26
Bju_variant_156_15	UGACAGAAGAGAGAGCGCAC	8	8	3	8	27
Bju_variant_156_16	UUGAUAGAAGAGAGUGAGCAC	9	3	6	9	27
Bju_variant_156_17	CGACCGAAGAGAGUGAGCAC	0	2	0	28	30
Bju_variant_156_18	UGACAGAAGAGACAGAGCAC	3	9	13	5	30
Bju_variant_156_19	UUGACAGAAGAGAUUGAGCAC	6	6	10	8	30
Bju_variant_156_20	UUGACAGAAGAUAGUGAGCAC	13	9	5	7	34
Bju_variant_156_21	UGACAGAAGAGAGGUAGCAC	3	22	5	6	36
Bju_variant_156_22	UUGACUGAAGAUAGAGAGCAC	5	5	16	10	36
Bju_variant_156_23	UGACAGAAGAGAGGGCGCAC	17	6	6	8	37
Bju_variant_156_24	UGACAGAAGAGAUUGAGCACA	11	9	9	8	37
Bju_variant_156_25	UUGACAGAAGAUAGGGAGCAC	8	3	16	13	40
Bju_variant_156_26	UGACAGACGAGAGCGAGCAC	5	36	4	0	45
Bju_variant_156_27	UGACAGAAGAGAGCGCGCAC	11	23	9	4	47
Bju_variant_156_28	UUGACAGAAUAUAGAGAGCAC	14	8	23	15	60
Bju_variant_156_29	UUGACACAAGAUAGAGAGCAC	15	14	23	9	61
Bju_variant_156_30	UGACAGUAGAGAGUGAGCAC	18	20	21	16	75
Bju_variant_156_31	UUGACAGACGAUAGAGAGCAC	18	36	25	7	86
Bju_variant_156_32	UUGACAGAACAUAGAGAGCAC	22	25	29	15	91
Bju_variant_156_33	UUGACAGAAGACAGAGAGCAC	21	30	28	13	92
Bju_variant_156_34	UUGACAGCAGAUAGAGAGCAC	26	23	38	11	98
Bju_variant_156_35	UUGACAGAAGAUAUAGAGCAC	19	32	26	22	99
Bju_variant_156_36	UUGACAUAAGAUAGAGAGCAC	25	19	37	21	102
Bju_variant_156_37	UUGAUAGAAGAUAGAGAGCAC	35	15	33	25	108
Bju_variant_156_38	UUGACAGAAGAUCGAGAGCAC	21	55	34	8	118
Bju_variant_156_39	UUGACAGAAGAUAGAUAGCAC	29	16	41	37	123
Bju_variant_156_40	UUGACAGAAGAUAGACAGCAC	26	27	58	25	136
Bju_variant_156_41	UUGACCGAAGAUAGAGAGCAC	89	19	22	7	137
Bju_variant_156_42	UGACAGAAGAGAGUGUGCAC	59	17	24	38	138
Bju_variant_156_43	UUGACAGAAGAUAGCGAGCAC	26	72	50	13	161
Bju_variant_156_44	UGACAGAAGAAAGUGAGCAC	50	43	30	38	161
Bju_variant_156_45	UUGAAAGAAGAUAGAGAGCAC	72	20	33	42	167
Bju_variant_156_46	UUGACAGAAGAUACAGAGCAC	26	78	43	25	172
Bju_variant_156_47	UGACAAAAGAGAGUGAGCAC	58	62	50	41	211
Bju_variant_156_48	UGACUGAAGAGAGUGAGCAC	57	75	35	56	223
Bju_variant_156_49	UGACAGAAAAGAGUGAGCAC	86	56	67	57	266
Bju_variant_156_50	UGACAGGAGAGAGUGAGCAC	96	52	61	65	274
Bju_variant_156_51	UUGACAGAAGAUAGAGCGCAC	64	74	92	47	277
Bju_variant_156_52	UGACAGAUGAGAGUGAGCAC	60	134	48	55	297
Bju_variant_156_53	UGACAGAAGAGAAUGAGCAC	87	91	59	67	304
Bju_variant_156_54	UGACGGAAGAGAGUGAGCAC	123	61	71	76	331
Bju_variant_156_55	UGACAGAAGAGAGUGGGCAC	150	84	78	110	422
Bju_variant_156_56	UGACAGAAGAGUGUGAGCAC	112	115	118	143	488
Bju_variant_156_57	UGACAGAAGAGAGUAAGCAC	162	202	121	117	602
Bju_variant_156_58	UGACACAAGAGAGUGAGCAC	420	396	273	149	1238
Bju_variant_156_59	UGACAUAAGAGAGUGAGCAC	468	329	289	281	1367
Bju_variant_156_60	UGACAGAAUAGAGUGAGCAC	492	332	344	372	1540
Bju_variant_156_61	UGACAGCAGAGAGUGAGCAC	491	562	341	195	1589
Bju_variant_156_62	UGACAGAAGAUAGUGAGCAC	588	402	352	371	1713
Bju_variant_156_63	UGACAGAAGACAGUGAGCAC	482	614	386	253	1735
Bju_variant_156_64	UGACAGAAGAGCGUGAGCAC	384	963	329	177	1853
Bju_variant_156_65	UGACCGAAGAGAGUGAGCAC	182	683	253	740	1858
Bju_variant_156_66	UGACAGAACAGAGUGAGCAC	557	667	447	257	1928
Bju_variant_156_67	UGACAGACGAGAGUGAGCAC	522	942	399	212	2075
Bju_variant_156_68	UGACAGAAGAGAGUUAGCAC	690	841	421	377	2329
Bju_variant_156_69	UGACAGAAGAGAGUCAGCAC	586	1130	448	284	2448
Bju_variant_156_70	UGACAGAAGAGAGUGCGCAC	934	842	546	408	2730
Bju_variant_156_71	UGACAGAAGAGACUGAGCAC	923	911	688	538	3060
Bju_variant_156_72	UGACAGAAGAGAUUGAGCAC	1543	1072	962	1066	4643
Bju_variant_159_1	UUUGUAUUGAAGGGAGCUCUA	5	2	2	16	25
Bju_variant_159_2	UUUGGAUUGAAGGGAGUUCUA	14	5	6	21	46
Bju_variant_164_1	UGGAGAAGCAGGGAACGUGCA	8	3	9	11	31
Bju_variant_165_1	UCGGACCAGGCUUCACCCCC	8	3	7	5	23
Bju_variant_165_2	UCGGACCAGGCUCCAUCCCCC	9	5	7	3	24
Bju_variant_165_3	UCGGACCAGGCUUGAUCCCCC	7	4	5	9	25
Bju_variant_165_4	UCGGACCCGGCUUCAUCCCCC	7	8	8	2	25
Bju_variant_165_5	UCGGACCAGGCUUCCUCCCCC	5	14	16	9	44
Bju_variant_165_6	UCGGAUCAGGCUUCAUCCCCC	9	8	15	14	46
Bju_variant_165_7	UCGGACCAGGCUUAAUCCCCC	15	7	21	19	62
Bju_variant_165_8	UCGGACCAGGCUUCUUCCCC	14	5	28	16	63
Bju_variant_165_9	UCGGACUAGGCUUCAUCCCCC	19	13	36	20	88
Bju_variant_165_10	UCGGACCAGGCUUUAUCCCCC	32	17	31	28	108
Bju_variant_165_11	UCGGACCAGGCUUCACCCCCC	57	30	67	35	189
Bju_variant_166_1	UCGGACCAGACUUCAUUCCCC	5	6	5	4	20
Bju_variant_166_2	UCGGACCAGGCUGCAUUCCCC	4	1	10	5	20
Bju_variant_166_3	UCGGACCAAGCUUCAUUCCCC	3	4	9	6	22
Bju_variant_166_4	UCGGACCGGGCUUCAUUCCCC	3	4	14	4	25
Bju_variant_166_5	UCGGAACAGGCUUCAUUCCCC	7	4	13	6	30
Bju_variant_166_6	UCGGACCAGGCUUCAUGCCCC	4	1	18	9	32
Bju_variant_166_7	UCGGACCAGGCGUCAUUCCCC	5	6	12	10	33
Bju_variant_166_8	UCGGACCAGGCUUCAUACCCC	8	5	15	8	36
Bju_variant_166_9	UCGGACCUGGCUUCAUUCCCC	7	12	13	6	38
Bju_variant_166_10	UCGGACAAGGCUUCAUUCCCC	7	12	13	7	39
Bju_variant_166_11	UCGGACCAGUCUUCAUUCCCC	10	6	15	8	39
Bju_variant_166_12	UCGGACCAGCCUUCAUUCCCC	9	9	23	2	43
Bju_variant_166_13	UCGGACCAGGCUUCAGUCCCC	10	2	20	14	46
Bju_variant_166_14	UCGGACCAUGCUUCAUUCCCC	16	4	35	19	74
Bju_variant_166_15	UCGGACCACGCUUCAUUCCCC	20	17	46	6	89
Bju_variant_166_16	UCGGACCAGGCCUCAUUCCCC	17	18	40	14	89
Bju_variant_166_17	UCGGCCCAGGCUUCAUUCCCC	12	33	20	40	105
Bju_variant_166_18	UCGGACCAGGCUUCUUUCCCC	29	13	45	23	110
Bju_variant_166_19	UCGGACCAGGCUUGAUUCCCC	24	18	29	50	121
Bju_variant_166_20	UCGGACCAGGCUUCGUUCCCC	33	17	37	41	128
Bju_variant_166_21	UCGGACCAGGCUUCACUCCCC	27	23	62	24	136
Bju_variant_166_22	UCGGACCCGGCUUCAUUCCCC	35	39	65	15	154
Bju_variant_166_23	UCGGACCAGGCUUCCUUCCCC	67	106	156	88	417
Bju_variant_166_24	UCGGACCAGGCUUAAUUCCCC	95	61	184	106	446
Bju_variant_166_25	UCGGACUAGGCUUCAUUCCCC	88	73	196	102	459
Bju_variant_166_26	UCGGACCAGGCUUUAUUCCCC	136	54	165	136	491
Bju_variant_167_1	UGAAGCUGCCAGUAUGAUCUA	6	2	2	10	20
Bju_variant_167_2	UGAAGCUUCCAGCAUGAUCUA	4	2	6	8	20
Bju_variant_167_3	UGAAGCUGCCAGGAUGAUCUA	7	1	3	10	21
Bju_variant_167_4	UGAAGCUGCCAGCCUGAUCUA	6	13	2	1	22
Bju_variant_167_5	UGAAGCUGUUAGCAUGAUCUA	5	1	5	13	24
Bju_variant_167_6	UGAAGCUGCCAGCAUUAUCUA	6	2	3	14	25
Bju_variant_167_7	UGAACCUGCCAGCAUGAUCUA	4	9	5	7	25
Bju_variant_167_8	UGAAGCUCCCAGCAUGAUCUA	6	2	4	16	28
Bju_variant_167_9	UGAAGCUGCCAGCACGAUCUA	3	6	8	12	29
Bju_variant_167_10	UGAAGCUGCCAGCAUCAUCUA	7	3	7	13	30
Bju_variant_167_11	UGAAUCUGCCAGCAUGAUCUA	6	5	6	13	30
Bju_variant_167_12	UGAAGCUGCAAGCAUGAUCUA	9	4	7	11	31
Bju_variant_167_13	UGAAGCUGCCAGCAUGCUCUA	29	8	20	20	77
Bju_variant_167_14	UGAAGCUGCCAGAAUGAUCUA	32	13	15	49	109
Bju_variant_167_15	UGAAGUUGCCAGCAUGAUCUA	31	14	20	47	112
Bju_variant_167_16	UGAAGCUGUCAGCAUGAUCUA	44	19	25	79	167
Bju_variant_167_17	UGAAGCUGCUAGCAUGAUCUA	124	59	92	165	440
Bju_variant_168_1	UCGCUUGGGCAGGUCGGGAC	7	3	7	4	21
Bju_variant_168_2	UCGCUUUGUGCAGGUCGGGAA	9	4	3	6	22
Bju_variant_168_3	UCGCUUGUUGCAGGUCGGGAA	7	1	8	7	23
Bju_variant_168_4	UCGCCUGGUGCAGGUCGGGAA	6	6	11	3	26
Bju_variant_168_5	UCGCUUGGUGCAGGACGGGAA	6	6	6	8	26
Bju_variant_168_6	UCGCUUGGUCCAGGUCGGGAA	7	7	7	6	27
Bju_variant_168_7	UCGCUUCGUGCAGGUCGGGAA	8	3	13	8	32
Bju_variant_168_8	UCGCUUGGUGCAGUUCGGGAC	11	7	7	11	36
Bju_variant_168_9	UCGCUUGGUGCCGGUCGGGAA	12	12	11	2	37
Bju_variant_168_10	UCGCUUGCUGCAGGUCGGGAA	10	11	16	6	43
Bju_variant_168_11	UCGCUUGGUGCAGGUCCGGAA	13	6	19	5	43
Bju_variant_168_12	UCGCUUGGUGCAGUUCGGGAA	16	7	12	8	43
Bju_variant_168_13	UCGCUUGGUGCAUGUCGGGAA	12	9	9	14	44
Bju_variant_168_14	UCGCUUGGUGCAGGUAGGGAA	16	4	13	14	47
Bju_variant_168_15	UCGCUUGGUGCAGGUCUGGAA	22	3	15	13	53
Bju_variant_168_16	UCGCUUGGUGCACGUCGGGAA	23	6	19	9	57
Bju_variant_168_17	UCGCUCGGUGCAGGUCGGGAA	25	10	12	13	60
Bju_variant_168_18	UCGCUUGGUGCAGGCCGGGAA	21	12	19	19	71
Bju_variant_168_19	UCGCUUGGGGCAGGUCGGGAA	30	4	13	27	74
Bju_variant_168_20	UCGCUUGGCGCAGGUCGGGAA	21	19	19	16	75
Bju_variant_168_21	UCGCUUGGUGCAGGGCGGGAA	43	11	19	29	102
Bju_variant_171_1	UGAUUGAGCCGCGUAAAUAUC	6	5	6	7	24
Bju_variant_171_2	UGAUUGAGCUGCGCCAAUAUC	4	1	11	9	25
Bju_variant_171_3	UGAUUGAGCCGCGUCACUAUC	6	6	7	6	25
Bju_variant_171_4	UGAUUGAGCUGCGUCAAUAUC	13	5	11	24	53
Bju_variant_171_5	UGAUUGAGUCGCGUCAAUAUC	16	5	13	31	65
Bju_variant_1885_1	AGGAAUCAUACUUUCAUUGAU	16	5	10	40	71
Bju_variant_319_1	UUGGACUGAAGGGAGUUCCCU	7	7	24	6	44
Bju_variant_408_1	AUGCAUUGCCUCUUCCCUGGC	5	1	6	8	20
Bju_variant_408_2	UGCAUUGCCUCUUCCCUGGCU	13	0	4	18	35
