# Supplementary material for: A Genome-Wide Perspective of miRNAome in Response to High Temperature, Salinity and Drought Stresses in Brassica juncea (Czern) L
Source: PLoS One. 2014 Mar 26;9(3):e92456. doi: 10.1371/journal.pone.0092456 (PMC3966790; doi:10.1371/journal.pone.0092456)
Supplement: Table S6 — True novel miRNA sequences identified in B. juncea with their absolute counts, normalized counts and fold change values in control and different abiotic stress conditions. (XLSX) [file pone.0092456.s010.xlsx]

## Sheet: Table S6
Table S6: Expression and fold change summary of true novel miRNAs identified in B. juncea. The sequences of true novel miRNAs with their absolute counts, normalized counts and fold change values
in BJC (B. juncea control), BJH (B. juncea high temperature stressed), BJS (B. juncea salinity stressed) and BJD (B. juncea drought stressed) libraries were indicated.
ID	miRNA Sequence	Reads BJC	Reads BJH	Reads BJS	Reads BJD	TPM BJC	TPM BJH	TPM BJS	TPM BJD	Fold change BJH	Fold change BJS	Fold change BJD
Bju-N1	UCGCUUGGUGCAGGUCGGGAC	6575	1899	5052	3286	1225.01	645.956	993.179	596.093	-0.923292	-0.302673	-1.03919
Bju-N2	UUUCCAAAUGUAGACAAAGCA	3340	1053	2660	4759	622.289	358.184	522.933	863.301	-0.796883	-0.250958	0.472279
Bju-N3	UUGUGUUGUGAUGAUAAUCC	388	141	390	444	72.2898	47.962	76.6706	80.5433	-0.591902	0.0848811	0.155972
Bju-N4	ACAGGGAACAAGCAGAGCAUG	155	60	139	172	28.8787	20.4093	27.3262	31.2015	-0.500775	-0.0797197	0.111609
Bju-N5	AUAAAUCCCAAGCAUCAUCCA	146	40	90	337	27.2018	13.6062	17.6932	61.1331	-0.999437	-0.620508	1.16825
Bju-N6	UUUCAUCUUAGAGAAUGUUGUU	47	13	14	79	8.75676	4.42202	2.75228	14.3309	-0.98569	-1.66977	0.710661
Bju-N7	UGGGGUUGUGAUUUCAGGCUU	46	24	53	28	8.57044	8.16374	10.4193	5.07931	-0.0701402	0.281822	-0.754738
Bju-N8	UGAAGCUGCCAGCAUGAUCU	35	13	26	75	6.52099	4.42202	5.11137	13.6053	-0.560384	-0.35138	1.061
Bju-N9	UCGGGAAGAUUAUGAGAGCAUG	26	10	18	29	4.84416	3.40156	3.53864	5.26071	-0.510052	-0.453051	0.11901
Bju-N10	GGGUCGACAUGAGAACACAUG	24	10	11	26	4.47154	3.40156	2.1625	4.7165	-0.394575	-1.04807	0.0769462
Bju-N11	UCCACCCAUACCAUACAGACCC	22	8	13	31	4.09891	2.72125	2.55569	5.62352	-0.590972	-0.681528	0.456234
Bju-N12	AGCUUUGCGGUUGGUAGCGGUU	19	4	13	22	3.53997	1.36062	2.55569	3.99088	-1.37947	-0.470024	0.172973
Bju-N13	AGUUUGCGGAUGCGGAUGGUU	14	8	12	12	2.6084	2.72125	2.3591	2.17685	0.0611043	-0.144929	-0.260923
Bju-N14	GCCGACUAGGGAUCAGCGGAU	13	11	24	15	2.42208	3.74171	4.71819	2.72106	0.627451	0.961986	0.16792
Bju-N15	GAAGCGAUUUGUAGCGGUUUA	13	9	16	3	2.42208	3.0614	3.14546	0.544212	0.337945	0.377024	-2.15401
Bju-N16	UUGGAAAGAUUAUGAGAGCAUG	13	1	15	18	2.42208	0.340156	2.94887	3.26527	-2.83198	0.283915	0.430954
Bju-N17	GUUCGGACGCGGCGUCAGACG	12	10	9	13	2.23577	3.40156	1.76932	2.35825	0.605425	-0.337574	0.0769462
Bju-N18	AAGGGAACGGGCUUGGCAGAC	12	5	1	2	2.23577	1.70078	0.196591	0.362808	-0.394575	-3.5075	-2.62349
Bju-N19	ACUGUUAACUGCGGGGCGGAGC	9	1	0	2	1.67683	0.340156	0	0.362808	-2.30147	-	-2.20846
Bju-N20	GUCGGCCGGGGACGGACUGGGA	8	2	26	10	1.49051	0.680311	5.11137	1.81404	-1.13154	1.7779	0.283397
Bju-N21	AAGGGAACGGGCUUGGCAGAU	8	12	5	2	1.49051	4.08187	0.982957	0.362808	1.45342	-0.600608	-2.03853
Bju-N22	AUGUAUGGCUGGGAAGGGCGC	7	3	5	5	1.3042	1.02047	0.982957	0.907019	-0.353933	-0.407963	-0.523958
Bju-N23	AAAGCUUUUAACUUUGAAAACU	6	0	0	10	1.11788	0	0	1.81404	-	-	0.698435
Bju-N24	AGCGGAUUGGUUAGUGCGGUG	6	4	8	5	1.11788	1.36062	1.57273	0.907019	0.283497	0.492501	-0.301565
Bju-N25	CCGGGGGACGGACUGGGAAA	6	2	3	1	1.11788	0.680311	0.589774	0.181404	-0.716503	-0.922536	-2.62349
Bju-N26	GUUUGCGGAUGCGGAUGGUU	6	2	1	10	1.11788	0.680311	0.196591	1.81404	-0.716503	-2.5075	0.698435
Bju-N27	CGUGUCGGCCGGGGGACGGCC	5	11	11	3	0.93157	3.74171	2.1625	0.544212	2.00596	1.21497	-0.775497
Bju-N28	AUACGGGGGGACACGGGCUUGG	5	5	1	4	0.93157	1.70078	0.196591	0.725615	0.868459	-2.24446	-0.360459
Bju-N29	UGCGGACGGUUGCGGGAGGAUA	4	3	8	6	0.745256	1.02047	1.57273	1.08842	0.453422	1.07746	0.546431
Bju-N30	AAGGGAACGGGCUUGGCCGAA	4	4	3	0	0.745256	1.36062	0.589774	0	0.868459	-0.337574	-
Bju-N31	GUCCGGAGACGUCGGCGGGAU	4	5	2	5	0.745256	1.70078	0.393183	0.907019	1.19039	-0.922536	0.283397
Bju-N32	GUCGGCCGGGGGACGGACUGGA	3	3	6	2	0.558942	1.02047	1.17955	0.362808	0.868459	1.07746	-0.623494
Bju-N33	CGGGCGUGAGCAGCACUCGGU	3	6	2	4	0.558942	2.04093	0.393183	0.725615	1.86846	-0.507499	0.376506
Bju-N34	CGCGGGUAAACGGCGGGAGUU	3	4	2	5	0.558942	1.36062	0.393183	0.907019	1.2835	-0.507499	0.698435
Bju-N35	CAGAGCCUACAGACACUAGCUA	2	5	0	5	0.372628	1.70078	0	0.907019	2.19039	-	1.2834
Bju-N36	UGGCCACGCGGAUAUGGACCC	1	3	0	0	0.186314	1.02047	0	0	2.45342	-	-
Bju-N37	CGUGUCGGCUGGGGGACGGAC	1	3	2	0	0.186314	1.02047	0.393183	0	2.45342	1.07746	-
