# Supplementary material for: A Genome-Wide Perspective of miRNAome in Response to High Temperature, Salinity and Drought Stresses in Brassica juncea (Czern) L
Source: PLoS One. 2014 Mar 26;9(3):e92456. doi: 10.1371/journal.pone.0092456 (PMC3966790; doi:10.1371/journal.pone.0092456)
Supplement: Table S7 — Precursor sequences of true novel miRNAs. (XLSX) [file pone.0092456.s011.xlsx]

## Sheet: Table S7
Table S7: Precursor sequences of candidate miRNAs.
Precursors in B. juncea
ID	Chromosome	Sequence	miRNA*	Hairpin Sequence	Start	End	Orientation	Total abundance	sRNA length	Hairpin Length	Hairpin Start	Hairpin End	Hairpin Structure	Minimum Free Energy(MFE)	Adjusted MFE	Hairpin G/C%	miRNA* Start Coord	miRNA* End Coord	P_Val
Bju-N6	NODE_4695438_length_202_cov_2.910891	UUUCAUCUUAGAGAAUGUUGUU	CAACAGUCUCAGGAUGGAAAA(1) AAGACAACAGUCUCAGGAUGG(1)	UUAAGACAACAGUCUCAGGAUGGAAAAUGCUUUUGACUUAUGUAACCGUGAUCAAAUCUCGCAGCCAAAACUAAGUAAAAAGUAUUUUUCAUCUUAGAGAAUGUUGUUUUGA	26	47	- [Negative strand]	153	22	112	21	132	(((((({{{{{={{{{{{{{{{{{{{{(((((((.(((((.((..(.((((.......)))).).....))))))).)))))))))>>>>>>>>>->>>>->>>>>>>))))	-42	-37.5	33.0357	105	125	0.009901
Bju-N23	NODE_1431001_length_654_cov_2.834862	AAAGCUUUUAACUUUGAAAACU	UUUCAAAGUUCAAAGUAUUUG(1)	AUUCCAAAAGCUUUUAACUUUGAAAACUAAAUAAUUUACCUUUUUUGUAAUAAAAAAAGUUAUUUAGUUUUCAAAGUUCAAAGUAUUUGGAAU	71	92	+ [Positive strand]	16	22	93	64	156	((((((<<-<<<<<-<<<<<<<<<<<<<((((((.....(((((((......))))))))))))))))}}}}}}}}}}=}}}}}=}}}}))))	-37.1	-39.8925	19.3548	132	153	0.009901
Bju-N5	NODE_748296_length_338_cov_2.337278	AUAAAUCCCAAGCAUCAUCCA	UGGAUGAUGUUUGGGAUUUAU(1) GAUGAUGUUUGGGAUUUAUC(2)	AGAUAAAUCCCAAGCAUCAUCCACCUUAUCAGCUUUGACAUGAAUAAAAGCGUAUAAAAUGGAUGAUGUUUGGGAUUUAUCU	36	56	+ [Positive strand]	613	21	82	33	114	((<<<<<<<<<<<<<<<<<<<<<..((((..(((((..........)))))..))))..))}}}}}}}}}}}}}}}}}}}})	-42.4	-51.7073	34.1463	94	114	0.009901
Bju-N2	NODE_4179460_length_166_cov_2.192771	UUUCCAAAUGUAGACAAAGCA	CUUUGUCUAUCGUUUGGAAAA(29) CUUUGUCUAUCGUUUGGAAA(4) CUUUGUCUAUCGUUUGGAAAAG(2346) UUUGUCUAUCGUUUGGAAAAG(41) UUCUUUGUCUAUCGUUUGGAAA(1) UUGUCUAUCGUUUGGAAAAG(6) UUCUUUGUCUAUCGUUUGGAA(1)	CUUUGUCUAUCGUUUGGAAAAGGUUGAUGACGCCAUCUACACUUUUCCAAAUGUAGACAAAGCA	63	83	- [Negative strand]	11812	21	62	64	125	{{{{{{{{{={{{{{{{{{{{{((.((((....)))).)).))>>>>>>>>>>>>>>>>>>>	-31.7	-51.129	38.7097	103	124	0.009901
Precursors in B. rapa
Bju-N1	gi|339955920|gb|AENI01002667.1|_Brassica_rapa_Chr3_558	UCGCUUGGUGCAGGUCGGGAC	UCCCGCCUUGCAUCAACUGAA(1) CCCGCCUUGCAUCAACUGAA(1) UCCCGCCUUGCAUCAACUGAAU(1) CCCGCCUUGCAUCAACUGAAU(55)	GGGCUCGGAUUCGCUUGGUGCAGGUCGGGACACAAAUCACUGGUGCUUUUGCCUUAUUGGUUUGUGAGCAGGGAUUGGCUCCCGCCUUGCAUCAACUGAAUCGGAGCCU	1037	1057	+ [Positive strand]	16812	21	109	1026	1134	((((((.(((<<<-<<<<<<<<<<-<<<<<-.(((.((.((..(((((..(((.....)))....))))))))))))..)}}}}=}}}}}}}}}}=}}}}}).))))))	-55.7	-51.1009	55.0459	1106	1127	0.009901
Bju-N1	gi|339958475|gb|AENI01000112.1|_Brassica_rapa_Chr1_112	UCGCUUGGUGCAGGUCGGGAC	GAUCCCGCCUUGCAUCAACUGA(1) UCCCGCCUUGCAUCAACUGAA(1) CCCGCCUUGCAUCAACUGAA(1) UCCCGCCUUGCAUCAACUGAAU(1) CCCGCCUUGCAUCAACUGAAU(55)	UCACCGCCGGGCUCGGAUUCGCUUGGUGCAGGUCGGGACUAAUUCGCUGACACAGCCACGUGGAUUUUCCUUAUUGGUUUGUGAGCAGGGAUUGGAUCCCGCCUUGCAUCAACUGAAUCGGAGCCUCGAUGGUGA	620	640	+ [Positive strand]	16812	21	135	601	735	((((((.(((((((.(((<<<-<<<<<<<<<<-<<<<<<((((((.(((.((((((((...((.....))....))).)))))..)))))))))).)}}}}=}}}}}}}}}}=}}}}}).))))).)).))))))	-74.6	-55.2593	55.5556	698	719	0.009901
Bju-N10	gi|339956427|gb|AENI01002160.1|_Brassica_rapa_Chr3_51	GGGUCGACAUGAGAACACAUG	AUGUGUUCUCAGGUCACCCCUG(6) UGUGUUCUCAGGUCACCCCUG(14)	CUCGACAGGGUCGACAUGAGAACACAUGGUAAUCAAAGACUGUAAUGACGCCACGUCAUUGUAACAUACAUCACUCUUUUCAUGUGUUCUCAGGUCACCCCUGCUGAG	2557	2577	+ [Positive strand]	71	21	108	2549	2656	((((.((<<<--<<<-<<<<<<<<<<<<(.....(((((.((((((((((...))))))))..........)).))))))))}}}}}}}}}}=}}}==}}}}}.))))	-44.5	-41.2037	46.2963	2631	2652	0.009901
Bju-N11	gi|339953613|gb|AENI01004974.1|_Brassica_rapa_Chr6_278	UCCACCCAUACCAUACAGACCC	GUCUGUAUGUGUGGGCUGAGU(1) UCUGUAUGUGUGGGCUGAGUA(2)	GGGAUUAAGUGUCUGUAUGUGUGGGCUGAGUAGGCACAAUCACAGCUUUUACUCAGAUCUGGUUGUGAAUGGACCUUCUCCACCCAUACCAUACAGACCCUUAAUCCU	20723	20744	+ [Positive strand]	74	22	108	20644	20751	(((((((((.({{{{{{{{{{{{{{=={{{={((..((.((((((((.............)))))))).))..))).)>>-->>>>>>->>>>>>>>>->))))))))	-54.92	-50.8519	46.2963	20655	20676	0.009901
Bju-N12	gi|339949452|gb|AENI01009135.1|_Brassica_rapa_Chr10_405	AGCUUUGCGGUUGGUAGCGGUU	CCGCUACCAUCCGCAAACGCA(1) CCCGCUACCAUCCGCAAACGCA(1) GCUACCAUCCGCAAACGCAGC(3)	CGACUGGUUUUCCCGCUACCAUCCGCAAACGCAGCCGACUGGUUUUCCCGCUACCAUCCGCAAACGCAGCUUUGCGGUUGGUAGCGGUUGUCAGCG	176369	176390	- [Negative strand]	58	22	61	176361	176421	((.((((..(..(({{{{{{{={{{{{{{===--->>>>>>>->>>>>>>>>--)))))))	-30.8	-50.4918	59.0164	176386	176406	0.009901
Bju-N13	gi|339956365|gb|AENI01002222.1|_Brassica_rapa_Chr3_113	AGUUUGCGGAUGCGGAUGGUU	AGCGGUUGCGGUUGCGGUUGC(13) AGCGGUUGCGGUUGCGGUUGCG(4) GCGGUUGCGGUUGCGGUUGCG(1) GCAGCGGUUGCGGUUGCGGUU(5) GGUUGCGGUUGCGGUUGCGG(3) CGCAGCGGUUGCGGUUGCGGU(1) GGUUGCGGUUGCGGUUGCGGA(1) CGCAGCGGUUGCGGUUGCGG(1)	GACUGGUUUAACCGCAGCGGUUGCGGUUGCGGUUGCGGAAGUUUGCGGAUGCGGAUGGUUGCGGUUUCUAGCGGUU	4040	4060	- [Negative strand]	46	21	76	4023	4098	(((((.(..(((((({{{={{{{{{={{{{{{=={{...->>>>>>>>->>>->>>->>>))))))...).)))))	-32.5	-42.7632	57.8947	4062	4082	0.019802
Bju-N13	gi|339958578|gb|AENI01000009.1|_Brassica_rapa_Chr1_9	AGUUUGCGGAUGCGGAUGGUU	AGCGGUUGCGGUUGCGGUUGC(13) AGCGGUUGCGGUUGCGGUUGCG(4) GCGGUUGCGGUUGCGGUUGCG(1) GCAGCGGUUGCGGUUGCGGUU(5) CGCAGCGGUUGCGGUUGCGGU(1) CGCAGCGGUUGCGGUUGCGG(1)	GUUGAACCGCAGCGGUUGCGGUUGCGGUUGCGAAAGUUUGCGGAUGCGGAUGGUUGCGGUUUCUAGC	80204	80224	- [Negative strand]	46	21	67	80191	80257	(((((((((({{{={{{{{{={{{{{{=={{...->>>>>>>>->>>->>>->>>)))))))..)))	-28.4	-42.3881	58.209	80226	80246	0.009901
Bju-N15	gi|339958191|gb|AENI01000396.1|_Brassica_rapa_Chr1_396	GAAGCGAUUUGUAGCGGUUUA	UGUCAACCGCUACCAACCGCA(4) GUCAACCGCUACCAACCGCA(2) UGUCAACCGCUACCAACCGCAA(3) GUCAACCGCUACCAACCGCAA(8) GUCAACCGCUACCAACCGCAAA(2)	GCAGUUUGAAGCGAUUUGUAGCGGUUUAUAUGAUUGUUUCAAAACGAUGUCAACCGCUACCAACCGCAAAAGCUGC	50706	50726	- [Negative strand]	41	21	76	50657	50732	(((((((---<<<-<<-<<<<<<<<<-<(...((((((....))))))}}=}}}}}}}}}=}}=}}}==)))))))	-29.1	-38.2895	43.4211	50663	50683	0.009901
Bju-N17	gi|339955947|gb|AENI01002640.1|_Brassica_rapa_Chr3_531	GUUCGGACGCGGCGUCAGACG	ACGCUGCCGCUGCCGCCGGU(2) GACGCUGCCGCUGCCGCCGGU(2) GCUGCCGCUGCCGCCGGUACC(3) GCUGCCGCUGCCGCCGGUACCU(1) CUGCCGCUGCCGCCGGUACCU(1) GUUGACGCUGCCGCUGCCGCCG(1)	GGACGCAGCGUUCGGACGCGGCGUCAGACGCAGCUUUCUGCGUCAACGAAACGAACAAGAGUUGACGCAGAAUGUUGACGCUGCCGCUGCCGCCGGUACCUGCGACAACC	40638	40658	+ [Positive strand]	44	21	110	40628	40737	((.(((((.<<<<<<--<<<<<<-<<<-<<((((.((((((((((((.............)))))))))))).)))).)}}}}=}}}}}}==}}}}=}}}))))....))	-58.02	-52.7455	61.8182	40707	40728	0.009901
Bju-N19	gi|339949463|gb|AENI01009124.1|_Brassica_rapa_Chr10_394	ACUGUUAACUGCGGGGCGGAGC	CGGUUUAACUGCAGUGCAGUU(1)	GGGACAAACGGUUUAACUGCAGUGCAGUUUUAGCAGUUAUAAAAACAUAUAAAUAUAUAAUAUAUGUAGGGAUUUUGUUACUGUUAACUGCGGGGCGGAGCGGUUCU	19373	19394	- [Negative strand]	12	22	107	19366	19472	(((((...=={{{==={{{{=={{{{{{=.(((((((.(((((((((((((.........))))))).....)))))).>>>>>>>>>>>>>-->>>>>>>.)))))	-29.9	-27.9439	37.3832	19443	19463	0.009901
Bju-N2	gi|339952028|gb|AENI01006559.1|_Brassica_rapa_Chr8_128	UUUCCAAAUGUAGACAAAGCA	CUUUGUCUAUCGUUUGGAAAA(29) CUUUGUCUAUCGUUUGGAAA(4) CUUUGUCUAUCGUUUGGAAAAG(2346) UUUGUCUAUCGUUUGGAAAAG(41) UUCUUUGUCUAUCGUUUGGAAA(1) UUGUCUAUCGUUUGGAAAAG(6) UUUGUCUAUCGUUUGGAAAAGA(11) UUCUUUGUCUAUCGUUUGGAA(1) UUGUCUAUCGUUUGGAAAAGA(1)	CUUUGUCUAUCGUUUGGAAAAGAUUGAUGACGCUAUCUACACUUUUCCAAAUGUAGACAAAGCA	2054	2074	+ [Positive strand]	11812	21	62	2010	2071	{{{{{{{{{={{{{{{{{{{{{...((((....))))....))>>>>>>>>>>>>>>>>>>>	-27	-43.5484	35.4839	2010	2032	0.009901
Bju-N22	gi|339956590|gb|AENI01001997.1|_Brassica_rapa_Chr2_858	AUGUAUGGCUGGGAAGGGCGC	GCCCCUCCCGGCCAUACAUAU(1)	ACCCUAACCCCUCUCAUAUGCGCCCCUCCCGGCCAUACAUAUAGGUUAUUGAUGGUCAAUUGAUGACAACUCAUCCUGUUGAAGUGUUGUUAAAGGGUGAGGUCUUGGAUUCGAGUAACGCCAAGCGCAUCAAUAACCUAUAUGUAUGGCUGGGAAGGGCGCACAUGAGAGAGGUUAGGGU	109125	109145	- [Negative strand]	20	21	181	109105	109285	(((((((((.(((((((.((({{{{={{{{{{{{{{{{{{{{((((((((((((((...((((..(((..(((......)))..)))..))))..((((....((((....))))...))))..)).))))))))))))))>>>>>>>>>>>>>>->>>>>>).))))))).)))))))))	-111.4	-61.547	48.0663	109243	109263	0.009901
Bju-N26	gi|339953780|gb|AENI01004807.1|_Brassica_rapa_Chr6_111	GUUUGCGGAUGCGGAUGGUU	AAGGGUCUGACUGGUUCAAA(2) AAGGGUCUGACUGGUUCAAAC(5) AGGGUCUGACUGGUUCAAAC(7) AGGGUCUGACUGGUUCAAACG(2) GGGUCUGACUGGUUCAAACGC(1) GGUCUGACUGGUUCAAACGCA(6)	AGAAACCACUAAGGGUCUGACUGGUUCAAACGCAGCGGUUGCGGUUGCGGCUGCGGGCGUUUGCGGAUGCGGAUGGUUGCGGUUUCU	21274	21293	- [Negative strand]	19	20	87	21264	21350	(((((((.(.({=={{{{{={{{==={{{{{((.((((((((....))))))))..))>>>>>>>>--->>>>>-->>).)))))))	-37.2	-42.7586	58.6207	21319	21338	0.019802
Bju-N28	gi|339955620|gb|AENI01002967.1|_Brassica_rapa_Chr3_858	AUACGGGGGGACACGGGCUUGG	GGUCGCACCGCUUGUCCCCCC(1)	UUAUACGGGGGGACACGGGCUUGGACCCGGAACGGUCGCACCGCUUGUCCCCCCUUGUGA	52113	52134	+ [Positive strand]	15	22	60	52110	52169	((<<<-<<<<<<<<<<<<<<---<(((......}}}}}}=}}}==}}}}}}}}}.)))))	-31.8	-53	65	52143	52164	0.019802
Bju-N29	gi|339956257|gb|AENI01002330.1|_Brassica_rapa_Chr3_221	UGCGGACGGUUGCGGGAGGAUA	UCGCUUCAAACCGCUCCGAAC(1) GCUUCAAACCGCUCCGAACCU(1)	AUCGCUUCAAACCGCUCCGAACCUCUUAAAUUCAAAAGCUGGUUUCAGCUAGCGUUUGCGGUUGCGGACGGUUGCGGGAGGAUA	26305	26326	+ [Positive strand]	21	22	83	26242	26324	({{={{{{={{{{{={{{{{{{(.........((((.((((((....)))))).)))).)))>->>>>>>>>>--->>>>>>>	-29.9	-36.0241	51.8072	26243	26264	0.019802
Bju-N3	gi|339955620|gb|AENI01002967.1|_Brassica_rapa_Chr3_858	UUGUGUUGUGAUGAUAAUCC	AUUAUCAUCACAACACUAGA(21) AUUAUCAUCACAACACUAGAU(1)	AAGUUUUUUUUGAUCUUGUGUUGUGAUGAUAAUCCGACUUCCAUGACUAAAUCAACAAGUUUCAACAUGGUCACCAUGACUCAUGCUUGAUGAUGUCGAUUAGAAAUUUGUUGGUUUGGAUCUUGGAAGUCGUAUUAUCAUCACAACACUAGAUCUAAAAAAAUUU	58234	58253	+ [Positive strand]	1363	20	166	58218	58383	((((((((((.((((<-<<<<<<<<<<<<<<<<-<((((((((.(((((((((((((((((((..(((((((.....))).)))).(((((...)))))...))))))))))))))))).)).))))))))).}}}}}}}}}}}}}}}}=}}})).))))))))))	-82.6	-49.759	33.1325	58351	58371	0.009901
Bju-N4	gi|339954838|gb|AENI01003749.1|_Brassica_rapa_Chr5_24	ACAGGGAACAAGCAGAGCAUG	AUGCACUGCCUCUUCCCUGGC(57) UGCACUGCCUCUUCCCUGGC(4)	GAGAGAGACAGGGAACAAGCAGAGCAUGGAUUGAGUUUUUACCAAAACAUCAAAUGACUAUGUUUGGUCUCUUCCCAUGCACUGCCUCUUCCCUGGCUCCCUC	12167	12187	- [Negative strand]	526	21	103	12091	12193	(((.(((-<<<<<<<---<<<<-<<<<<(.(((((((((....))))).))))..(((((....))))).....))}}}}=}}}}===}}}}}}}=})).)))	-43.5	-42.233	47.5728	12096	12116	0.009901
Bju-N6	gi|339958315|gb|AENI01000272.1|_Brassica_rapa_Chr1_272	UUUCAUCUUAGAGAAUGUUGUU	CAACAGUCUCAGGAUGGAAAA(1) AAGACAACAGUCUCAGGAUGG(1)	UUAAGACAACAGUCUCAGGAUGGAAAAUGCUUUUGACUUAUGUAACCGUGAUCAAAUCUCGCAGCCAAAACUAAGUAAAAAGUAUUUUUCAUCUUAGAGAAUGUUGUUUUGA	10684	10705	- [Negative strand]	153	22	112	10679	10790	(((((({{{{{={{{{{{{{{{{{{{{(((((((.(((((.((..(.((((.......)))).).....))))))).)))))))))>>>>>>>>>->>>>->>>>>>>))))	-42	-37.5	33.0357	10763	10783	0.009901
Bju-N7	gi|339953957|gb|AENI01004630.1|_Brassica_rapa_Chr5_905	UGGGGUUGUGAUUUCAGGCUU	GCCUGAAAUAAACAAUCCCAAC(1)	AGAUACACAAGCCAAGCCUGAAAUAAACAAUCCCAACAGAUUACAAAUCAUUUGGCCUUGAAUUUCAUUUGUAAUAUGUUGGGGUUGUGAUUUCAGGCUUGGCUUGUGUAUCU	10996	11016	+ [Positive strand]	151	21	113	10916	11028	((((((((((((((({{{{{{{{{=={{{{{{{{{{{(.(((((((((.((((......))))...))))))))).)))>>>>>>>>>->>>>>>>>>>>)))))))))))))	-68.1	-60.2655	37.1681	10931	10953	0.009901
Precursors in other Brassica species
Bju-N14	gi|27030006|gb|BZ507761.1|BZ507761 BONMX09TR BO_1.6_2_KB_tot Brassica oleracea genomic clone BONMX09	GCCGACUAGGGAUCAGCGGAU	AGGACUCCGCUGGCACCUAU(2)	GAUGCCGACUAGGGAUCAGCGGAUGUUGCUUUUAGGACUCCGCUGGCACCUAUGAGAAUC	725	745	+ [Positive strand]	63	21	60	721	780	(((--<---<<<<--<<<<<<<<-(((......==}}}}}}}}}}}==}}}}=..).)))	-21	-35	53.3333	754	774	0.019802
Bju-N14	gi|27040911|gb|BZ513723.1|BZ513723 BOMSD54TF BO_2_3_KB Brassica oleracea genomic clone BOMSD54	GCCGACUAGGGAUCAGCGGAU	AGGACUCCGCUGGCACCUUACG(1)	GAUGCCGACUAGGGAUCAGCGGAUGUUGCUUUUAGGACUCCGCUGGCACCUUACGAGAAAUC	667	687	- [Negative strand]	63	21	62	628	689	(((--<<---<<<--<<<<<<<<-(((......==}}}}}}}}}}}==}}}==}}....)))	-20.7	-33.3871	53.2258	634	655	0.039604
Bju-N16	gi|23450657|gb|BH969431.1|BH969431 odj12a12.g1 B.oleracea002 Brassica oleracea genomic	UUGGAAAGAUUAUGAGAGCAUG	CGUGCUUUCGGAGUCUUGCAA(1)	ACGUGCUUUCGGAGUCUUGCAAGCUCGAUUUGCAAUUGUUAAAAAUCUGACACUUUGUUGGGAUAAAGUCAAAAUUGGAAAGAUUAUGAGAGCAUGU	83	104	- [Negative strand]	47	22	97	81	177	({{{{{{{{{{={{{{{{={{{....(((((((((.(((((......)))))..)))).......)))))....>>>-->>>>>>->>>>>>>>>>)	-27.11	-27.9485	37.1134	155	175	0.019802
Bju-N16	gi|23582553|gb|BZ022819.1|BZ022819 oed21a07.g1 B.oleracea002 Brassica oleracea genomic	UUGGAAAGAUUAUGAGAGCAUG	CGUGCUUUCGGAGUCUUGCAA(1)	ACGUGCUUUCGGAGUCUUGCAAGCUCGAUUUGCAAUUGUUAAAAAUCUGACACUUUGUUGGGAUAAAGUCAAAAUUGGAAAGAUUAUGAGAGCAUGU	163	184	- [Negative strand]	47	22	97	161	257	({{{{{{{{{{={{{{{{={{{....(((((((((.(((((......)))))..)))).......)))))....>>>-->>>>>>->>>>>>>>>>)	-27.11	-27.9485	37.1134	235	255	0.029703
Bju-N18	gi|73682073|gb|DU107965.1|DU107965 JBnY026O23R Brassica naps BAC library JBnY Brassica naps genomic clone JBnY026O23	AAGGGAACGGGCUUGGCAGAC	AGCUUGACUCUAGUCCGACUU(8) GAGCUUGACUCUAGUCCGACUU(5) GCUUGACUCUAGUCCGACUU(1) AGCUUGACUCUAGUCCGACU(3) AGCUUGACUCUAGUCCGACUUU(2) GAGCUUGACUCUAGUCCGACU(5) UGAGCUUGACUCUAGUCCGACU(2) GAGCUUGACUCUAGUCCGAC(1) GCUUGACUCUAGUCCGACUUUG(3) UGAGCUUGACUCUAGUCCGAC(6) UUGAGCUUGACUCUAGUCCGAC(2) UGAGCUUGACUCUAGUCCGA(1) UUGAGCUUGACUCUAGUCCG(1) UUGACUCUAGUCCGACUUUGUG(1)	CAAGGGAACGGGCUUGGCAGACUCAGCGGGGAAAGAAGACCCUGUUGAGCUUGACUCUAGUCCGACUUUG	745	765	+ [Positive strand]	20	21	70	743	812	(<<<<---<<<<<<-<<<<--<(((((((((........))))))))}}==}}=}}==}}}}}}=}}}))	-31.8	-45.4286	55.7143	790	811	0.009901
Bju-N2	gi|150164377|gb|EE559095.1|EE559095 BNZB_UP_039_H01_07MAY2004_001 Brassica naps BNZB Brassica naps cDNA 5'	UUUCCAAAUGUAGACAAAGCA	CUUUGUCUAUCGUUUGGAAAA(29) CUUUGUCUAUCGUUUGGAAA(4) CUUUGUCUAUCGUUUGGAAAAG(2346) UUUGUCUAUCGUUUGGAAAAG(41) UUCUUUGUCUAUCGUUUGGAAA(1) UUGUCUAUCGUUUGGAAAAG(6) UUUGUCUAUCGUUUGGAAAAGA(11) UUCUUUGUCUAUCGUUUGGAA(1) UUGUCUAUCGUUUGGAAAAGA(1)	CUUUGUCUAUCGUUUGGAAAAGAUUGAUGACGCUAUCUACACUUUUCCAAAUGUAGACAAAGCA	421	441	- [Negative strand]	11812	21	62	422	483	{{{{{{{{{={{{{{{{{{{{{...((((....))))....))>>>>>>>>>>>>>>>>>>>	-27	-43.5484	35.4839	461	482	0.009901
Bju-N2	gi|150166574|gb|EE564220.1|EE564220 BNZB_UP_105_F03_15JUN2004_021 Brassica naps BNZB Brassica naps cDNA 5'	UUUCCAAAUGUAGACAAAGCA	CUUUGUCUAUCGUUUGGAAAA(29) CUUUGUCUAUCGUUUGGAAA(4) CUUUGUCUAUCGUUUGGAAAAG(2346) UUUGUCUAUCGUUUGGAAAAG(41) UUCUUUGUCUAUCGUUUGGAAA(1) UUGUCUAUCGUUUGGAAAAG(6) UUUGUCUAUCGUUUGGAAAAGA(11) UUCUUUGUCUAUCGUUUGGAA(1) UUGUCUAUCGUUUGGAAAAGA(1)	GUUCUUCUUUGUCUAUCGUUUGGAAAAGAUUGAUGACGCUAUCUACACUUUUCCAAAUGUAGACAAAGCAAAAC	317	337	- [Negative strand]	11812	21	74	312	385	(((...{{{{{{{{{={{{{{{{{{{{{...((((....))))....))>>>>>>>>>>>>>>>>>>>--.)))	-27.5	-37.1622	35.1351	357	378	0.009901
Bju-N2	gi|150883098|gb|ES913560.1|ES913560 BNARO2GH_T3_026_C07_15DEC2006_059 Brassica naps BNARO2GH Brassica naps cDNA 5'	UUUCCAAAUGUAGACAAAGCA	CUUUGUCUAUCGUUUGGAAAA(29) CUUUGUCUAUCGUUUGGAAA(4) CUUUGUCUAUCGUUUGGAAAAG(2346) UUUGUCUAUCGUUUGGAAAAG(41) UUCUUUGUCUAUCGUUUGGAAA(1) UUGUCUAUCGUUUGGAAAAG(6) UUUGUCUAUCGUUUGGAAAAGA(11) UUCUUUGUCUAUCGUUUGGAA(1) UUGUCUAUCGUUUGGAAAAGA(1)	CUUUGUCUAUCGUUUGGAAAAGAUUGAUGACGCUAUCUACACUUUUCCAAAUGUAGACAAAGCA	97	117	+ [Positive strand]	11812	21	62	53	114	{{{{{{{{{={{{{{{{{{{{{...((((....))))....))>>>>>>>>>>>>>>>>>>>	-27	-43.5484	35.4839	53	75	0.009901
Bju-N2	gi|151249940|gb|EV160364.1|EV160364 0084226 Brassica naps Bd library Brassica naps cDNA	UUUCCAAAUGUAGACAAAGCA	CUUUGUCUAUCGUUUGGAAAA(29) CUUUGUCUAUCGUUUGGAAA(4) CUUUGUCUAUCGUUUGGAAAAG(2346) UUUGUCUAUCGUUUGGAAAAG(41) UUCUUUGUCUAUCGUUUGGAAA(1) UUGUCUAUCGUUUGGAAAAG(6) UUUGUCUAUCGUUUGGAAAAGA(11) UUCUUUGUCUAUCGUUUGGAA(1) UUGUCUAUCGUUUGGAAAAGA(1)	CUUUGUCUAUCGUUUGGAAAAGAUUGAUGACGCUAUCUACACUUUUCCAAAUGUAGACAAAGCA	444	464	- [Negative strand]	11812	21	62	445	506	{{{{{{{{{={{{{{{{{{{{{...((((....))))....))>>>>>>>>>>>>>>>>>>>	-27	-43.5484	35.4839	484	505	0.009901
Bju-N20	gi|150921445|gb|ES951903.1|ES951903 9RDBNGA_UP_089_F10_05APR2005_070 Brassica naps 9RDBNGA Brassica naps cDNA 5'	GUCGGCCGGGGACGGACUGGGA	UCCCAGUUCCGAACCCGUCGAC(33) CCCAGUUCCGAACCCGUCGAC(33) UCCCAGUUCCGAACCCGUCGA(26) CCCAGUUCCGAACCCGUCGACU(72) CCAGUUCCGAACCCGUCGACU(18) CCAGUUCCGAACCCGUCGACUG(127) CAGUUCCGAACCCGUCGACUG(348) CAGUUCCGAACCCGUCGACUGU(70) AGUUCCGAACCCGUCGACUGU(168)	UCCCAGUUCCGAACCCGUCGACUGUUGGCGGGCUGCUUGAGCUGCUAACGUGGCGAGAGCGGACCGCCUCGUGUCGGCCGGGGACGGACUGGGA	100	121	+ [Positive strand]	46	22	94	27	120	((({{{{={{{=={{{{{{{{{==..(((((.((((((..((..(....)..))..)))))).)))))....>>>>>->>>>-->>>>>>>>>>	-60.9	-64.7872	68.0851	30	51	0.009901
Bju-N20	gi|151054095|gb|EV067875.1|EV067875 BNSCS4CT_UP_123_C08_20MAY2007_060 Brassica naps BNSCS4CT Brassica naps cDNA 5'	GUCGGCCGGGGACGGACUGGGA	UCCCAGUUCCGAACCCGUCGAC(33) CCCAGUUCCGAACCCGUCGAC(33) UCCCAGUUCCGAACCCGUCGA(26) CCCAGUUCCGAACCCGUCGACU(72) CCAGUUCCGAACCCGUCGACU(18) CCAGUUCCGAACCCGUCGACUG(127) CAGUUCCGAACCCGUCGACUG(348) CAGUUCCGAACCCGUCGACUGU(70) AGUUCCGAACCCGUCGACUGU(168)	UCCCAGUUCCGAACCCGUCGACUGUUGGCGGGCUGCUUGAGCUGCUAACGUGGCGAGAGCGGACCGCCUCGUGUCGGCCGGGGACGGACUGGGA	100	121	+ [Positive strand]	46	22	94	27	120	((({{{{={{{=={{{{{{{{{==..(((((.((((((..((..(....)..))..)))))).)))))....>>>>>->>>>-->>>>>>>>>>	-60.9	-64.7872	68.0851	30	51	0.009901
Bju-N20	gi|18823052|gb|BH721262.1|BH721262 BOMFB94TF BO_2_3_KB Brassica oleracea genomic clone BOMFB94	GUCGGCCGGGGACGGACUGGGA	UCCCAGUUCCGAACCCGUCGAC(33) CCCAGUUCCGAACCCGUCGAC(33) UCCCAGUUCCGAACCCGUCGA(26) CCCAGUUCCGAACCCGUCGACU(72) CCAGUUCCGAACCCGUCGACU(18) CCAGUUCCGAACCCGUCGACUG(127) CAGUUCCGAACCCGUCGACUG(348) CAGUUCCGAACCCGUCGACUGU(70) AGUUCCGAACCCGUCGACUGU(168)	UCCCAGUUCCGAACCCGUCGACUGUUGGCGGGCUGCUUGAGCCGCUAACGUGGCGAGAGCGGACCGCCUCGUGUCGGCCGGGGACGGACUGGGA	210	231	+ [Positive strand]	46	22	94	137	230	((({{{{={{{=={{{{{{{{{==..(((((.((((((..(((((....)))))..)))))).)))))....>>>>>->>>>-->>>>>>>>>>	-63.7	-67.766	69.1489	140	161	0.009901
Bju-N21	gi|18832172|gb|BH726777.1|BH726777 BOMKI69TF BO_2_3_KB Brassica oleracea genomic clone BOMKI69	AAGGGAACGGGCUUGGCAGAU	AGCUUGACUCUAGUCCGACUUU(2) GCUUGACUCUAGUCCGACUU(1) AGCUUGACUCUAGUCCGACUU(8) GAGCUUGACUCUAGUCCGACUU(5) AGCUUGACUCUAGUCCGACU(3)	CAAGGGAACGGGCUUGGCAGAUCAGCGGGGAAAGAAGACCCUGUUGAGCUUGACUCUAGUCCGACUUUUG	18	38	+ [Positive strand]	27	21	70	16	85	(<<<<<--<<<<<<-<<<<<-<((((((((........))))))))}==}}}=}}==}}}}}}=}}})))	-28.3	-40.4286	54.2857	62	83	0.009901
Bju-N21	gi|73677594|gb|DU103486.1|DU103486 JBnY033B01F Brassica naps BAC library JBnY Brassica naps genomic clone JBnY033B01	AAGGGAACGGGCUUGGCAGAU	AGCUUGACUCUAGUCCGACUU(8) GAGCUUGACUCUAGUCCGACUU(5) GCUUGACUCUAGUCCGACUU(1) AGCUUGACUCUAGUCCGACU(3) AGCUUGACUCUAGUCCGACUUU(2) GAGCUUGACUCUAGUCCGACU(5) UGAGCUUGACUCUAGUCCGACU(2) GAGCUUGACUCUAGUCCGAC(1) GCUUGACUCUAGUCCGACUUUG(3) UGAGCUUGACUCUAGUCCGAC(6) UUGAGCUUGACUCUAGUCCGAC(2) UGAGCUUGACUCUAGUCCGA(1) UUGAGCUUGACUCUAGUCCG(1) UUGACUCUAGUCCGACUUUGUG(1)	UCCCACUGUCCCUGUCUACUAUCCAGCGAAACCACAGCCAAGGGAACGGGCUUGGCAGAUCAGCGGGGAAAGAAGACCCUGUUGAGCUUGACUCUAGUCCGACUUUGUGAAAUGACUUGAGAGGUGUAGAAUAAGUGGGA	832	852	+ [Positive strand]	27	21	140	792	931	(((((((.......(((((...((..(((...((...((<<<<---<<<<<<-<<<<<-<((((((((........))))))))}==}}}=}}==}}}}}}=}}})).)...))..)))...)).)))))...)))))))	-48.3	-34.5	51.4286	876	897	0.029703
Bju-N24	gi|211911492|gb|FP059271.1|FP059271 FP059271 Brassica naps BAC library (JBnB) Brassica naps genomic clone JBnB086D05	AGCGGAUUGGUUAGUGCGGUG	ACUGCGGGACAAGUGCGGUUC(1)	GGACAAGCGGAUUGGUUAGUGCGGUGCGGUUUAAGAGCGGUUUGUGUUAGAAAAACGUGUACUGCGGGACAAGUGCGGUUCGUCC	405	425	+ [Positive strand]	23	21	85	399	483	(((((<-<<-<<<-<<<--<<<<<<<((((((...((((.....))))....)))).)))}}}}}}=}}}=}}}=}}=}}=))))	-27.5	-32.3529	52.9412	459	480	0.039604
Bju-N25	gi|206715167|gb|CU939227.1|CU939227 CU939227 Brassica naps BAC library (JBnB) Brassica naps genomic clone JBnB074P13	CCGGGGGACGGACUGGGAAA	UCCCAGUUCCGAACCCGUCGA(26) CCCAGUUCCGAACCCGUCGA(9) CCCAGUUCCGAACCCGUCGAC(33) CCAGUUCCGAACCCGUCGAC(6) CCAGUUCCGAACCCGUCGACU(18) CAGUUCCGAACCCGUCGACU(16) CAGUUCCGAACCCGUCGACUG(348)	UCCCAGUUCCGAACCCGUCGACUGUUGGCGGGCUGCUUGAGCUGCUAACGUGGCGAGAGCGGACCGCCUCGUGUCGGCCGGGGGACGGACUGGGAAA	602	621	+ [Positive strand]	12	20	95	524	618	((({{{{={{{=={{{{{{{{{==..(((((.((((((..((..(....)..))..)))))).)))))....)))))>-->>>-->>>>>>>>>>	-59.5	-62.6316	68.421	527	548	0.009901
Bju-N25	gi|26700023|gb|BZ441771.1|BZ441771 BONJW18TR BO_1.6_2_KB_tot Brassica oleracea genomic clone BONJW18	CCGGGGGACGGACUGGGAAA	UCCCAGUUCCGAACCCGUCGA(26) CCCAGUUCCGAACCCGUCGA(9) CCCAGUUCCGAACCCGUCGAC(33) CCAGUUCCGAACCCGUCGAC(6) CCAGUUCCGAACCCGUCGACU(18) CAGUUCCGAACCCGUCGACU(16) CAGUUCCGAACCCGUCGACUG(348)	UCCCAGUUCCGAACCCGUCGACUGUUGGCGGGCUGCUUGAGCCGCUAACGUGGCGAGAGCGGACCGCCUCGUGUCGGCCGGGGGACGGACUGGGAAA	694	713	+ [Positive strand]	12	20	95	616	710	((({{{{={{{=={{{{{{{{{==..(((((.((((((..(((((....)))))..)))))).)))))....)))))>-->>>-->>>>>>>>>>	-62.3	-65.579	69.4737	619	640	0.009901
Bju-N25	gi|27014765|gb|BZ499553.1|BZ499553 BONIC92TR BO_1.6_2_KB_tot Brassica oleracea genomic clone BONIC92	CCGGGGGACGGACUGGGAAA	UCCCAGUUCCGAACCCGUCGA(26) CCCAGUUCCGAACCCGUCGA(9) CCCAGUUCCGAACCCGUCGAC(33) CCAGUUCCGAACCCGUCGAC(6) CCAGUUCCGAACCCGUCGACU(18) CAGUUCCGAACCCGUCGACU(16) CAGUUCCGAACCCGUCGACUG(348)	UCCCAGUUCCGAACCCGUCGACUGUUGGCGGGCUGCUUGAGCCCGCUACGUGGCGAGAGCGGACCGCCUCGUGUCGGCCGGGGGACGGACUGGGAAA	711	730	+ [Positive strand]	12	20	95	633	727	((({{{{={{{=={{{{{{{{{==..(((((.((((((..(((((...)).)))..)))))).)))))....)))))>-->>>-->>>>>>>>>>	-58.8	-61.8947	70.5263	636	657	0.009901
Bju-N25	gi|27026923|gb|BZ506136.1|BZ506136 BONGW30TF BO_1.6_2_KB_tot Brassica oleracea genomic clone BONGW30	CCGGGGGACGGACUGGGAAA	UCCCAGUUCCGAACCCGUCGA(26) CCCAGUUCCGAACCCGUCGA(9) CCCAGUUCCGAACCCGUCGAC(33) CCAGUUCCGAACCCGUCGAC(6) CCAGUUCCGAACCCGUCGACU(18) CAGUUCCGAACCCGUCGACU(16) CAGUUCCGAACCCGUCGACUG(348)	UCCCAGUUCCGAACCCGUCGACUGUUGGCGGGCUGCUUGAGCCGCUAACGUGGCGAGAGCGGACCGCCUCGUGUCGGCCGGGGGACGGACUGGGAAA	706	725	+ [Positive strand]	12	20	95	628	722	((({{{{={{{=={{{{{{{{{==..(((((.((((((..(((((....)))))..)))))).)))))....)))))>-->>>-->>>>>>>>>>	-62.3	-65.579	69.4737	631	652	0.009901
Bju-N27	gi|151189313|gb|EV102786.1|EV102786 0095109 Brassica naps Leaf library Brassica naps cDNA	CGUGUCGGCCGGGGGACGGCC	GUUCCGAACCCGUCGACUGUU(19) AGUUCCGAACCCGUCGACUGUU(18) UUCCGAACCCGUCGACUGUU(16) GUUCCGAACCCGUCGACUGU(42) GUUCCGAACCCGUCGACUGUUG(4) AGUUCCGAACCCGUCGACUGU(168) UUCCGAACCCGUCGACUGUUG(5) CAGUUCCGAACCCGUCGACUGU(70) UCCGAACCCGUCGACUGUUG(8) AGUUCCGAACCCGUCGACUG(56) UUCCGAACCCGUCGACUGUUGG(4) CAGUUCCGAACCCGUCGACUG(348) UCCGAACCCGUCGACUGUUGG(30) CCAGUUCCGAACCCGUCGACUG(127) CCGAACCCGUCGACUGUUGG(23) CAGUUCCGAA…	UCCCAGUUCCGAACCCGUCGACUGUUGGCGGGCUGCUUGAGCUGCUAACGUGGCGAGAGCGGACCGCCUCGUGUCGGCCGGGGGACGGCCUGGGA	457	477	+ [Positive strand]	30	21	95	387	481	((((((..{{{=={{{{{{{{{===={{{((.((((((..((..(....)..))..)))))).))))).--->>>>>>-->>>-->>>->)))))	-56.5	-59.4737	69.4737	395	416	0.009901
Bju-N3	gi|23417995|gb|BH937929.1|BH937929 odg55c03.g1 B.oleracea002 Brassica oleracea genomic	UUGUGUUGUGAUGAUAAUCC	UCGGAUUAUCAUCACAACACU(55) UCGGAUUAUCAUCACAACAC(5) GGAUUAUCAUCACAACACUA(2) CUCGGAUUAUCAUCACAACAC(1) GGAUUAUCAUCACAACACUAG(5) GAUUAUCAUCACAACACUAGA(1) AUUAUCAUCACAACACUAGA(21) AUUAUCAUCACAACACUAGAU(1)	AGUUUUUUUGAUCUUGUGUUGUGAUGAUAAUCCGACUCCAUUACUAAAAUCAACUAGUUUCACCAUGACUCAUGCUUUGAUGAUGUUGAUUAGAAACUUGUUGGUUUGGGUCUUGGAACUCGGAUUAUCAUCACAACACUAGAUCUAAAAAAUU	345	364	- [Negative strand]	1363	20	154	223	376	((((((((.((((<-<<<<<<<<<<<<<<<<<<((.((((..(((.((((((((.((((((.....(((((((......)))).))).....)))))).)))))))).)))..))))..}}}}}}}}}}}}}}}}}}}}=))))).))))))))	-70.6	-45.8442	33.7662	236	256	0.009901
Bju-N30	gi|151049448|gb|EV063224.1|EV063224 BNSCS4CT_UP_064_E12_18MAY2007_088 Brassica naps BNSCS4CT Brassica naps cDNA 5'	AAGGGAACGGGCUUGGCCGAA	AGCUUGACUCUAGUCCGACUU(8) GAGCUUGACUCUAGUCCGACUU(5) GCUUGACUCUAGUCCGACUU(1) AGCUUGACUCUAGUCCGACU(3) AGCUUGACUCUAGUCCGACUUU(2) GAGCUUGACUCUAGUCCGACU(5) UGAGCUUGACUCUAGUCCGACU(2) GAGCUUGACUCUAGUCCGAC(1) GCUUGACUCUAGUCCGACUUUG(3) UGAGCUUGACUCUAGUCCGAC(6) UUGAGCUUGACUCUAGUCCGAC(2) UGAGCUUGACUCUAGUCCGA(1) UUGAGCUUGACUCUAGUCCG(1) UUGACUCUAGUCCGACUUUGUG(1)	CAAGGGAACGGGCUUGGCCGAAUCAGCGGGGAAAGAAGACCCUGUUGAGCUUGACUCUAGUCCGACUUUG	332	352	+ [Positive strand]	11	21	70	330	399	(<<<<---<<<<<<-<<-<<<-(((((((((........))))))))}==}}}=}}==}}}}}}=}}}))	-28.6	-40.8571	55.7143	377	398	0.019802
Bju-N31	gi|18824606|gb|BH721967.1|BH721967 BOMJN70TF BO_2_3_KB Brassica oleracea genomic clone BOMJN70	GUCCGGAGACGUCGGCGGGAU	AUCCGGUUAAAAUUCCGGAAC(2) GAUCCGGUUAAAAUUCCGGAAC(4) AUCCGGUUAAAAUUCCGGAA(11) AUCCGGUUAAAAUUCCGGAACC(4) GAUCCGGUUAAAAUUCCGGAA(78) GGAUCCGGUUAAAAUUCCGGAA(1) GAUCCGGUUAAAAUUCCGGA(3) CGGUUAAAAUUCCGGAACCGG(6) GGGAUCCGGUUAAAAUUCCG(1) CGGUUAAAAUUCCGGAACCGGG(13)	GGGAUCCGGUUAAAAUUCCGGAACCGGGACGUGGCGGUUGACGGCAACGUUAGGGAGUCCGGAGACGUCGGCGGGAUUCC	867	887	+ [Positive strand]	16	21	80	810	889	(({{{{{={{=={=={{{{{{{=((..(((((.((.(....).)).))))).))..->>>>>>>--->-->>->>>>)))	-38.1	-47.625	62.5	812	833	0.009901
Bju-N31	gi|206982239|gb|CU966268.1|CU966268 CU966268 Brassica naps BAC library (JBnB) Brassica naps genomic clone JBnB167L05	GUCCGGAGACGUCGGCGGGAU	GAUCCGGUUAAAAUUCUGGAA(2) CGGUUAAAAUUCUGGAACCGG(3) CGGUUAAAAUUCUGGAACCGGG(4)	GGGAUCCGGUUAAAAUUCUGGAACCGGGACGUGGCGGUUGACGGCUACGUUAGGAAGUCCGGAGACGUCGGCGGGAUUCC	590	610	- [Negative strand]	16	21	80	586	665	(((((({={{=={=={{{{{{{={{=={(((((((.(....).)))))))).))..->>>>>>>--->-->>->>>>)))	-39	-48.75	60	637	658	0.019802
Bju-N32	gi|150982847|gb|ES997226.1|ES997226 BNAEN3GH_UP_062_H08_01SEP2006_050 Brassica naps BNAEN3GH Brassica naps cDNA 5'	GUCGGCCGGGGGACGGACUGGA	CCAGUUCCGAACCCGUCGACUG(127) CAGUUCCGAACCCGUCGACUG(348) CCAGUUCCGAACCCGUCGACU(18) CCCAGUUCCGAACCCGUCGACU(72) CAGUUCCGAACCCGUCGACUGU(70) AGUUCCGAACCCGUCGACUGU(168) CCCAGUUCCGAACCCGUCGAC(33) UCCCAGUUCCGAACCCGUCGAC(33) AGUUCCGAACCCGUCGACUGUU(18) GUUCCGAACCCGUCGACUGUU(19) UCCCAGUUCCGAACCCGUCGA(26) GUUCCGAACCCGUCGACUGUUG(4) UUCCGAACCCGUCGACUGUUG(5)	CCAGUUCCGAACCCGUCGACUGUUGGCGGGCUGCUUGAGCUGCUAACGUGGCGAGAGCGGACCGCCUCGUGUCGGCCGGGGGACGGACUGGA	100	121	+ [Positive strand]	14	22	91	29	119	({{{{={{{=={{{{{{{{{==..(((((.((((((..((..(....)..))..)))))).)))))....>>>>>>-->>>-->>>>>>>>	-54.3	-59.6703	69.2308	30	51	0.009901
Bju-N32	gi|209408760|gb|FP014298.1|FP014298 FP014298 Brassica naps BAC library (JBnB) Brassica naps genomic clone JBnB106O24	GUCGGCCGGGGGACGGACUGGA	CCAGUUCCGAACCCGUCGACUG(127) CAGUUCCGAACCCGUCGACUG(348) CCAGUUCCGAACCCGUCGACU(18) CCCAGUUCCGAACCCGUCGACU(72) CAGUUCCGAACCCGUCGACUGU(70) AGUUCCGAACCCGUCGACUGU(168) CCCAGUUCCGAACCCGUCGAC(33) UCCCAGUUCCGAACCCGUCGAC(33) AGUUCCGAACCCGUCGACUGUU(18) GUUCCGAACCCGUCGACUGUU(19) UCCCAGUUCCGAACCCGUCGA(26) GUUCCGAACCCGUCGACUGUUG(4) UUCCGAACCCGUCGACUGUUG(5)	CCAGUUCCGAACCCGUCGACUGUUGGCGGGCUGCUUAAGCUGCUAACGUGGCGAGAGCGGACCGCCUCGUGUCGGCCGGGGGACGGACUGGA	445	466	+ [Positive strand]	14	22	91	374	464	({{{{={{{=={{{{{{{{{==..(((((.((((((..((..(....)..))..)))))).)))))....>>>>>>-->>>-->>>>>>>>	-53.3	-58.5714	68.1319	375	396	0.009901
Bju-N32	gi|226885599|gb|FP318228.1|FP318228 FP318228 Brassica naps BAC library (JBnB) Brassica naps genomic clone JBnB022L15	GUCGGCCGGGGGACGGACUGGA	CCAGUUCCGAACCCGUCGACUG(127) CAGUUCCGAACCCGUCGACUG(348) CCAGUUCCGAACCCGUCGACU(18) CCCAGUUCCGAACCCGUCGACU(72) CAGUUCCGAACCCGUCGACUGU(70) AGUUCCGAACCCGUCGACUGU(168) CCCAGUUCCGAACCCGUCGAC(33) UCCCAGUUCCGAACCCGUCGAC(33) AGUUCCGAACCCGUCGACUGUU(18) GUUCCGAACCCGUCGACUGUU(19) UCCCAGUUCCGAACCCGUCGA(26) GUUCCGAACCCGUCGACUGUUG(4) UUCCGAACCCGUCGACUGUUG(5)	CCAGUUCCGAACCCGUCGACUGUUGGCGGGCUGCUUAAGCUGCUAACGUGGCGAGAGCGGACCGCCUCGUGUCGGCCGGGGGACGGACUGGA	446	467	+ [Positive strand]	14	22	91	375	465	({{{{={{{=={{{{{{{{{==..(((((.((((((..((..(....)..))..)))))).)))))....>>>>>>-->>>-->>>>>>>>	-53.3	-58.5714	68.1319	376	397	0.009901
Bju-N32	gi|27001865|gb|BZ492703.1|BZ492703 BONPH55TF BO_1.6_2_KB_tot Brassica oleracea genomic clone BONPH55	GUCGGCCGGGGGACGGACUGGA	CCAGUUCCGAACCCGUCGACUG(127) CAGUUCCGAACCCGUCGACUG(348) CCAGUUCCGAACCCGUCGACU(18) CCCAGUUCCGAACCCGUCGACU(72) CAGUUCCGAACCCGUCGACUGU(70) AGUUCCGAACCCGUCGACUGU(168) CCCAGUUCCGAACCCGUCGAC(33) UCCCAGUUCCGAACCCGUCGAC(33) AGUUCCGAACCCGUCGACUGUU(18) GUUCCGAACCCGUCGACUGUU(19) UCCCAGUUCCGAACCCGUCGA(26) GUUCCGAACCCGUCGACUGUUG(4) UUCCGAACCCGUCGACUGUUG(5)	CCAGUUCCGAACCCGUCGACUGUUGGCGGGCUGCUUGAGCCGCUAACGUGGCGAGAGCGGACCGCCUCGGUCGGCCGGGGGACGGACUGGA	6	27	- [Negative strand]	14	22	90	6	95	({{{{={{{=={{{{{{{{{{{..(((((.((((((..(((((....)))))..)))))).))))).))>>>>>>-->>>-->>>>>>>>	-60.3	-67	71.1111	73	93	0.009901
Bju-N32	gi|33777800|gb|CC944934.1|CC944934 BOIEK30TR BO_1.4_1.6_KB_nc Brassica oleracea genomic clone BOIEK30	GUCGGCCGGGGGACGGACUGGA	CCAGUUCCGAACCCGUCGACUG(127) CAGUUCCGAACCCGUCGACUG(348) CCAGUUCCGAACCCGUCGACU(18) CCCAGUUCCGAACCCGUCGACU(72) CAGUUCCGAACCCGUCGACUGU(70) AGUUCCGAACCCGUCGACUGU(168) CCCAGUUCCGAACCCGUCGAC(33) UCCCAGUUCCGAACCCGUCGAC(33) AGUUCCGAACCCGUCGACUGUU(18) GUUCCGAACCCGUCGACUGUU(19) UCCCAGUUCCGAACCCGUCGA(26) GUUCCGAACCCGUCGACUGUUG(4) UUCCGAACCCGUCGACUGUUG(5)	CCAGUUCCGAACCCGUCGACUGUUGGCGGGCUGCUUGAGCCGCUAACGUGGCGAGAGCGGACCGCCUCGUGUCGGCCGGGGGACGGACUGGA	78	99	- [Negative strand]	14	22	91	78	168	({{{{={{{=={{{{{{{{{==..(((((.((((((..(((((....)))))..)))))).)))))....>>>>>>-->>>-->>>>>>>>	-57.1	-62.7473	70.3297	146	166	0.009901
Bju-N33	gi|26685533|gb|BZ434845.1|BZ434845 BONFL90TR BO_1.6_2_KB_tot Brassica oleracea genomic clone BONFL90	CGGGCGUGAGCAGCACUCGGU	UCGACCAGAGGCUGUUCACCU(1)	UCGACCAGAGGCUGUUCACCUUGGAGACCUGAUGCGGUUAUGAGUACGACCGGGCGUGAGCAGCACUCGGUC	8	28	- [Negative strand]	15	21	70	6	75	((((.(((((((((((((((((.(..((.(((....))).))..)..)>>>>->>>>>>>>>->>>>>>)	-31.9	-45.5714	60	56	74	0.009901
Bju-N34	gi|18739125|gb|BH672695.1|BH672695 BOHWO53TF BO_2_3_KB Brassica oleracea genomic clone BOHWO53	CGCGGGUAAACGGCGGGAGUU	GAUUUCUGCCCAGUGCUCUGA(7) UGAUUUCUGCCCAGUGCUCUGA(12) AUUUCUGCCCAGUGCUCUGA(2) GAUUUCUGCCCAGUGCUCUGAA(6) UGAUUUCUGCCCAGUGCUCUG(3) AUUUCUGCCCAGUGCUCUGAA(5) UUUCUGCCCAGUGCUCUGAA(3) UGAUUUCUGCCCAGUGCUCU(3) GUGAUUUCUGCCCAGUGCUCU(2) UGUGAUUUCUGCCCAGUGCUCU(1) AUGUGAUUUCUGCCCAGUGCUC(2)	GUGAUUUCUGCCCAGUGCUCUGAACGUCAAAGUGAAGAAAUUCAACCAAGCGCGGGUAAACGGCGGGAGUUAC	330	350	- [Negative strand]	14	21	73	327	399	({{{{{{{{{{{==={{{{{===.(((.....((((....)))).....)>>->>>>>--->>>>>>>>>>))	-24.7	-33.8356	50.6849	376	397	0.039604
Bju-N34	gi|23417645|gb|BH937579.1|BH937579 odg57h12.b1 B.oleracea002 Brassica oleracea genomic	CGCGGGUAAACGGCGGGAGUU	GAUUUCUGCCCAGUGCUCUGA(7) UGAUUUCUGCCCAGUGCUCUGA(12) AUUUCUGCCCAGUGCUCUGA(2) GAUUUCUGCCCAGUGCUCUGAA(6) UGAUUUCUGCCCAGUGCUCUG(3) AUUUCUGCCCAGUGCUCUGAA(5) UUUCUGCCCAGUGCUCUGAA(3) UGAUUUCUGCCCAGUGCUCU(3) GUGAUUUCUGCCCAGUGCUCU(2) UGUGAUUUCUGCCCAGUGCUCU(1) AUGUGAUUUCUGCCCAGUGCUC(2)	GUGAUUUCUGCCCAGUGCUCUGAACGUCAAAGUGAAGAAAUUCAACCAAGCGCGGGUAAACGGCGGGAGUUAC	53	73	- [Negative strand]	14	21	73	50	122	({{{{{{{{{{{==={{{{{===.(((.....((((....)))).....)>>->>>>>--->>>>>>>>>>))	-24.7	-33.8356	50.6849	99	120	0.029703
Bju-N34	gi|23417683|gb|BH937617.1|BH937617 odg57f12.b1 B.oleracea002 Brassica oleracea genomic	CGCGGGUAAACGGCGGGAGUU	GAUUUCUGCCCAGUGCUCUGA(7) UGAUUUCUGCCCAGUGCUCUGA(12) AUUUCUGCCCAGUGCUCUGA(2) GAUUUCUGCCCAGUGCUCUGAA(6) UGAUUUCUGCCCAGUGCUCUG(3) AUUUCUGCCCAGUGCUCUGAA(5) UUUCUGCCCAGUGCUCUGAA(3) UGAUUUCUGCCCAGUGCUCU(3) GUGAUUUCUGCCCAGUGCUCU(2) UGUGAUUUCUGCCCAGUGCUCU(1) AUGUGAUUUCUGCCCAGUGCUC(2)	GUGAUUUCUGCCCAGUGCUCUGAACGUCAAAGUGAAGAAAUUCAACCAAGCGCGGGUAAACGGCGGGAGUUAC	51	71	- [Negative strand]	14	21	73	48	120	({{{{{{{{{{{==={{{{{===.(((.....((((....)))).....)>>->>>>>--->>>>>>>>>>))	-24.7	-33.8356	50.6849	97	118	0.049505
Bju-N34	gi|23562339|gb|BZ011481.1|BZ011481 oep84g02.b1 B.oleracea002 Brassica oleracea genomic	CGCGGGUAAACGGCGGGAGUU	GAUUUCUGCCCAGUGCUCUGA(7) UGAUUUCUGCCCAGUGCUCUGA(12) AUUUCUGCCCAGUGCUCUGA(2) GAUUUCUGCCCAGUGCUCUGAA(6) UGAUUUCUGCCCAGUGCUCUG(3) AUUUCUGCCCAGUGCUCUGAA(5) UUUCUGCCCAGUGCUCUGAA(3) UGAUUUCUGCCCAGUGCUCU(3) GUGAUUUCUGCCCAGUGCUCU(2)	GUGAUUUCUGCCCAGUGCUCUGAACGUCAAAGUGAAGAAAUUCAACCAAGCGCGGGUAAACGGCGGGAGUUAC	157	177	- [Negative strand]	14	21	73	154	226	({{{{{{{{{{{==={{{{{===.(((.....((((....)))).....)>>->>>>>--->>>>>>>>>>))	-24.7	-33.8356	50.6849	203	224	0.009901
Bju-N35	gi|26742526|gb|BZ460201.1|BZ460201 BONDW76TF BO_1.6_2_KB_tot Brassica oleracea genomic clone BONDW76	CAGAGCCUACAGACACUAGCUA	UAGUUGGUCUGUAGUUGGGUGC(7) AGUUGGUCUGUAGUUGGGUGC(2) UAGUUGGUCUGUAGUUGGGUG(16) AUAGUUGGUCUGUAGUUGGGUG(15) AGUUGGUCUGUAGUUGGGUGCG(4) GUUGGUCUGUAGUUGGGUGCG(15) AUAGUUGGUCUGUAGUUGGGU(1) GUUGGUCUGUAGUUGGGUGCGC(16) UUGGUCUGUAGUUGGGUGCGC(1) GGAUAGUUGGUCUGUAGUUGGG(4) UUGGUCUGUAGUUGGGUGCGCG(7) UGGUCUGUAGUUGGGUGCGCG(12)	UGAGAAGGAUAGUUGGUCUGUAGUUGGGUGCGCGAGCACAGAGCCUACAGACACUAGCUAUCCAAUCA	40	61	- [Negative strand]	12	22	68	31	98	(((...((({{{{{{{{{{{{{{{{=={{{(....)))>-->>->>>>>>>>->->>>>>)))..)))	-33.4	-49.1176	50	68	88	0.009901
Bju-N36	gi|23601362|gb|BZ030692.1|BZ030692 oek64d03.g1 B.oleracea002 Brassica oleracea genomic	UGGCCACGCGGAUAUGGACCC	GGGAGAGGAUCCAUCCGUGGG(2)	UGUGGCCACGCGGAUAUGGACCCAUGCUUACGGCCCAUUUGAAUACCCGGGAGAGGAUCCAUCCGUGGGUUGCA	101	121	- [Negative strand]	4	21	74	49	122	((--<<<-<<<<<<--<<<<-<<...((..(((.............))}==}}=}}=}}}}}}}}}}}})..))	-30.12	-40.7027	58.1081	53	73	0.049505
Bju-N37	gi|211915821|gb|FP019904.1|FP019904 FP019904 Brassica naps BAC library (JBnB) Brassica naps genomic clone JBnB044F21	CGUGUCGGCUGGGGGACGGAC	GUUCCGAACCCGUCGACUGUU(19) AGUUCCGAACCCGUCGACUGUU(18) UUCCGAACCCGUCGACUGUU(16) GUUCCGAACCCGUCGACUGU(42) GUUCCGAACCCGUCGACUGUUG(4) AGUUCCGAACCCGUCGACUGU(168) UUCCGAACCCGUCGACUGUUG(5) CAGUUCCGAACCCGUCGACUGU(70) UCCGAACCCGUCGACUGUUG(8) AGUUCCGAACCCGUCGACUG(56) UUCCGAACCCGUCGACUGUUGG(4) CAGUUCCGAACCCGUCGACUG(348) UCCGAACCCGUCGACUGUUGG(30) CCAGUUCCGAACCCGUCGACUG(127) CCGAACCCGUCGACUGUUGG(23) CAGUUCCGAA…	UCCCAGUUCCGAACCCGUCGACUGUUGGCGGGCUGCUUGAGCUGCUAACGUGGCGAGAGCGGACCGCCUCGUGUCGGCUGGGGGACGGACUGGGA	121	141	+ [Positive strand]	6	21	95	51	145	(((((((.{{{=={{{{{{{{{===={{{((.((((((..((..(....)..))..)))))).))))).--->>>>>>-->>>-->>>>>)))))	-59.5	-62.6316	67.3684	59	80	0.009901
Bju-N37	gi|237759970|gb|CU979098.2|CU979098 CU979098 Brassica naps BAC library (JBnB) Brassica naps genomic clone JBnB085L22	CGUGUCGGCUGGGGGACGGAC	GUUCCGAACCCGUCGACUGUU(19) AGUUCCGAACCCGUCGACUGUU(18) UUCCGAACCCGUCGACUGUU(16) GUUCCGAACCCGUCGACUGU(42) GUUCCGAACCCGUCGACUGUUG(4) AGUUCCGAACCCGUCGACUGU(168) UUCCGAACCCGUCGACUGUUG(5) CAGUUCCGAACCCGUCGACUGU(70) UCCGAACCCGUCGACUGUUG(8) AGUUCCGAACCCGUCGACUG(56) UUCCGAACCCGUCGACUGUUGG(4) CAGUUCCGAACCCGUCGACUG(348) UCCGAACCCGUCGACUGUUGG(30) CCAGUUCCGAACCCGUCGACUG(127) CCGAACCCGUCGACUGUUGG(23) CAGUUCCGAA…	UCCCAGUUCCGAACCCGUCGACUGUUGGCGGGCUGCUUGAGCUGCUAACGUGGCGAGAGCGGACCGCCUCGUGUCGGCUGGGGGACGGACUGGGA	444	464	+ [Positive strand]	6	21	95	374	468	(((((((.{{{=={{{{{{{{{===={{{((.((((((..((..(....)..))..)))))).))))).--->>>>>>-->>>-->>>>>)))))	-59.5	-62.6316	67.3684	382	403	0.009901
Bju-N37	gi|26729631|gb|BZ454015.1|BZ454015 BONCM45TR BO_1.6_2_KB_tot Brassica oleracea genomic clone BONCM45	CGUGUCGGCUGGGGGACGGAC	GUUCCGAACCCGUCGAUUGU(1)	CCAGUUCCGAACCCGUCGAUUGUGGGCGGCUGCUUGAGCCGCUAACGUGGCGAGAGCGGAGAGCCUCGUGUCGGCUGGGGGACGGACUUGG	593	613	- [Negative strand]	6	21	91	588	678	((({={{{{=={{{{{{{{{===((((..((((((..(((((....)))))..))))))...))))--->>>>>>-->>>-->>>>-))))	-49.6	-54.5055	67.033	655	674	0.009901
Bju-N4	gi|150872688|gb|ES903146.1|ES903146 BNARO4GH_T3_009_C07_24NOV2006_059 Brassica naps BNARO4GH Brassica naps cDNA 5'	ACAGGGAACAAGCAGAGCAUG	AUGCACUGCCUCUUCCCUGGC(57) UGCACUGCCUCUUCCCUGGC(4)	GAGAGAGACAGGGAACAAGCAGAGCAUGGAUUGAGUUUUUACCAAAACAUCAAAUGACUAUGUUUGGUCUCUUCCCAUGCACUGCCUCUUCCCUGGCUCCCUC	60	80	+ [Positive strand]	526	21	103	52	154	(((.(((-<<<<<<<---<<<<-<<<<<(.(((((((((....))))).))))..(((((....))))).....))}}}}=}}}}===}}}}}}}=})).)))	-43.5	-42.233	47.5728	128	149	0.009901
Bju-N6	gi|151268434|gb|EV178795.1|EV178795 0148886 Brassica naps Etiolated seedlings (pSPORT1) Brassica naps cDNA	UUUCAUCUUAGAGAAUGUUGUU	CAACAGUCUCAGGAUGGAAAA(1) AAGACAACAGUCUCAGGAUGG(1)	UUAAGACAACAGUCUCAGGAUGGAAAAUGCUUUUGACUUAUGUAACCGUGAUCAAAUCUCGCAGCCAAAACUAAGUAAAAAGUAUUUUUCAUCUUAGAGAAUGUUGUUUUGA	577	598	+ [Positive strand]	153	22	112	490	601	(((((({{{{{={{{{{{{{{{{{{{{(((((((.(((((.((..(.((((.......)))).).....))))))).)))))))))>>>>>>>>>->>>>->>>>>>>))))	-42	-37.5	33.0357	496	517	0.009901
Bju-N8	gi|151223556|gb|EV133982.1|EV133982 0169108 Brassica naps Flower Brassica naps cDNA	UGAAGCUGCCAGCAUGAUCU	ACCAGAUCAUCCUGCGGCUUC(1) CCAGAUCAUCCUGCGGCUUCA(3) AGAUCAUCCUGCGGCUUCAUU(8)	UGUUGGUUUUGGGAGGCUGAAGCUGCCAGCAUGAUCUGAUAGUGGUACCAGAUCAUCCUGCGGCUUCAUUCACUCAAAUCACCAACA	412	431	- [Negative strand]	149	20	87	361	447	(((((((((((((.(..<<<<<<<<<-<<-<<<<<<<(..........)}}}}}}}=}}}}}}}}}}}==).))))))..)))))))	-41	-47.1264	48.2759	377	397	0.009901
Bju-N8	gi|151223737|gb|EV134163.1|EV134163 0169289 Brassica naps Flower Brassica naps cDNA	UGAAGCUGCCAGCAUGAUCU	ACCAGAUCAUCCUGCGGCUUC(1) CCAGAUCAUCCUGCGGCUUCA(3) AGAUCAUCCUGCGGCUUCAUU(8)	UGUUGGUUUUGGGAGGCUGAAGCUGCCAGCAUGAUCUGAUAGUGGUACCAGAUCAUCCUGCGGCUUCAUUCACUCAAAUUACCAACA	257	276	+ [Positive strand]	149	20	87	239	325	(((((((((((((.(..<<<<<<<<<-<<-<<<<<<<(..........)}}}}}}}=}}}}}}}}}}}==).))))))..)))))))	-41	-47.1264	47.1264	288	309	0.009901
Bju-N9	gi|18751929|gb|BH681486.1|BH681486 BOMMY46TF BO_2_3_KB Brassica oleracea genomic clone BOMMY46	UCGGGAAGAUUAUGAGAGCAUG	CGUGCUUUCGGAGUCUUGCAA(1)	GCGUGCUUUCGGAGUCUUGCAAGCUCGAUUUGCCAUUGUUAAAAAUCCAGCACUUUGUUGGGAUAAAGUAAAGAUCGGGAAGAUUAUGAGAGCAUGU	704	725	- [Negative strand]	83	22	97	702	798	({{{{{{{{{{={{{{{{====.((((((((..(.(((((......(((((.....)))))))))).)...)))>>>>>>>>>>>->>>>>>>>>>)	-32.1	-33.0928	42.268	776	796	0.019802
