# Supplementary material for: A Genome-Wide Perspective of miRNAome in Response to High Temperature, Salinity and Drought Stresses in Brassica juncea (Czern) L
Source: PLoS One. 2014 Mar 26;9(3):e92456. doi: 10.1371/journal.pone.0092456 (PMC3966790; doi:10.1371/journal.pone.0092456)
Supplement: Table S10 — Putative targets of conserved miRNAs predicted in B. rapa . (XLSX) [file pone.0092456.s014.xlsx]

## Sheet: Table S10
Table S10: Putative targets of conserved miRNAs predited in B. rapa.
miRNA_ID	Target_Acc.	Expectation	UPE	miRNA_start	miRNA_end	Target_start	Target_end	miRNA_aligned_fragmenU	Target_aligned_fragment	Inhibition	Target_Desc.	multiplicity
mir156_1	Bra004363	1	18.221	1	20	635	654	UGACAGAAGAGAGUGAGCAC	GUGCUUGCUCUCUUCUGUCA	Cleavage	[mRNA] locus=Scaffold000003:6792684:6793589:+	1
mir156_1	Bra030040	1	9.785	1	20	1073	1092	UGACAGAAGAGAGUGAGCAC	GUGCUCUCUCUCUUCUGUCA	Cleavage	[mRNA] locus=Scaffold000069:89553:91054:+	1
mir156_1	Bra027478	1	12.308	1	20	926	945	UGACAGAAGAGAGUGAGCAC	GUGCUCUCUCUCUUCUGUCA	Cleavage	[mRNA] locus=Scaffold000056:314929:316393:-	1
mir156_1	Bra030041	1	15.661	1	20	1019	1038	UGACAGAAGAGAGUGAGCAC	GUGCUCUCUCUCUUCUGUCA	Cleavage	[mRNA] locus=Scaffold000069:91840:93215:-	1
mir156_1	Bra004674	1	19.589	1	20	743	762	UGACAGAAGAGAGUGAGCAC	GUGCUCUCUCUCUUCUGUCA	Cleavage	[mRNA] locus=Scaffold000004:1325605:1327587:+	1
mir156_1	Bra010949	1	16.544	1	20	995	1014	UGACAGAAGAGAGUGAGCAC	GUGCUCUCUCUCUUCUGUCA	Cleavage	[mRNA] locus=Scaffold000010:4019774:4021210:+	1
mir156_1	Bra033671	1	10.161	1	20	845	864	UGACAGAAGAGAGUGAGCAC	GUGCUCUCUCUCUUCUGUCA	Cleavage	[mRNA] locus=Scaffold000089:561131:562706:-	1
mir156_1	Bra038324	1	18.14	1	20	677	696	UGACAGAAGAGAGUGAGCAC	GUGCUCUCUCUCUUCUGUCA	Cleavage	[mRNA] locus=Scaffold000144:107580:108706:-	1
mir156_1	Bra003305	1	13.436	1	20	566	585	UGACAGAAGAGAGUGAGCAC	GUGCUCUCUCUCUUCUGUCA	Cleavage	[mRNA] locus=Scaffold000003:1052993:1054239:-	1
mir156_1	Bra032822	1.5	12.406	1	20	998	1017	UGACAGAAGAGAGUGAGCAC	GUGCUUUCUCUCUUCUGUCA	Cleavage	[mRNA] locus=Scaffold000084:279348:280708:+	1
mir156_1	Bra014599	1.5	16.378	1	20	554	573	UGACAGAAGAGAGUGAGCAC	GUGUUCUCUCUCUUCUGUCA	Cleavage	[mRNA] locus=Scaffold000016:1460218:1461460:+	1
mir156_1	Bra022766	2	15.371	1	20	848	867	UGACAGAAGAGAGUGAGCAC	GCGCUCUCUCUCUUCUGUCA	Cleavage	[mRNA] locus=Scaffold000039:113377:114705:+	1
mir156_1	Bra024241	3	17.714	1	20	174	193	UGACAGAAGAGAGUGAGCAC	GUUCUUGUUCUCUUUUGUCA	Cleavage	[mRNA] locus=Scaffold000044:23848:26235:+	1
mir156_1	Bra035199	2.5	20.93	1	19	348	367	UGACAGAAGAGA-GUGAGCA	UGCUCAUGUCUCUUCUGUCA	Cleavage	[mRNA] locus=Scaffold000101:840251:841649:-	1
mir156_2	Bra004363	0.5	18.221	1	20	635	654	UGACAGAAGAGAGCGAGCAC	GUGCUUGCUCUCUUCUGUCA	Cleavage	[mRNA] locus=Scaffold000003:6792684:6793589:+	1
mir156_2	Bra030040	1	9.785	1	20	1073	1092	UGACAGAAGAGAGCGAGCAC	GUGCUCUCUCUCUUCUGUCA	Cleavage	[mRNA] locus=Scaffold000069:89553:91054:+	1
mir156_2	Bra027478	1	12.308	1	20	926	945	UGACAGAAGAGAGCGAGCAC	GUGCUCUCUCUCUUCUGUCA	Cleavage	[mRNA] locus=Scaffold000056:314929:316393:-	1
mir156_2	Bra030041	1	15.661	1	20	1019	1038	UGACAGAAGAGAGCGAGCAC	GUGCUCUCUCUCUUCUGUCA	Cleavage	[mRNA] locus=Scaffold000069:91840:93215:-	1
mir156_2	Bra004674	1	19.589	1	20	743	762	UGACAGAAGAGAGCGAGCAC	GUGCUCUCUCUCUUCUGUCA	Cleavage	[mRNA] locus=Scaffold000004:1325605:1327587:+	1
mir156_2	Bra010949	1	16.544	1	20	995	1014	UGACAGAAGAGAGCGAGCAC	GUGCUCUCUCUCUUCUGUCA	Cleavage	[mRNA] locus=Scaffold000010:4019774:4021210:+	1
mir156_2	Bra033671	1	10.161	1	20	845	864	UGACAGAAGAGAGCGAGCAC	GUGCUCUCUCUCUUCUGUCA	Cleavage	[mRNA] locus=Scaffold000089:561131:562706:-	1
mir156_2	Bra038324	1	18.14	1	20	677	696	UGACAGAAGAGAGCGAGCAC	GUGCUCUCUCUCUUCUGUCA	Cleavage	[mRNA] locus=Scaffold000144:107580:108706:-	1
mir156_2	Bra003305	1	13.436	1	20	566	585	UGACAGAAGAGAGCGAGCAC	GUGCUCUCUCUCUUCUGUCA	Cleavage	[mRNA] locus=Scaffold000003:1052993:1054239:-	1
mir156_2	Bra032822	1.5	12.406	1	20	998	1017	UGACAGAAGAGAGCGAGCAC	GUGCUUUCUCUCUUCUGUCA	Cleavage	[mRNA] locus=Scaffold000084:279348:280708:+	1
mir156_2	Bra014599	1.5	16.378	1	20	554	573	UGACAGAAGAGAGCGAGCAC	GUGUUCUCUCUCUUCUGUCA	Cleavage	[mRNA] locus=Scaffold000016:1460218:1461460:+	1
mir156_2	Bra024241	2.5	17.714	1	20	174	193	UGACAGAAGAGAGCGAGCAC	GUUCUUGUUCUCUUUUGUCA	Cleavage	[mRNA] locus=Scaffold000044:23848:26235:+	1
mir156_2	Bra022766	2	15.371	1	20	848	867	UGACAGAAGAGAGCGAGCAC	GCGCUCUCUCUCUUCUGUCA	Cleavage	[mRNA] locus=Scaffold000039:113377:114705:+	1
mir156_3	Bra004363	2	18.221	1	20	635	654	CGACAGAAGAGAGUGAGCAC	GUGCUUGCUCUCUUCUGUCA	Cleavage	[mRNA] locus=Scaffold000003:6792684:6793589:+	1
mir156_3	Bra030040	2	9.785	1	20	1073	1092	CGACAGAAGAGAGUGAGCAC	GUGCUCUCUCUCUUCUGUCA	Cleavage	[mRNA] locus=Scaffold000069:89553:91054:+	1
mir156_3	Bra027478	2	12.308	1	20	926	945	CGACAGAAGAGAGUGAGCAC	GUGCUCUCUCUCUUCUGUCA	Cleavage	[mRNA] locus=Scaffold000056:314929:316393:-	1
mir156_3	Bra030041	2	15.661	1	20	1019	1038	CGACAGAAGAGAGUGAGCAC	GUGCUCUCUCUCUUCUGUCA	Cleavage	[mRNA] locus=Scaffold000069:91840:93215:-	1
mir156_3	Bra004674	2	19.589	1	20	743	762	CGACAGAAGAGAGUGAGCAC	GUGCUCUCUCUCUUCUGUCA	Cleavage	[mRNA] locus=Scaffold000004:1325605:1327587:+	1
mir156_3	Bra010949	2	16.544	1	20	995	1014	CGACAGAAGAGAGUGAGCAC	GUGCUCUCUCUCUUCUGUCA	Cleavage	[mRNA] locus=Scaffold000010:4019774:4021210:+	1
mir156_3	Bra033671	2	10.161	1	20	845	864	CGACAGAAGAGAGUGAGCAC	GUGCUCUCUCUCUUCUGUCA	Cleavage	[mRNA] locus=Scaffold000089:561131:562706:-	1
mir156_3	Bra038324	2	18.14	1	20	677	696	CGACAGAAGAGAGUGAGCAC	GUGCUCUCUCUCUUCUGUCA	Cleavage	[mRNA] locus=Scaffold000144:107580:108706:-	1
mir156_3	Bra003305	2	13.436	1	20	566	585	CGACAGAAGAGAGUGAGCAC	GUGCUCUCUCUCUUCUGUCA	Cleavage	[mRNA] locus=Scaffold000003:1052993:1054239:-	1
mir156_3	Bra032822	2.5	12.406	1	20	998	1017	CGACAGAAGAGAGUGAGCAC	GUGCUUUCUCUCUUCUGUCA	Cleavage	[mRNA] locus=Scaffold000084:279348:280708:+	1
mir156_3	Bra014599	2.5	16.378	1	20	554	573	CGACAGAAGAGAGUGAGCAC	GUGUUCUCUCUCUUCUGUCA	Cleavage	[mRNA] locus=Scaffold000016:1460218:1461460:+	1
mir156_3	Bra032535	3	21.767	1	20	1150	1170	CGACAGAAGAG-AGUGAGCAC	GUGUUCACUGCUCUUCUGUUG	Cleavage	[mRNA] locus=Scaffold000082:542341:544917:+	1
mir156_3	Bra022766	3	15.371	1	20	848	867	CGACAGAAGAGAGUGAGCAC	GCGCUCUCUCUCUUCUGUCA	Cleavage	[mRNA] locus=Scaffold000039:113377:114705:+	1
mir156_4	Bra027478	1	12.696	1	21	926	946	UUGACAGAAGAAAGAGAGCAC	GUGCUCUCUCUCUUCUGUCAA	Cleavage	[mRNA] locus=Scaffold000056:314929:316393:-	1
mir156_4	Bra030040	1	9.791	1	21	1073	1093	UUGACAGAAGAAAGAGAGCAC	GUGCUCUCUCUCUUCUGUCAA	Cleavage	[mRNA] locus=Scaffold000069:89553:91054:+	1
mir156_4	Bra030041	1	14.88	1	21	1019	1039	UUGACAGAAGAAAGAGAGCAC	GUGCUCUCUCUCUUCUGUCAA	Cleavage	[mRNA] locus=Scaffold000069:91840:93215:-	1
mir156_4	Bra004674	1	19.741	1	21	743	763	UUGACAGAAGAAAGAGAGCAC	GUGCUCUCUCUCUUCUGUCAA	Cleavage	[mRNA] locus=Scaffold000004:1325605:1327587:+	1
mir156_4	Bra010949	1	16.596	1	21	995	1015	UUGACAGAAGAAAGAGAGCAC	GUGCUCUCUCUCUUCUGUCAA	Cleavage	[mRNA] locus=Scaffold000010:4019774:4021210:+	1
mir156_4	Bra016891	1	24.053	1	21	740	760	UUGACAGAAGAAAGAGAGCAC	GUGCUCUCUCUCUUCUGUCAA	Cleavage	[mRNA] locus=Scaffold000021:168659:170710:-	1
mir156_4	Bra033671	1	9.683	1	21	845	865	UUGACAGAAGAAAGAGAGCAC	GUGCUCUCUCUCUUCUGUCAA	Cleavage	[mRNA] locus=Scaffold000089:561131:562706:-	1
mir156_4	Bra003305	1	13.228	1	21	566	586	UUGACAGAAGAAAGAGAGCAC	GUGCUCUCUCUCUUCUGUCAA	Cleavage	[mRNA] locus=Scaffold000003:1052993:1054239:-	1
mir156_4	Bra032822	1.5	13.733	1	21	998	1018	UUGACAGAAGAAAGAGAGCAC	GUGCUUUCUCUCUUCUGUCAA	Cleavage	[mRNA] locus=Scaffold000084:279348:280708:+	1
mir156_4	Bra038324	1.5	18.269	1	21	677	697	UUGACAGAAGAAAGAGAGCAC	GUGCUCUCUCUCUUCUGUCAG	Cleavage	[mRNA] locus=Scaffold000144:107580:108706:-	1
mir156_4	Bra014599	1.5	16.448	1	21	554	574	UUGACAGAAGAAAGAGAGCAC	GUGUUCUCUCUCUUCUGUCAA	Cleavage	[mRNA] locus=Scaffold000016:1460218:1461460:+	1
mir156_4	Bra035616	3	15.197	1	21	822	842	UUGACAGAAGAAAGAGAGCAC	GAGUUCUCUUUCUUCAGUCAA	Cleavage	[mRNA] locus=Scaffold000107:398184:399654:-	1
mir156_4	Bra004954	2.5	20.488	1	20	58	77	UUGACAGAAGAAAGAGAGCA	AGCUCUCUUUCUGCUGUUAA	Cleavage	[mRNA] locus=Scaffold000004:2644634:2646182:+	1
mir156_4	Bra022766	3	15.287	1	21	848	868	UUGACAGAAGAAAGAGAGCAC	GCGCUCUCUCUCUUCUGUCAU	Cleavage	[mRNA] locus=Scaffold000039:113377:114705:+	1
mir156_4	Bra004363	3	18.151	1	21	635	655	UUGACAGAAGAAAGAGAGCAC	GUGCUUGCUCUCUUCUGUCAG	Cleavage	[mRNA] locus=Scaffold000003:6792684:6793589:+	1
mir156_4	Bra011136	2.5	13.341	1	20	3262	3281	UUGACAGAAGAAAGAGAGCA	UCUUCUCCUUCUUCUGUCAA	Cleavage	[mRNA] locus=Scaffold000011:642148:648077:+	1
mir156_4	Bra035396	2.5	17.86	1	20	1194	1213	UUGACAGAAGAAAGAGAGCA	UGCUUUAUUUAUUCUGUCAA	Translation	[mRNA] locus=Scaffold000104:612340:615024:+	1
mir157_1	Bra027478	1	12.696	1	21	926	946	UUGACAGAAGAUAGAGAGCAC	GUGCUCUCUCUCUUCUGUCAA	Cleavage	[mRNA] locus=Scaffold000056:314929:316393:-	1
mir157_1	Bra030040	1	9.791	1	21	1073	1093	UUGACAGAAGAUAGAGAGCAC	GUGCUCUCUCUCUUCUGUCAA	Cleavage	[mRNA] locus=Scaffold000069:89553:91054:+	1
mir157_1	Bra030041	1	14.88	1	21	1019	1039	UUGACAGAAGAUAGAGAGCAC	GUGCUCUCUCUCUUCUGUCAA	Cleavage	[mRNA] locus=Scaffold000069:91840:93215:-	1
mir157_1	Bra004674	1	19.741	1	21	743	763	UUGACAGAAGAUAGAGAGCAC	GUGCUCUCUCUCUUCUGUCAA	Cleavage	[mRNA] locus=Scaffold000004:1325605:1327587:+	1
mir157_1	Bra010949	1	16.596	1	21	995	1015	UUGACAGAAGAUAGAGAGCAC	GUGCUCUCUCUCUUCUGUCAA	Cleavage	[mRNA] locus=Scaffold000010:4019774:4021210:+	1
mir157_1	Bra016891	1	24.053	1	21	740	760	UUGACAGAAGAUAGAGAGCAC	GUGCUCUCUCUCUUCUGUCAA	Cleavage	[mRNA] locus=Scaffold000021:168659:170710:-	1
mir157_1	Bra033671	1	9.683	1	21	845	865	UUGACAGAAGAUAGAGAGCAC	GUGCUCUCUCUCUUCUGUCAA	Cleavage	[mRNA] locus=Scaffold000089:561131:562706:-	1
mir157_1	Bra003305	1	13.228	1	21	566	586	UUGACAGAAGAUAGAGAGCAC	GUGCUCUCUCUCUUCUGUCAA	Cleavage	[mRNA] locus=Scaffold000003:1052993:1054239:-	1
mir157_1	Bra032822	1.5	13.733	1	21	998	1018	UUGACAGAAGAUAGAGAGCAC	GUGCUUUCUCUCUUCUGUCAA	Cleavage	[mRNA] locus=Scaffold000084:279348:280708:+	1
mir157_1	Bra038324	1.5	18.269	1	21	677	697	UUGACAGAAGAUAGAGAGCAC	GUGCUCUCUCUCUUCUGUCAG	Cleavage	[mRNA] locus=Scaffold000144:107580:108706:-	1
mir157_1	Bra014599	1.5	16.448	1	21	554	574	UUGACAGAAGAUAGAGAGCAC	GUGUUCUCUCUCUUCUGUCAA	Cleavage	[mRNA] locus=Scaffold000016:1460218:1461460:+	1
mir157_1	Bra020968	2.5	20.182	1	20	368	387	UUGACAGAAGAUAGAGAGCA	UGCUCUCUGGUUUUUGUCAA	Translation	[mRNA] locus=Scaffold000032:1157692:1159632:-	1
mir157_1	Bra022766	3	15.287	1	21	848	868	UUGACAGAAGAUAGAGAGCAC	GCGCUCUCUCUCUUCUGUCAU	Cleavage	[mRNA] locus=Scaffold000039:113377:114705:+	1
mir157_1	Bra001239	3	19.206	1	21	3063	3083	UUGACAGAAGAUAGAGAGCAC	GUACUCUCUGUUUACUGUCAA	Cleavage	[mRNA] locus=Scaffold000001:6695099:6707173:-	1
mir157_1	Bra004363	3	18.151	1	21	635	655	UUGACAGAAGAUAGAGAGCAC	GUGCUUGCUCUCUUCUGUCAG	Cleavage	[mRNA] locus=Scaffold000003:6792684:6793589:+	1
mir157_1	Bra003592	3	20.484	1	20	139	158	UUGACAGAAGAUAGAGAGCA	UGUUCUUCAUCUUCUGUCAU	Cleavage	[mRNA] locus=Scaffold000003:2511181:2511849:-	1
mir158_1	Bra024786	2.5	18.949	1	20	1488	1507	UCCCAAAUGUAGACAAAGCA	UGCUUGGUCUACGUUUGGGU	Cleavage	[mRNA] locus=Scaffold000046:56445:58254:+	1
mir158_1	Bra013549	3	21.781	1	20	528	547	UCCCAAAUGUAGACAAAGCA	GGUUUUGUCUCCGUUUGGGA	Translation	[mRNA] locus=Scaffold000014:1719102:1721864:+	1
mir158_1	Bra027656	3	21.241	1	20	831	850	UCCCAAAUGUAGACAAAGCA	UGCUCUGUCUACGUUUGGUA	Cleavage	[mRNA] locus=Scaffold000057:322783:327040:-	1
mir158_1	Bra015512	3	22.204	1	20	1101	1119	UCCCAAAUGUAGACAAAGCA	UGCUUUGU-UAUGUUUGGGA	Cleavage	[mRNA] locus=Scaffold000018:2444726:2451660:-	1
mir159_1	Bra022888	1	15.41	1	21	830	850	UUUGGAUUGAAGGGAGCUCUA	UAGAGCUUCCUUCAGUCCAAA	Cleavage	[mRNA] locus=Scaffold000039:783656:785464:-	1
mir159_1	Bra021791	2	15.795	1	21	845	865	UUUGGAUUGAAGGGAGCUCUA	UAGAGCUUCCUUCAAACCAAA	Cleavage	[mRNA] locus=Scaffold000035:1187657:1189072:-	1
mir159_1	Bra035547	1.5	7.952	1	20	1110	1129	UUUGGAUUGAAGGGAGCUCU	AGAGCUCCCUUCAAACCAAA	Cleavage	[mRNA] locus=Scaffold000107:48135:49942:-	1
mir159_1	Bra007536	2	20.495	1	21	100	120	UUUGGAUUGAAGGGAGCUCUA	UGGAGCUCCAUUCGAUCCAAA	Cleavage	[mRNA] locus=Scaffold000006:3765071:3765972:-	1
mir159_1	Bra003413	2	23.689	1	21	100	120	UUUGGAUUGAAGGGAGCUCUA	UGGAGCUCCAUUCGAUCCAAA	Cleavage	[mRNA] locus=Scaffold000003:1633458:1634494:-	1
mir159_1	Bra002938	2	10.779	1	20	1161	1180	UUUGGAUUGAAGGGAGCUCU	AGAGUUCCCUUCAAACCAAA	Cleavage	[mRNA] locus=Scaffold000002:6187795:6189746:+	1
mir159_1	Bra012038	3	15.473	1	21	2183	2203	UUUGGAUUGAAGGGAGCUCUA	UGGAGCUCCCUUCAUUCCAAU	Cleavage	[mRNA] locus=Scaffold000012:995856:1000480:+	1
mir159_1	Bra025100	3	14.341	1	21	603	623	UUUGGAUUGAAGGGAGCUCUA	UGGAGAUCCUUUCGAUUCAAA	Cleavage	[mRNA] locus=Scaffold000046:1774014:1776058:+	1
mir159_1	Bra009957	3	9.918	1	21	675	695	UUUGGAUUGAAGGGAGCUCUA	UAAAGCUCCCUUCAAUGCAAG	Cleavage	[mRNA] locus=Scaffold000009:1931229:1933295:-	1
mir159_1	Bra026359	3	13.422	1	20	516	535	UUUGGAUUGAAGGGAGCUCU	UGAGCUCUCUUCAAUCCCAA	Cleavage	[mRNA] locus=Scaffold000051:761601:762768:+	1
mir159_1	Bra028997	2.5	12.243	1	20	1140	1159	UUUGGAUUGAAGGGAGCUCU	AGACCUCCCUUCAAACCAAA	Cleavage	[mRNA] locus=Scaffold000064:371647:373727:+	1
mir159_1	Bra019486	3	12.758	1	20	325	344	UUUGGAUUGAAGGGAGCUCU	GAAGCUCCCCUCAAUCCAAA	Translation	[mRNA] locus=Scaffold000028:1075709:1077319:+	1
mir159_1	Bra019555	3	21.262	1	20	1072	1091	UUUGGAUUGAAGGGAGCUCU	GGAGUUCCCAUCGGUCCAAA	Translation	[mRNA] locus=Scaffold000028:1824665:1827081:-	1
mir159_1	Bra004836	3	22.334	1	20	1108	1127	UUUGGAUUGAAGGGAGCUCU	GGAGUUCCCAUCGGUCCAAA	Translation	[mRNA] locus=Scaffold000004:2035186:2039155:+	1
mir160_1	Bra003665	0.5	22.397	1	21	1239	1259	UGCCUGGCUCCCUGUAUGCCA	UGGCAUGCAGGGAGCCAGGCA	Cleavage	[mRNA] locus=Scaffold000003:2893625:2895347:-	1
mir160_1	Bra015651	0.5	19.466	1	21	1257	1277	UGCCUGGCUCCCUGUAUGCCA	UGGCAUGCAGGGAGCCAGGCA	Cleavage	[mRNA] locus=Scaffold000019:163832:166070:-	1
mir160_1	Bra011955	1	18.961	1	20	1354	1373	UGCCUGGCUCCCUGUAUGCC	GGAAUACAGGGAGCCAGGCA	Cleavage	[mRNA] locus=Scaffold000012:458534:460909:-	1
mir160_1	Bra011162	1.5	20.243	1	20	1297	1316	UGCCUGGCUCCCUGUAUGCC	GGUUUACAGGGAGCCAGGCA	Cleavage	[mRNA] locus=Scaffold000011:778813:781257:-	1
mir160_1	Bra024109	1.5	20.452	1	20	1441	1460	UGCCUGGCUCCCUGUAUGCC	GGUUUACAGGGAGCCAGGCA	Cleavage	[mRNA] locus=Scaffold000043:1101912:1107100:+	1
mir160_2	Bra027636	2	16.047	1	21	230	250	UCAAUGCACUGAAAGUGACUA	UGGUUACUUUCAGUGUGUUGA	Cleavage	[mRNA] locus=Scaffold000057:177980:178954:+	1
mir160_2	Bra025516	1.5	18.273	1	21	698	718	UCAAUGCACUGAAAGUGACUA	UAGUCACUUUCAAUGCGUUGA	Translation	[mRNA] locus=Scaffold000048:652777:654210:+	1
mir160_2	Bra026884	2.5	19.771	1	20	432	451	UCAAUGCACUGAAAGUGACU	CAUCACUUUCAGUGCGUUGA	Cleavage	[mRNA] locus=Scaffold000053:960735:962114:+	1
mir160_2	Bra026882	2.5	20.498	1	21	653	673	UCAAUGCACUGAAAGUGACUA	UCGUCACUUUCAAUGCGUUGA	Translation	[mRNA] locus=Scaffold000053:942948:944652:+	1
mir160_2	Bra032669	3	16.787	1	21	1121	1141	UCAAUGCACUGAAAGUGACUA	UAGACACUUUUAGUGCAAUGA	Cleavage	[mRNA] locus=Scaffold000082:1152577:1157517:+	1
mir160_2	Bra011565	2.5	21.614	1	20	2226	2245	UCAAUGCACUGAAAGUGACU	GGUCUUUUUUAGUGCAUUGA	Cleavage	[mRNA] locus=Scaffold000011:2711100:2716811:-	1
mir160_2	Bra017434	3	23.862	1	21	704	724	UCAAUGCACUGAAAGUGACUA	UUGUUACUUACAGUGCGUUGA	Cleavage	[mRNA] locus=Scaffold000022:1007367:1009040:+	1
mir160_2	Bra022752	3	16.436	1	20	557	576	UCAAUGCACUGAAAGUGACU	AGACAGUUUCAGUGCAUUGU	Cleavage	[mRNA] locus=Scaffold000039:19955:21787:+	1
mir160_2	Bra031506	3	17.384	1	20	852	871	UCAAUGCACUGAAAGUGACU	AGUUGCCUUGAGUGCAUUGA	Translation	[mRNA] locus=Scaffold000076:1006852:1009444:-	1
mir160_3	Bra033293	2	18.374	1	21	2956	2977	UCGAUAA-ACCUCUGCAUCCAG	CUGGAUGCAGAGGUAUUAUCGA	Cleavage	[mRNA] locus=Scaffold000087:412442:419517:-	1
mir160_3	Bra019231	3	18.703	1	21	411	431	UCGAUAAACCUCUGCAUCCAG	CUCGGUGAAGAGGUUUAUCGG	Cleavage	[mRNA] locus=Scaffold000027:1136771:1139659:-	1
mir160_3	Bra010498	3	23.339	1	21	423	443	UCGAUAAACCUCUGCAUCCAG	CUCGGUGAAGAGGUUUAUCGG	Cleavage	[mRNA] locus=Scaffold000010:1616309:1619115:-	1
mir164_1	Bra022685	1	6.577	1	20	756	775	UGGAGAAGCAGGGCACGUGC	GCACGUGUCCUGUUUCUCCA	Cleavage	[mRNA] locus=Scaffold000038:1589599:1591355:-	1
mir164_1	Bra001586	1	19.61	1	20	636	655	UGGAGAAGCAGGGCACGUGC	GCACGUGUCCUGUUUCUCCA	Cleavage	[mRNA] locus=Scaffold000001:8439902:8441459:+	1
mir164_1	Bra021592	1	21.05	1	20	630	649	UGGAGAAGCAGGGCACGUGC	GCACGUGUCCUGUUUCUCCA	Cleavage	[mRNA] locus=Scaffold000034:2008592:2010137:+	1
mir164_1	Bra029313	1.5	13.029	1	21	632	652	UGGAGAAGCAGGGCACGUGCA	UUUACGUGCCCUGCUUCUCCA	Cleavage	[mRNA] locus=Scaffold000065:687291:688442:-	1
mir164_1	Bra009246	1.5	10.028	1	21	623	643	UGGAGAAGCAGGGCACGUGCA	UUUACGUGCCCUGCUUCUCCA	Cleavage	[mRNA] locus=Scaffold000008:3011688:3012706:-	1
mir164_1	Bra012960	1.5	10.933	1	20	633	652	UGGAGAAGCAGGGCACGUGC	UUACGUGCCCUGCUUCUCCA	Cleavage	[mRNA] locus=Scaffold000013:2589926:2591070:+	1
mir164_1	Bra028685	1.5	5.161	1	20	624	643	UGGAGAAGCAGGGCACGUGC	UUACGUGCCCUGCUUCUCCA	Cleavage	[mRNA] locus=Scaffold000063:204680:205897:-	1
mir164_1	Bra030820	1	13.149	1	20	660	679	UGGAGAAGCAGGGCACGUGC	GCAAGUGCCCUGCUUCUCCA	Cleavage	[mRNA] locus=Scaffold000073:88913:92944:+	1
mir164_1	Bra001480	1	12.794	1	20	612	631	UGGAGAAGCAGGGCACGUGC	GCAAGUGCCCUGCUUCUCCA	Cleavage	[mRNA] locus=Scaffold000001:7830513:7832592:+	1
mir164_1	Bra034713	1	10.829	1	20	606	625	UGGAGAAGCAGGGCACGUGC	GCAAGUGCCCUGCUUCUCCA	Cleavage	[mRNA] locus=Scaffold000098:174969:176920:-	1
mir164_1	Bra007810	2.5	22.346	1	20	93	112	UGGAGAAGCAGGGCACGUGC	GCACGUGCCCUGCCUCUCCU	Cleavage	[mRNA] locus=Scaffold000006:5083210:5086593:-	1
mir164_1	Bra025658	2.5	15.001	1	20	642	661	UGGAGAAGCAGGGCACGUGC	UCACGUGACCUGCUUCUCCG	Cleavage	[mRNA] locus=Scaffold000048:1661687:1662916:+	1
mir164_1	Bra028435	2.5	13.088	1	20	642	661	UGGAGAAGCAGGGCACGUGC	UCACGUGACCUGCUUCUCCG	Cleavage	[mRNA] locus=Scaffold000062:300439:301584:+	1
mir164_1	Bra023315	3	14.963	1	20	514	533	UGGAGAAGCAGGGCACGUGC	GUACGUGCUUUGUUUCUUUA	Cleavage	[mRNA] locus=Scaffold000041:30092:30717:+	1
mir164_1	Bra023173	3	16.303	1	20	514	533	UGGAGAAGCAGGGCACGUGC	GUACGUGCUUUGUUUCUUUA	Cleavage	[mRNA] locus=Scaffold000040:616201:616826:-	1
mir164_2	Bra022685	1	6.577	1	20	756	775	UGGAGAAGCAGGGCACGUGC	GCACGUGUCCUGUUUCUCCA	Cleavage	[mRNA] locus=Scaffold000038:1589599:1591355:-	1
mir164_2	Bra001586	1	19.61	1	20	636	655	UGGAGAAGCAGGGCACGUGC	GCACGUGUCCUGUUUCUCCA	Cleavage	[mRNA] locus=Scaffold000001:8439902:8441459:+	1
mir164_2	Bra021592	1	21.05	1	20	630	649	UGGAGAAGCAGGGCACGUGC	GCACGUGUCCUGUUUCUCCA	Cleavage	[mRNA] locus=Scaffold000034:2008592:2010137:+	1
mir164_2	Bra028685	1.5	5.161	1	21	623	643	UGGAGAAGCAGGGCACGUGCG	CUUACGUGCCCUGCUUCUCCA	Cleavage	[mRNA] locus=Scaffold000063:204680:205897:-	1
mir164_2	Bra012960	1.5	10.933	1	20	633	652	UGGAGAAGCAGGGCACGUGC	UUACGUGCCCUGCUUCUCCA	Cleavage	[mRNA] locus=Scaffold000013:2589926:2591070:+	1
mir164_2	Bra029313	1.5	13.029	1	20	633	652	UGGAGAAGCAGGGCACGUGC	UUACGUGCCCUGCUUCUCCA	Cleavage	[mRNA] locus=Scaffold000065:687291:688442:-	1
mir164_2	Bra009246	1.5	10.028	1	20	624	643	UGGAGAAGCAGGGCACGUGC	UUACGUGCCCUGCUUCUCCA	Cleavage	[mRNA] locus=Scaffold000008:3011688:3012706:-	1
mir164_2	Bra030820	1	13.149	1	20	660	679	UGGAGAAGCAGGGCACGUGC	GCAAGUGCCCUGCUUCUCCA	Cleavage	[mRNA] locus=Scaffold000073:88913:92944:+	1
mir164_2	Bra001480	1	12.794	1	20	612	631	UGGAGAAGCAGGGCACGUGC	GCAAGUGCCCUGCUUCUCCA	Cleavage	[mRNA] locus=Scaffold000001:7830513:7832592:+	1
mir164_2	Bra034713	1	10.829	1	20	606	625	UGGAGAAGCAGGGCACGUGC	GCAAGUGCCCUGCUUCUCCA	Cleavage	[mRNA] locus=Scaffold000098:174969:176920:-	1
mir164_2	Bra023173	3	16.303	1	21	513	533	UGGAGAAGCAGGGCACGUGCG	CGUACGUGCUUUGUUUCUUUA	Cleavage	[mRNA] locus=Scaffold000040:616201:616826:-	1
mir164_2	Bra023315	3	14.963	1	21	513	533	UGGAGAAGCAGGGCACGUGCG	CGUACGUGCUUUGUUUCUUUA	Cleavage	[mRNA] locus=Scaffold000041:30092:30717:+	1
mir164_2	Bra007810	2.5	22.346	1	20	93	112	UGGAGAAGCAGGGCACGUGC	GCACGUGCCCUGCCUCUCCU	Cleavage	[mRNA] locus=Scaffold000006:5083210:5086593:-	1
mir164_2	Bra025658	2.5	15.001	1	21	641	661	UGGAGAAGCAGGGCACGUGCG	CUCACGUGACCUGCUUCUCCG	Cleavage	[mRNA] locus=Scaffold000048:1661687:1662916:+	1
mir164_2	Bra028435	2.5	13.088	1	21	641	661	UGGAGAAGCAGGGCACGUGCG	CUCACGUGACCUGCUUCUCCG	Cleavage	[mRNA] locus=Scaffold000062:300439:301584:+	1
mir165_1	Bra032394	1.5	22.325	1	20	576	595	UCGGACCAGGCUUCAUCCCC	UGGGAUGAAGCCUGGUCCGG	Cleavage	[mRNA] locus=Scaffold000081:1047200:1051618:-	1
mir165_1	Bra021926	1.5	21.98	1	20	576	595	UCGGACCAGGCUUCAUCCCC	UGGGAUGAAGCCUGGUCCGG	Cleavage	[mRNA] locus=Scaffold000035:1929596:1933684:-	1
mir165_1	Bra020236	1.5	22.065	1	20	558	577	UCGGACCAGGCUUCAUCCCC	CGGGAUGAAGCCUGGUCCGG	Cleavage	[mRNA] locus=Scaffold000030:1008614:1012689:-	1
mir165_1	Bra002458	1.5	21.098	1	20	555	574	UCGGACCAGGCUUCAUCCCC	UGGGAUGAAGCCUGGUCCGG	Cleavage	[mRNA] locus=Scaffold000002:3359953:3364036:-	1
mir165_1	Bra008110	3	18.977	1	21	584	604	UCGGACCAGGCUUCAUCCCCC	GGUGGGUGAAGCUUGGUCUGG	Cleavage	[mRNA] locus=Scaffold000007:1810599:1812218:-	1
mir165_1	Bra038295	2.5	24.908	1	20	540	559	UCGGACCAGGCUUCAUCCCC	UGGUAUGAAGCCUGGUCCGG	Cleavage	[mRNA] locus=Scaffold000143:295042:299297:+	1
mir165_1	Bra005398	2.5	18.818	1	20	576	595	UCGGACCAGGCUUCAUCCCC	UGGUAUGAAGCCUGGUCCGG	Cleavage	[mRNA] locus=Scaffold000004:5242686:5247047:+	1
mir165_1	Bra004182	3	22.947	1	20	878	897	UCGGACCAGGCUUCAUCCCC	GGGGAUGGAGCCUGUUCUGG	Cleavage	[mRNA] locus=Scaffold000003:5825253:5826581:+	1
mir165_1	Bra004179	3	23.515	1	20	875	894	UCGGACCAGGCUUCAUCCCC	GGGGAUGGAGCCUGUUCUGG	Cleavage	[mRNA] locus=Scaffold000003:5801260:5803643:+	1
mir165_1	Bra032289	3	19.124	1	20	109	128	UCGGACCAGGCUUCAUCCCC	GGGGAAGAGGUUUGGUCUGA	Cleavage	[mRNA] locus=Scaffold000080:1213564:1213734:+	1
mir165_1	Bra028534	3	18.169	1	20	1240	1259	UCGGACCAGGCUUCAUCCCC	GCGGAUGAAGUAUGGUUCGA	Translation	[mRNA] locus=Scaffold000062:926731:931078:-	1
mir166_1	Bra032394	2	22.325	1	20	576	595	UCGGACCAGGCUUCAUUCCC	UGGGAUGAAGCCUGGUCCGG	Cleavage	[mRNA] locus=Scaffold000081:1047200:1051618:-	1
mir166_1	Bra021926	2	21.98	1	20	576	595	UCGGACCAGGCUUCAUUCCC	UGGGAUGAAGCCUGGUCCGG	Cleavage	[mRNA] locus=Scaffold000035:1929596:1933684:-	1
mir166_1	Bra020236	2	22.065	1	20	558	577	UCGGACCAGGCUUCAUUCCC	CGGGAUGAAGCCUGGUCCGG	Cleavage	[mRNA] locus=Scaffold000030:1008614:1012689:-	1
mir166_1	Bra002458	2	21.098	1	20	555	574	UCGGACCAGGCUUCAUUCCC	UGGGAUGAAGCCUGGUCCGG	Cleavage	[mRNA] locus=Scaffold000002:3359953:3364036:-	1
mir166_1	Bra038295	2.5	24.908	1	20	540	559	UCGGACCAGGCUUCAUUCCC	UGGUAUGAAGCCUGGUCCGG	Cleavage	[mRNA] locus=Scaffold000143:295042:299297:+	1
mir166_1	Bra005398	2.5	18.818	1	20	576	595	UCGGACCAGGCUUCAUUCCC	UGGUAUGAAGCCUGGUCCGG	Cleavage	[mRNA] locus=Scaffold000004:5242686:5247047:+	1
mir166_1	Bra032771	3	23.33	1	20	141	160	UCGGACCAGGCUUCAUUCCC	GGGAAUCAUGUCUGGUCUGA	Cleavage	[mRNA] locus=Scaffold000083:1024802:1027691:-	1
mir167_1	Bra015704	2.5	22.98	1	20	519	538	UGAAGCUGCCAGCAUGAUCU	AGAUGAUGCUGCUAGCUUCA	Translation	[mRNA] locus=Scaffold000019:429218:431361:+	1
mir167_1	Bra007672	3	17.384	1	20	398	417	UGAAGCUGCCAGCAUGAUCU	AGAUUAAGCUCGCAGUUUCA	Translation	[mRNA] locus=Scaffold000006:4442315:4442882:-	1
mir167_1	Bra037737	3	19.087	1	20	542	561	UGAAGCUGCCAGCAUGAUCU	AGAUCAUUAUGGCAGUUUUA	Cleavage	[mRNA] locus=Scaffold000132:448228:450907:+	1
mir167_1	Bra032584	3	17.099	1	20	987	1006	UGAAGCUGCCAGCAUGAUCU	AGAGCAUGCUGAUAGUUUCA	Translation	[mRNA] locus=Scaffold000082:771695:776402:+	1
mir167_1	Bra002277	3	18.326	1	20	933	953	UGAAGCUGCCA-GCAUGAUCU	AGAUCUUGCCUGGCAGCUUCA	Cleavage	[mRNA] locus=Scaffold000002:2248710:2250811:-	1
mir167_2	Bra037737	3	19.087	1	21	541	561	UGAAGCUGCCAGCAUGAUCUU	AAGAUCAUUAUGGCAGUUUUA	Cleavage	[mRNA] locus=Scaffold000132:448228:450907:+	1
mir167_2	Bra015704	2.5	22.98	1	21	518	538	UGAAGCUGCCAGCAUGAUCUU	GAGAUGAUGCUGCUAGCUUCA	Translation	[mRNA] locus=Scaffold000019:429218:431361:+	1
mir167_2	Bra032584	3	17.099	1	21	986	1006	UGAAGCUGCCAGCAUGAUCUU	AAGAGCAUGCUGAUAGUUUCA	Translation	[mRNA] locus=Scaffold000082:771695:776402:+	1
mir167_2	Bra002277	3	18.326	1	21	932	953	UGAAGCUGCCA-GCAUGAUCUU	AAGAUCUUGCCUGGCAGCUUCA	Cleavage	[mRNA] locus=Scaffold000002:2248710:2250811:-	1
mir167_2	Bra016770	3	23.355	1	21	1052	1071	UGAAGCUGCCAGCAUGAUCUU	AAGAUUAUGCUG-CAGCUUUA	Translation	[mRNA] locus=Scaffold000020:2250744:2256705:-	1
mir167_2	Bra007672	3	17.384	1	20	398	417	UGAAGCUGCCAGCAUGAUCU	AGAUUAAGCUCGCAGUUUCA	Translation	[mRNA] locus=Scaffold000006:4442315:4442882:-	1
mir168_1	Bra014136	3	17.936	1	21	437	457	UCGCUUGGUGCAGGUCGGGAA	UUCCCGAGCUGCAUCAAGCUA	Cleavage	[mRNA] locus=Scaffold000015:1783057:1788210:-	1
mir168_1	Bra032254	3	15.424	1	21	524	544	UCGCUUGGUGCAGGUCGGGAA	UUCCCGAGCUGCAUCAAGCUA	Cleavage	[mRNA] locus=Scaffold000080:814194:819848:-	1
mir168_1	Bra025084	3	21.818	1	20	603	622	UCGCUUGGUGCAGGUCGGGA	UCCCGCCUUGUAUCAAGUGA	Cleavage	[mRNA] locus=Scaffold000046:1686865:1688665:+	1
mir168_1	Bra013438	3	20.427	1	20	558	577	UCGCUUGGUGCAGGUCGGGA	UCACGAUUUUCACCAAGCGA	Translation	[mRNA] locus=Scaffold000014:1116843:1117463:+	1
mir169_3	Bra000503	3	20.218	1	21	521	541	UAGCCAAGGAUGACUUGCCUG	CAGGGAAGUCCUACUUGGCUA	Translation	[mRNA] locus=Scaffold000001:2692527:2694927:-	1
mir169_4	Bra011583	3	19.84	1	20	542	561	UGAGCCAAAGAUGACUUGCC	GUCAAGUCAUCUUCGGCUUA	Cleavage	[mRNA] locus=Scaffold000011:2809033:2810642:+	1
mir169_4	Bra000355	3	17.506	1	21	579	599	UGAGCCAAAGAUGACUUGCCG	CGCCAAUGCAUCUUUGGCUCA	Cleavage	[mRNA] locus=Scaffold000001:1939650:1941231:-	1
mir169_4	Bra038882	3	18.803	1	21	485	505	UGAGCCAAAGAUGACUUGCCG	CGUCAAGUCCUCUAUGGCUCA	Cleavage	[mRNA] locus=Scaffold000154:200408:201346:+	1
mir169_4	Bra040863	3	20.989	1	20	960	979	UGAGCCAAAGAUGACUUGCC	GGCAAGUCAUAUCUGGCUUG	Translation	[mRNA] locus=Scaffold000286:13854:16656:+	1
mir169_4	Bra008831	3	22.872	1	21	885	905	UGAGCCAAAGAUGACUUGCCG	UGGCAAGGCAGCUGUGGCUCA	Translation	[mRNA] locus=Scaffold000008:1224852:1226950:+	1
mir169_4	Bra023410	3	21.919	1	21	888	908	UGAGCCAAAGAUGACUUGCCG	UGGCAAGGCAGCUGUGGCUCA	Translation	[mRNA] locus=Scaffold000041:502937:505119:-	1
mir169_4	Bra023547	3	9.712	1	20	108	126	UGAGCCAAAGAUGACUUGCC	AGCAAGU-AUCUUUGGCUCA	Cleavage	[mRNA] locus=Scaffold000041:1108903:1110851:+	1
mir169_5	Bra000503	3	20.218	1	20	522	541	UAGCCAAGGAUGACUUGCCU	AGGGAAGUCCUACUUGGCUA	Translation	[mRNA] locus=Scaffold000001:2692527:2694927:-	1
mir171_1	Bra036812	0	19.351	1	21	333	353	UGAUUGAGCCGCGUCAAUAUC	GAUAUUGACGCGGCUCAAUCA	Cleavage	[mRNA] locus=Scaffold000121:240961:241999:+	1
mir171_1	Bra003311	0.5	18.135	1	21	480	500	UGAUUGAGCCGCGUCAAUAUC	GAUAUUGGCGCGGCUCAAUCA	Cleavage	[mRNA] locus=Scaffold000003:1093586:1095106:+	1
mir171_1	Bra037319	0.5	20.669	1	21	657	677	UGAUUGAGCCGCGUCAAUAUC	GAUAUUGGCGCGGCUCAAUCA	Cleavage	[mRNA] locus=Scaffold000128:46401:48089:-	1
mir171_1	Bra000375	0.5	17.771	1	21	822	842	UGAUUGAGCCGCGUCAAUAUC	GAUAUUGGCGCGGCUCAAUCA	Cleavage	[mRNA] locus=Scaffold000001:2035543:2037366:-	1
mir171_1	Bra028100	2	21.585	1	21	438	458	UGAUUGAGCCGCGUCAAUAUC	GAUAUUGUCACGGCUCAAUCA	Cleavage	[mRNA] locus=Scaffold000059:1405810:1407285:-	1
mir171_1	Bra001171	3	16.535	1	21	102	122	UGAUUGAGCCGCGUCAAUAUC	GAUAUUGACGCUGCUUGGUUA	Translation	[mRNA] locus=Scaffold000001:6332164:6332435:-	1
mir171_1	Bra001152	3	24.118	1	20	883	902	UGAUUGAGCCGCGUCAAUAU	AUGUUGGAGCUGCUCAAUCA	Translation	[mRNA] locus=Scaffold000001:6226250:6228504:+	1
mir171_1	Bra039431	3	23.935	1	20	883	902	UGAUUGAGCCGCGUCAAUAU	AUGUUGGAGCUGCUCAAUCA	Translation	[mRNA] locus=Scaffold000165:103823:105978:-	1
mir171_2	Bra003311	0	18.135	1	21	480	500	UGAUUGAGCCGCGCCAAUAUC	GAUAUUGGCGCGGCUCAAUCA	Cleavage	[mRNA] locus=Scaffold000003:1093586:1095106:+	1
mir171_2	Bra037319	0	20.669	1	21	657	677	UGAUUGAGCCGCGCCAAUAUC	GAUAUUGGCGCGGCUCAAUCA	Cleavage	[mRNA] locus=Scaffold000128:46401:48089:-	1
mir171_2	Bra000375	0	17.771	1	21	822	842	UGAUUGAGCCGCGCCAAUAUC	GAUAUUGGCGCGGCUCAAUCA	Cleavage	[mRNA] locus=Scaffold000001:2035543:2037366:-	1
mir171_2	Bra036812	1	19.351	1	21	333	353	UGAUUGAGCCGCGCCAAUAUC	GAUAUUGACGCGGCUCAAUCA	Cleavage	[mRNA] locus=Scaffold000121:240961:241999:+	1
mir171_2	Bra028100	2	21.585	1	21	438	458	UGAUUGAGCCGCGCCAAUAUC	GAUAUUGUCACGGCUCAAUCA	Cleavage	[mRNA] locus=Scaffold000059:1405810:1407285:-	1
mir171_2	Bra021392	3	13.858	1	21	1495	1515	UGAUUGAGCCGCGCCAAUAUC	GAUAUUGGUGAGAUUCAAUCA	Translation	[mRNA] locus=Scaffold000034:913386:917199:+	1
mir171_2	Bra039431	2.5	23.935	1	20	883	902	UGAUUGAGCCGCGCCAAUAU	AUGUUGGAGCUGCUCAAUCA	Translation	[mRNA] locus=Scaffold000165:103823:105978:-	1
mir171_2	Bra001152	2.5	24.118	1	20	883	902	UGAUUGAGCCGCGCCAAUAU	AUGUUGGAGCUGCUCAAUCA	Translation	[mRNA] locus=Scaffold000001:6226250:6228504:+	1
mir171_3	Bra003311	0.5	18.135	1	21	480	500	UGAUUGAGCCGUGCCAAUAUC	GAUAUUGGCGCGGCUCAAUCA	Cleavage	[mRNA] locus=Scaffold000003:1093586:1095106:+	1
mir171_3	Bra037319	0.5	20.669	1	21	657	677	UGAUUGAGCCGUGCCAAUAUC	GAUAUUGGCGCGGCUCAAUCA	Cleavage	[mRNA] locus=Scaffold000128:46401:48089:-	1
mir171_3	Bra000375	0.5	17.771	1	21	822	842	UGAUUGAGCCGUGCCAAUAUC	GAUAUUGGCGCGGCUCAAUCA	Cleavage	[mRNA] locus=Scaffold000001:2035543:2037366:-	1
mir171_3	Bra028100	1	21.585	1	21	438	458	UGAUUGAGCCGUGCCAAUAUC	GAUAUUGUCACGGCUCAAUCA	Cleavage	[mRNA] locus=Scaffold000059:1405810:1407285:-	1
mir171_3	Bra036812	1.5	19.351	1	21	333	353	UGAUUGAGCCGUGCCAAUAUC	GAUAUUGACGCGGCUCAAUCA	Cleavage	[mRNA] locus=Scaffold000121:240961:241999:+	1
mir171_3	Bra035763	3	14.502	1	21	140	160	UGAUUGAGCCGUGCCAAUAUC	GAUACUGGCAUGCCUCAAUUA	Translation	[mRNA] locus=Scaffold000109:213855:215130:+	1
mir171_3	Bra001152	3	24.118	1	20	883	902	UGAUUGAGCCGUGCCAAUAU	AUGUUGGAGCUGCUCAAUCA	Translation	[mRNA] locus=Scaffold000001:6226250:6228504:+	1
mir171_3	Bra039431	3	23.935	1	20	883	902	UGAUUGAGCCGUGCCAAUAU	AUGUUGGAGCUGCUCAAUCA	Translation	[mRNA] locus=Scaffold000165:103823:105978:-	1
mir171_3	Bra018445	3	18.502	1	20	565	584	UGAUUGAGCCGUGCCAAUAU	AUAUUGUUAGGGCUCGAUCA	Translation	[mRNA] locus=Scaffold000025:1435342:1437685:+	1
mir171_4	Bra025703	2.5	21.34	1	21	660	680	AGAUAUUAGUGCGGUUCAAUC	GAUUGAAGCGUACAAAUAUCU	Cleavage	[mRNA] locus=Scaffold000049:259747:264002:+	1
mir172_1	Bra020262	0.5	10.168	1	21	1100	1120	AGAAUCUUGAUGAUGCUGCAU	AUGCAGCAUCAUCAGGAUUCU	Cleavage	[mRNA] locus=Scaffold000030:1192969:1194964:-	1
mir172_1	Bra002510	0.5	11.912	1	21	1187	1207	AGAAUCUUGAUGAUGCUGCAU	AUGCAGCAUCAUCAGGAUUCU	Cleavage	[mRNA] locus=Scaffold000002:3648772:3651629:-	1
mir172_1	Bra017809	0.5	17.878	1	20	1182	1201	AGAAUCUUGAUGAUGCUGCA	UGCAGCAUCAUCAGGAUUCU	Cleavage	[mRNA] locus=Scaffold000023:1389680:1391841:-	1
mir172_1	Bra011741	0.5	16.152	1	20	1182	1201	AGAAUCUUGAUGAUGCUGCA	UGCAGCAUCAUCAGGAUUCU	Cleavage	[mRNA] locus=Scaffold000011:3574820:3576960:-	1
mir172_1	Bra007123	1.5	11.504	1	20	954	973	AGAAUCUUGAUGAUGCUGCA	UGCAGCAUCAUCAGGAUUCC	Cleavage	[mRNA] locus=Scaffold000006:1536840:1539976:-	1
mir172_1	Bra000487	1.5	16.594	1	20	1170	1189	AGAAUCUUGAUGAUGCUGCA	AGCAGCAUCAUCAGGAUUCU	Cleavage	[mRNA] locus=Scaffold000001:2590162:2592240:+	1
mir172_1	Bra011939	1.5	15.475	1	20	1278	1297	AGAAUCUUGAUGAUGCUGCA	AGCAGCAUCAUCAGGAUUCU	Cleavage	[mRNA] locus=Scaffold000012:319164:321471:+	1
mir172_1	Bra005019	1.5	11.454	1	20	114	133	AGAAUCUUGAUGAUGCUGCA	UGUAACAUCAUCAAGAUUCU	Cleavage	[mRNA] locus=Scaffold000004:2998183:3000757:+	1
mir172_1	Bra010496	3	14.819	1	20	3520	3539	AGAAUCUUGAUGAUGCUGCA	UGUGGCAUCAUUAAGAUUUC	Cleavage	[mRNA] locus=Scaffold000010:1605577:1609744:+	1
mir172_1	Bra026072	3	8.932	1	21	1210	1230	AGAAUCUUGAUGAUGCUGCAU	AUGUAUCAUCAACAAGGUUCU	Translation	[mRNA] locus=Scaffold000050:877226:881335:-	1
mir172_2	Bra020262	1	10.168	1	21	1100	1120	GGAAUCUUGAUGAUGCUGCAU	AUGCAGCAUCAUCAGGAUUCU	Cleavage	[mRNA] locus=Scaffold000030:1192969:1194964:-	1
mir172_2	Bra002510	1	11.912	1	21	1187	1207	GGAAUCUUGAUGAUGCUGCAU	AUGCAGCAUCAUCAGGAUUCU	Cleavage	[mRNA] locus=Scaffold000002:3648772:3651629:-	1
mir172_2	Bra007123	0.5	11.504	1	20	954	973	GGAAUCUUGAUGAUGCUGCA	UGCAGCAUCAUCAGGAUUCC	Cleavage	[mRNA] locus=Scaffold000006:1536840:1539976:-	1
mir172_2	Bra017809	1	17.878	1	20	1182	1201	GGAAUCUUGAUGAUGCUGCA	UGCAGCAUCAUCAGGAUUCU	Cleavage	[mRNA] locus=Scaffold000023:1389680:1391841:-	1
mir172_2	Bra011741	1	16.152	1	20	1182	1201	GGAAUCUUGAUGAUGCUGCA	UGCAGCAUCAUCAGGAUUCU	Cleavage	[mRNA] locus=Scaffold000011:3574820:3576960:-	1
mir172_2	Bra000487	2	16.594	1	20	1170	1189	GGAAUCUUGAUGAUGCUGCA	AGCAGCAUCAUCAGGAUUCU	Cleavage	[mRNA] locus=Scaffold000001:2590162:2592240:+	1
mir172_2	Bra011939	2	15.475	1	20	1278	1297	GGAAUCUUGAUGAUGCUGCA	AGCAGCAUCAUCAGGAUUCU	Cleavage	[mRNA] locus=Scaffold000012:319164:321471:+	1
mir172_2	Bra010496	2	14.819	1	20	3520	3539	GGAAUCUUGAUGAUGCUGCA	UGUGGCAUCAUUAAGAUUUC	Cleavage	[mRNA] locus=Scaffold000010:1605577:1609744:+	1
mir172_2	Bra005019	2	11.454	1	20	114	133	GGAAUCUUGAUGAUGCUGCA	UGUAACAUCAUCAAGAUUCU	Cleavage	[mRNA] locus=Scaffold000004:2998183:3000757:+	1
mir172_2	Bra017841	3	19.074	1	20	82	101	GGAAUCUUGAUGAUGCUGCA	UGCGGCGUCGUCAAGAAUCC	Cleavage	[mRNA] locus=Scaffold000023:1650119:1654872:-	1
mir172_2	Bra010605	3	19.366	1	20	82	101	GGAAUCUUGAUGAUGCUGCA	UGCGGCGUCGUCAAGAAUCC	Cleavage	[mRNA] locus=Scaffold000010:2269619:2275030:-	1
mir172_2	Bra039498	2.5	15.095	1	21	249	269	GGAAUCUUGAUGAUGCUGCAU	GUGUAGCAUAUUCAAGAUUCC	Translation	[mRNA] locus=Scaffold000166:205766:207265:-	1
mir172_2	Bra005529	3	20.01	1	20	940	959	GGAAUCUUGAUGAUGCUGCA	UGCAGCGUCACCAAGUUUCC	Translation	[mRNA] locus=Scaffold000004:6024939:6030809:-	1
mir172_3	Bra017809	0.5	17.878	1	21	1181	1201	AGAAUCUUGAUGAUGCUGCAG	CUGCAGCAUCAUCAGGAUUCU	Cleavage	[mRNA] locus=Scaffold000023:1389680:1391841:-	1
mir172_3	Bra011741	0.5	16.152	1	21	1181	1201	AGAAUCUUGAUGAUGCUGCAG	CUGCAGCAUCAUCAGGAUUCU	Cleavage	[mRNA] locus=Scaffold000011:3574820:3576960:-	1
mir172_3	Bra020262	0.5	10.168	1	20	1101	1120	AGAAUCUUGAUGAUGCUGCA	UGCAGCAUCAUCAGGAUUCU	Cleavage	[mRNA] locus=Scaffold000030:1192969:1194964:-	1
mir172_3	Bra002510	0.5	11.912	1	20	1188	1207	AGAAUCUUGAUGAUGCUGCA	UGCAGCAUCAUCAGGAUUCU	Cleavage	[mRNA] locus=Scaffold000002:3648772:3651629:-	1
mir172_3	Bra007123	1.5	11.504	1	21	953	973	AGAAUCUUGAUGAUGCUGCAG	UUGCAGCAUCAUCAGGAUUCC	Cleavage	[mRNA] locus=Scaffold000006:1536840:1539976:-	1
mir172_3	Bra000487	1.5	16.594	1	21	1169	1189	AGAAUCUUGAUGAUGCUGCAG	CAGCAGCAUCAUCAGGAUUCU	Cleavage	[mRNA] locus=Scaffold000001:2590162:2592240:+	1
mir172_3	Bra011939	1.5	15.475	1	21	1277	1297	AGAAUCUUGAUGAUGCUGCAG	CAGCAGCAUCAUCAGGAUUCU	Cleavage	[mRNA] locus=Scaffold000012:319164:321471:+	1
mir172_3	Bra005019	1.5	11.454	1	21	113	133	AGAAUCUUGAUGAUGCUGCAG	UUGUAACAUCAUCAAGAUUCU	Cleavage	[mRNA] locus=Scaffold000004:2998183:3000757:+	1
mir172_3	Bra010496	3	14.819	1	21	3519	3539	AGAAUCUUGAUGAUGCUGCAG	UUGUGGCAUCAUUAAGAUUUC	Cleavage	[mRNA] locus=Scaffold000010:1605577:1609744:+	1
mir172_3	Bra003899	3	20.168	1	21	592	612	AGAAUCUUGAUGAUGCUGCAG	CUGCAGAAGCAUGAAGAUUCU	Translation	[mRNA] locus=Scaffold000003:4174700:4176563:-	1
mir2111_3	Bra025251	0.5	21.3	1	20	208	227	UAAUCUGCAUCCUGAGGUUU	AGACCUCAGGAUGCAGAUUA	Cleavage	[mRNA] locus=Scaffold000047:806629:807930:-	1
mir2111_3	Bra032983	1	9.867	1	21	159	179	UAAUCUGCAUCCUGAGGUUUA	UAAACAUCAGGAUGCAGAUUA	Cleavage	[mRNA] locus=Scaffold000085:362178:363413:-	1
mir2111_3	Bra024236	3	15.232	1	21	303	323	UAAUCUGCAUCCUGAGGUUUA	UAAACCUGAGGAAGCAGAUUU	Translation	[mRNA] locus=Scaffold000043:1933049:1934155:-	1
mir2111_3	Bra031090	2.5	16.12	1	20	230	248	UAAUCUGCAUCCUGAGGUUU	AAACCUCAG-AUGCAGAUUG	Translation	[mRNA] locus=Scaffold000074:626719:627851:-	1
mir2111_3	Bra015544	3	12.398	1	20	1228	1247	UAAUCUGCAUCCUGAGGUUU	GAACUUCAAGUUGCAGAUUA	Translation	[mRNA] locus=Scaffold000018:2620734:2622680:+	1
mir2111_3	Bra018674	3	11.978	1	20	1117	1136	UAAUCUGCAUCCUGAGGUUU	GAAUCUCAGCCUGCAGAUUA	Translation	[mRNA] locus=Scaffold000026:502746:510458:-	1
mir319_1	Bra022888	2.5	16.013	1	20	830	849	UUGGACUGAAGGGAGCUCCC	UAGAGCUUCCUUCAGUCCAA	Cleavage	[mRNA] locus=Scaffold000039:783656:785464:-	1
mir319_1	Bra021586	2.5	15.583	1	20	820	839	UUGGACUGAAGGGAGCUCCC	AGGGGUUCCCUUCAGUCCAG	Cleavage	[mRNA] locus=Scaffold000034:1991174:1992226:+	1
mir319_1	Bra000531	2.5	24.368	1	20	872	891	UUGGACUGAAGGGAGCUCCC	UGGAGCUCCCUUCAUUCCAA	Cleavage	[mRNA] locus=Scaffold000001:2835649:2837136:+	1
mir319_1	Bra012038	2.5	15.242	1	20	2183	2202	UUGGACUGAAGGGAGCUCCC	UGGAGCUCCCUUCAUUCCAA	Cleavage	[mRNA] locus=Scaffold000012:995856:1000480:+	1
mir319_1	Bra019555	3	21.401	1	21	1070	1090	UUGGACUGAAGGGAGCUCCCU	AAGGAGUUCCCAUCGGUCCAA	Translation	[mRNA] locus=Scaffold000028:1824665:1827081:-	1
mir319_1	Bra004836	3	22.191	1	21	1106	1126	UUGGACUGAAGGGAGCUCCCU	AAGGAGUUCCCAUCGGUCCAA	Translation	[mRNA] locus=Scaffold000004:2035186:2039155:+	1
mir319_1	Bra027873	3	22.092	1	21	1121	1141	UUGGACUGAAGGGAGCUCCCU	ACGGAGUUCCCAUCGGUCCAA	Translation	[mRNA] locus=Scaffold000058:559695:561370:+	1
mir319_1	Bra004486	3	14.394	1	21	1122	1142	UUGGACUGAAGGGAGCUCCCU	AGGAAGUUCCCUUGAGUUCAA	Cleavage	[mRNA] locus=Scaffold000004:384786:388050:+	1
mir319_2	Bra021586	1.5	15.583	1	21	819	839	UUGGACUGAAGGGAGCUCCUU	GAGGGGUUCCCUUCAGUCCAG	Cleavage	[mRNA] locus=Scaffold000034:1991174:1992226:+	1
mir319_2	Bra019555	2	21.401	1	21	1070	1090	UUGGACUGAAGGGAGCUCCUU	AAGGAGUUCCCAUCGGUCCAA	Translation	[mRNA] locus=Scaffold000028:1824665:1827081:-	1
mir319_2	Bra004836	2	22.191	1	21	1106	1126	UUGGACUGAAGGGAGCUCCUU	AAGGAGUUCCCAUCGGUCCAA	Translation	[mRNA] locus=Scaffold000004:2035186:2039155:+	1
mir319_2	Bra036105	3	22.097	1	21	235	255	UUGGACUGAAGGGAGCUCCUU	AAGGAGCUUUCUUCGGUUCAU	Cleavage	[mRNA] locus=Scaffold000113:27884:31109:-	1
mir319_2	Bra022888	2.5	16.013	1	20	830	849	UUGGACUGAAGGGAGCUCCU	UAGAGCUUCCUUCAGUCCAA	Cleavage	[mRNA] locus=Scaffold000039:783656:785464:-	1
mir319_2	Bra029596	2.5	20.38	1	21	963	983	UUGGACUGAAGGGAGCUCCUU	AAGGGGCACUCUUCAGUCCAG	Cleavage	[mRNA] locus=Scaffold000067:120586:123823:-	1
mir319_2	Bra000531	2.5	24.368	1	20	872	891	UUGGACUGAAGGGAGCUCCU	UGGAGCUCCCUUCAUUCCAA	Cleavage	[mRNA] locus=Scaffold000001:2835649:2837136:+	1
mir319_2	Bra012038	2.5	15.242	1	20	2183	2202	UUGGACUGAAGGGAGCUCCU	UGGAGCUCCCUUCAUUCCAA	Cleavage	[mRNA] locus=Scaffold000012:995856:1000480:+	1
mir319_2	Bra027284	2.5	14.829	1	21	984	1004	UUGGACUGAAGGGAGCUCCUU	GAGGGGUCCCCUUCAGUCCAG	Cleavage	[mRNA] locus=Scaffold000055:636679:637899:-	1
mir319_2	Bra001579	2.5	15.082	1	21	987	1007	UUGGACUGAAGGGAGCUCCUU	GAGGGGUCCCCUUCAGUCCAG	Cleavage	[mRNA] locus=Scaffold000001:8400462:8401685:+	1
mir319_2	Bra005366	3	20.002	1	21	672	692	UUGGACUGAAGGGAGCUCCUU	GAGGAGCUCCUUUCAGCCUGA	Cleavage	[mRNA] locus=Scaffold000004:5042440:5046937:+	1
mir319_2	Bra030952	3	13.272	1	21	834	854	UUGGACUGAAGGGAGCUCCUU	GAGGGGUCCCCUUCAGUCCAU	Cleavage	[mRNA] locus=Scaffold000073:1031146:1032183:+	1
mir319_2	Bra027873	3	22.092	1	21	1121	1141	UUGGACUGAAGGGAGCUCCUU	ACGGAGUUCCCAUCGGUCCAA	Translation	[mRNA] locus=Scaffold000058:559695:561370:+	1
mir319_2	Bra013304	2.5	18.271	1	20	505	524	UUGGACUGAAGGGAGCUCCU	AGGGGGACCCUUCAGUCCAA	Cleavage	[mRNA] locus=Scaffold000014:323493:324212:-	1
mir319_2	Bra010789	2.5	17.229	1	20	685	704	UUGGACUGAAGGGAGCUCCU	AGGGGGACCCUUCAGUCCAA	Cleavage	[mRNA] locus=Scaffold000010:3243166:3244092:+	1
mir390_1	Bra028389	2	17.936	1	21	640	660	AAGCUCAGGAGGGAUAGCGCC	GGCGCUAUGCUUUCUGAGCUU	Cleavage	[mRNA] locus=Scaffold000062:16965:18560:+	1
mir390_1	Bra039902	3	18.812	1	20	665	684	AAGCUCAGGAGGGAUAGCGC	GCGUUGUCCUUCCUGAGUUG	Cleavage	[mRNA] locus=Scaffold000181:90199:91389:+	1
mir390_1	Bra023601	3	19.067	1	20	31	50	AAGCUCAGGAGGGAUAGCGC	GUGUUAUCUCUUCUGGGUUU	Cleavage	[mRNA] locus=Scaffold000041:1381839:1383298:+	1
mir390_1	Bra030167	3	19.408	1	21	457	477	AAGCUCAGGAGGGAUAGCGCC	GGUCCUAUUCCUGCUGAGCUU	Translation	[mRNA] locus=Scaffold000069:1075274:1084885:-	1
mir390_1	Bra008138	3	24.657	1	21	5077	5097	AAGCUCAGGAGGGAUAGCGCC	GGUGUUAUCCCAGCUGAGCUU	Translation	[mRNA] locus=Scaffold000007:1996509:2005644:-	1
mir391_1	Bra019831	3	4.062	1	21	54	74	UUCGCAGGAGAGAUAGCGCCA	UGCCGCUGUCUCUCCUCCGAA	Cleavage	[mRNA] locus=Scaffold000029:1382218:1383813:-	1
mir391_1	Bra013888	3	20.327	1	20	34	53	UUCGCAGGAGAGAUAGCGCC	GGUGCUGCUUUUCCUGCGAA	Cleavage	[mRNA] locus=Scaffold000014:3698723:3700917:+	1
mir391_1	Bra027310	3	19.066	1	20	668	687	UUCGCAGGAGAGAUAGCGCC	GGAGUUAUCUCUACUGUGAA	Cleavage	[mRNA] locus=Scaffold000055:790123:792213:-	1
mir393_1	Bra026953	1	19.839	1	21	1508	1528	UCCAAAGGGAUCGCAUUGAUC	GAACAAUGCGAUCCCUUUGGA	Cleavage	[mRNA] locus=Scaffold000053:1314037:1316328:+	1
mir393_1	Bra032954	1	17.796	1	22	1501	1522	UCCAAAGGGAUCGCAUUGAUCC	GAAACAAUGCGAUCCCUUUGGA	Cleavage	[mRNA] locus=Scaffold000085:162285:164666:+	1
mir393_1	Bra016754	1	19.498	1	22	1546	1567	UCCAAAGGGAUCGCAUUGAUCC	GAAACAAUGCGAUCCCUUUGGA	Cleavage	[mRNA] locus=Scaffold000020:2183447:2185705:+	1
mir393_1	Bra028335	3	16.675	1	22	33	54	UCCAAAGGGAUCGCAUUGAUCC	GGGUCAGAGCGAUCCCUUUGGC	Cleavage	[mRNA] locus=Scaffold000061:867945:869650:-	1
mir393_1	Bra003518	2.5	19.172	1	20	1518	1537	UCCAAAGGGAUCGCAUUGAU	GACAAUGCGAUCUCUUUGGA	Cleavage	[mRNA] locus=Scaffold000003:2115050:2117360:-	1
mir393_1	Bra007720	2.5	19.393	1	20	1518	1537	UCCAAAGGGAUCGCAUUGAU	GACAAUGCGAUCUCUUUGGA	Cleavage	[mRNA] locus=Scaffold000006:4621378:4623695:-	1
mir393_1	Bra034191	2	20.134	1	22	1504	1525	UCCAAAGGGAUCGCAUUGAUCC	GAAACCAUGCGAUCCCUUUGGA	Cleavage	[mRNA] locus=Scaffold000093:697100:699847:-	1
mir393_1	Bra005600	3	17.741	1	20	238	257	UCCAAAGGGAUCGCAUUGAU	AUCGAUGCGAUCUGUUUGGG	Cleavage	[mRNA] locus=Scaffold000004:6465538:6465910:-	1
mir393_1	Bra000842	2.5	18.784	1	22	1507	1528	UCCAAAGGGAUCGCAUUGAUCC	GAAACCAUGCGGUCCCUUUGGA	Cleavage	[mRNA] locus=Scaffold000001:4671973:4674515:+	1
mir393_1	Bra030115	3	18.719	1	20	307	326	UCCAAAGGGAUCGCAUUGAU	GUUGAUUCGAUUCCUUUGGA	Cleavage	[mRNA] locus=Scaffold000069:632743:633270:+	1
mir393_1	Bra003035	3	18.687	1	20	520	539	UCCAAAGGGAUCGCAUUGAU	AUCGAUGUGGUCAUUUUGGA	Cleavage	[mRNA] locus=Scaffold000002:6932563:6935298:-	1
mir393_1	Bra033859	3	23.962	1	21	93	113	UCCAAAGGGAUCGCAUUGAUC	GAACAAUGGGAGCCCUUUGGA	Translation	[mRNA] locus=Scaffold000091:300018:302101:+	1
mir394_1	Bra030038	1	17.054	1	20	1137	1156	UUGGCAUUCUGUCCACCUCC	GGAGGUUGACAGAAUGCCAA	Cleavage	[mRNA] locus=Scaffold000069:81441:83099:+	1
mir394_1	Bra032820	1	19.987	1	20	1146	1165	UUGGCAUUCUGUCCACCUCC	GGAGGUUGACAGAAUGCCAA	Cleavage	[mRNA] locus=Scaffold000084:269072:270975:+	1
mir394_1	Bra015681	2.5	13.933	1	20	1773	1792	UUGGCAUUCUGUCCACCUCC	GGAGAUGGACAGGAUGCUGA	Cleavage	[mRNA] locus=Scaffold000019:324687:327873:+	1
mir394_1	Bra027808	3	18.965	1	20	891	910	UUGGCAUUCUGUCCACCUCC	GGAGGUGGAUGGAGAGCCAA	Cleavage	[mRNA] locus=Scaffold000057:1382800:1385745:+	1
mir394_1	Bra033269	2.5	18.856	1	20	412	431	UUGGCAUUCUGUCCACCUCC	GGAGGUGGAAAGAAUCCCAA	Translation	[mRNA] locus=Scaffold000087:283665:292206:+	1
mir394_1	Bra037780	3	24.52	1	20	535	555	UUGGCAU-UCUGUCCACCUCC	GGAGGUGGGCAGAGAUGUCAA	Cleavage	[mRNA] locus=Scaffold000133:151225:152907:-	1
mir395_1	Bra033696	1.5	10.993	1	21	334	354	CUGAAGUGUUUGGGGGAACUC	GAGUUCCUCCAAACACUUCAU	Cleavage	[mRNA] locus=Scaffold000089:699560:701382:-	1
mir395_1	Bra035671	1.5	15.064	1	21	952	972	CUGAAGUGUUUGGGGGAACUC	GAGUGCCUCCAAACACUUCAG	Cleavage	[mRNA] locus=Scaffold000108:151862:156666:+	1
mir395_1	Bra009052	1.5	18.762	1	20	42	61	CUGAAGUGUUUGGGGGAACU	AGUUCUCCCAAACACUUCAA	Cleavage	[mRNA] locus=Scaffold000008:2236407:2239866:-	1
mir395_1	Bra028595	1.5	18.599	1	20	42	61	CUGAAGUGUUUGGGGGAACU	AGUUCUCCCAAACACUUCAA	Cleavage	[mRNA] locus=Scaffold000062:1221842:1228264:-	1
mir395_1	Bra033901	3	15.769	1	21	328	348	CUGAAGUGUUUGGGGGAACUC	GAGUUCCUCCAAACUCUUCAU	Cleavage	[mRNA] locus=Scaffold000091:734691:736748:-	1
mir395_1	Bra001891	3	18.268	1	21	325	345	CUGAAGUGUUUGGGGGAACUC	GAGUUCCUCCAAACUCUUCAU	Cleavage	[mRNA] locus=Scaffold000001:10395424:10397635:+	1
mir395_1	Bra014323	2.5	19.993	1	20	948	967	CUGAAGUGUUUGGGGGAACU	GGUUCCCCUUAACGCUUCAG	Translation	[mRNA] locus=Scaffold000015:3346194:3349735:-	1
mir395_1	Bra032866	2.5	20.695	1	20	923	942	CUGAAGUGUUUGGGGGAACU	AGUUUUCCAAAGCACUUCAG	Cleavage	[mRNA] locus=Scaffold000084:571936:574195:-	1
mir395_1	Bra002814	3	19.032	1	21	824	844	CUGAAGUGUUUGGGGGAACUC	GAGUUCCGACAAACGCUUCGG	Cleavage	[mRNA] locus=Scaffold000002:5390328:5392330:-	1
mir395_1	Bra028582	3	18.038	1	20	1674	1693	CUGAAGUGUUUGGGGGAACU	UGUUUCGCUAAACACUUCAG	Cleavage	[mRNA] locus=Scaffold000062:1151491:1154535:-	1
mir395_1	Bra032865	3	16.134	1	20	866	885	CUGAAGUGUUUGGGGGAACU	AGUUUUCUAAAGCACUUCAG	Cleavage	[mRNA] locus=Scaffold000084:560006:562284:-	1
mir395_2	Bra033696	2	10.993	1	21	334	354	CUGAAGUGUUUGGGGGGACUC	GAGUUCCUCCAAACACUUCAU	Cleavage	[mRNA] locus=Scaffold000089:699560:701382:-	1
mir395_2	Bra035671	1.5	15.064	1	21	952	972	CUGAAGUGUUUGGGGGGACUC	GAGUGCCUCCAAACACUUCAG	Cleavage	[mRNA] locus=Scaffold000108:151862:156666:+	1
mir395_2	Bra009052	2	18.762	1	20	42	61	CUGAAGUGUUUGGGGGGACU	AGUUCUCCCAAACACUUCAA	Cleavage	[mRNA] locus=Scaffold000008:2236407:2239866:-	1
mir395_2	Bra028595	2	18.599	1	20	42	61	CUGAAGUGUUUGGGGGGACU	AGUUCUCCCAAACACUUCAA	Cleavage	[mRNA] locus=Scaffold000062:1221842:1228264:-	1
mir395_2	Bra003456	3	14.842	1	20	966	985	CUGAAGUGUUUGGGGGGACU	AGUCUUCCCAGACACUACAG	Cleavage	[mRNA] locus=Scaffold000003:1835703:1839545:-	1
mir395_2	Bra014323	3	19.993	1	20	948	967	CUGAAGUGUUUGGGGGGACU	GGUUCCCCUUAACGCUUCAG	Translation	[mRNA] locus=Scaffold000015:3346194:3349735:-	1
mir395_2	Bra032866	3	20.695	1	20	923	942	CUGAAGUGUUUGGGGGGACU	AGUUUUCCAAAGCACUUCAG	Cleavage	[mRNA] locus=Scaffold000084:571936:574195:-	1
mir395_3	Bra033696	1	10.993	1	21	334	354	CUGAAGUGUUUGGAGGAACUC	GAGUUCCUCCAAACACUUCAU	Cleavage	[mRNA] locus=Scaffold000089:699560:701382:-	1
mir395_3	Bra035671	1	15.064	1	21	952	972	CUGAAGUGUUUGGAGGAACUC	GAGUGCCUCCAAACACUUCAG	Cleavage	[mRNA] locus=Scaffold000108:151862:156666:+	1
mir395_3	Bra033901	2.5	15.769	1	21	328	348	CUGAAGUGUUUGGAGGAACUC	GAGUUCCUCCAAACUCUUCAU	Cleavage	[mRNA] locus=Scaffold000091:734691:736748:-	1
mir395_3	Bra001891	2.5	18.268	1	21	325	345	CUGAAGUGUUUGGAGGAACUC	GAGUUCCUCCAAACUCUUCAU	Cleavage	[mRNA] locus=Scaffold000001:10395424:10397635:+	1
mir395_3	Bra036882	3	18.686	1	21	334	354	CUGAAGUGUUUGGAGGAACUC	GAGUUCCUUCAAACUCUUCAU	Cleavage	[mRNA] locus=Scaffold000122:184597:186330:-	1
mir395_3	Bra029753	3	19.533	1	21	548	568	CUGAAGUGUUUGGAGGAACUC	GAGUUCCUCCAAACAAUUCCG	Cleavage	[mRNA] locus=Scaffold000067:797326:801220:-	1
mir395_3	Bra033407	3	16.987	1	21	515	535	CUGAAGUGUUUGGAGGAACUC	GAGUUCCUUCAAAGGCUUCAA	Cleavage	[mRNA] locus=Scaffold000087:1028761:1030231:-	1
mir395_3	Bra006744	3	21.082	1	20	1017	1036	CUGAAGUGUUUGGAGGAACU	GGUUCCUCCGAAUACUUCGC	Cleavage	[mRNA] locus=Scaffold000005:4875633:4877149:-	1
mir395_3	Bra018264	3	13.682	1	20	999	1018	CUGAAGUGUUUGGAGGAACU	AGUUCCUUCAGACACUUUGA	Cleavage	[mRNA] locus=Scaffold000025:184002:186549:-	1
mir395_3	Bra009052	2.5	18.762	1	20	42	61	CUGAAGUGUUUGGAGGAACU	AGUUCUCCCAAACACUUCAA	Cleavage	[mRNA] locus=Scaffold000008:2236407:2239866:-	1
mir395_3	Bra028595	2.5	18.599	1	20	42	61	CUGAAGUGUUUGGAGGAACU	AGUUCUCCCAAACACUUCAA	Cleavage	[mRNA] locus=Scaffold000062:1221842:1228264:-	1
mir395_3	Bra011926	3	13.425	1	21	979	999	CUGAAGUGUUUGGAGGAACUC	GAGUGCCUCCAAAAACUUCAA	Cleavage	[mRNA] locus=Scaffold000012:183371:186723:+	1
mir395_3	Bra002814	3	19.032	1	21	824	844	CUGAAGUGUUUGGAGGAACUC	GAGUUCCGACAAACGCUUCGG	Cleavage	[mRNA] locus=Scaffold000002:5390328:5392330:-	1
mir396_1	Bra017393	2.5	16.058	1	21	1144	1164	GCUCAAGAAAGCUGUGGGAAA	UUUUCCACAGGUUUCUUGGGU	Translation	[mRNA] locus=Scaffold000022:582479:589561:+	1
mir396_1	Bra007061	3	17.279	1	20	894	913	GCUCAAGAAAGCUGUGGGAA	GUUCCACAGCUUUGUUGAGC	Cleavage	[mRNA] locus=Scaffold000006:1196276:1207908:+	1
mir396_1	Bra028420	3	22.532	1	20	209	228	GCUCAAGAAAGCUGUGGGAA	UUCUCAUGGCUUUCUUGACC	Cleavage	[mRNA] locus=Scaffold000062:211950:213513:+	1
mir396_1	Bra014071	3	22.011	1	20	221	240	GCUCAAGAAAGCUGUGGGAA	UUCUCAUGGCUUUCUUGACC	Cleavage	[mRNA] locus=Scaffold000015:1144555:1146185:-	1
mir396_1	Bra036198	2.5	23.218	1	20	230	249	GCUCAAGAAAGCUGUGGGAA	UUGUCAUGGCUUUCUUGAGC	Cleavage	[mRNA] locus=Scaffold000113:473847:475980:+	1
mir396_1	Bra039693	3	18.144	1	20	231	250	GCUCAAGAAAGCUGUGGGAA	UUUGUACAUCUUUCUUGAGC	Cleavage	[mRNA] locus=Scaffold000173:227733:229680:+	1
mir396_1	Bra029427	3	14.179	1	20	485	504	GCUCAAGAAAGCUGUGGGAA	UUCUGAUAGAUUUCUUGAGC	Translation	[mRNA] locus=Scaffold000066:85002:85943:-	1
mir397_1	Bra020269	0.5	17.735	1	20	667	686	UCAUUGAGUGCAGCGUUGAU	AUCAACGCUGCACUUAAUGA	Cleavage	[mRNA] locus=Scaffold000030:1220938:1222965:-	1
mir397_1	Bra028844	1.5	11.118	1	21	678	698	UCAUUGAGUGCAGCGUUGAUG	CAUCAACGCUGCACUAAAUGA	Cleavage	[mRNA] locus=Scaffold000063:988168:990431:+	1
mir397_1	Bra018408	1	8.831	1	20	682	701	UCAUUGAGUGCAGCGUUGAU	AUCAAUGCUGCACUCGAUGA	Cleavage	[mRNA] locus=Scaffold000025:1201928:1204178:+	1
mir397_1	Bra017139	1.5	11.804	1	20	673	692	UCAUUGAGUGCAGCGUUGAU	GUCAAUGCUGCACUUAAUGA	Cleavage	[mRNA] locus=Scaffold000021:1534810:1537799:-	1
mir397_1	Bra005140	1.5	13.551	1	20	670	689	UCAUUGAGUGCAGCGUUGAU	GUCAAUGCUGCACUUAAUGA	Cleavage	[mRNA] locus=Scaffold000004:3679277:3682262:-	1
mir397_1	Bra011325	3	12.478	1	22	656	677	UCAUUGAGUGCAGCGUUGAUGU	AUAUCAAUGUUGUCCUCAAUGG	Translation	[mRNA] locus=Scaffold000011:1643156:1647216:-	1
mir397_1	Bra011537	2.5	24.09	1	22	460	481	UCAUUGAGUGCAGCGUUGAUGU	GUGUCGACGGUGCACUCGAUGA	Cleavage	[mRNA] locus=Scaffold000011:2584959:2589082:-	1
mir397_1	Bra015817	3	19.603	1	22	2216	2237	UCAUUGAGUGCAGCGUUGAUGU	GUAUUGAUGCUGCGUUCGAUGA	Cleavage	[mRNA] locus=Scaffold000019:1000193:1005028:-	1
mir397_1	Bra002515	2.5	12.823	1	20	670	689	UCAUUGAGUGCAGCGUUGAU	AUCAACGCUGCGCUUAACGA	Cleavage	[mRNA] locus=Scaffold000002:3685209:3687485:-	1
mir397_1	Bra015005	3	14.92	1	22	322	343	UCAUUGAGUGCAGCGUUGAUGU	AGAUCAAUGUUGGAUUCAGUGA	Translation	[mRNA] locus=Scaffold000017:1367828:1368379:+	1
mir397_1	Bra035252	2.5	22.654	1	20	671	690	UGCCAAAGGAGAGUUGCCCU	CGGGCAACACUCCUUUGGCG	Cleavage	[mRNA] locus=Scaffold000102:486762:491190:-	1
mir399_1	Bra008753	3	21.309	1	21	832	852	UGCCAAAGGAGAGUUGCCCUG	CAGGGCGACACGCUUUUGGCA	Translation	[mRNA] locus=Scaffold000008:918090:919653:-	1
mir399_1	Bra032185	3	17.603	1	21	177	197	UGCCAAAGGAGAGUUGCCCUG	CAGUGCAGAUCUCCUUUGGCG	Cleavage	[mRNA] locus=Scaffold000079:1150083:1154958:+	1
mir399_1	Bra035805	3	13.727	1	21	634	654	UGCCAAAGGAGAGUUGCCCUG	UAUGGAAAGUCUCCUUUGGCA	Cleavage	[mRNA] locus=Scaffold000109:465646:468598:-	1
mir399_2	Bra035252	3	22.654	1	21	670	690	UGCCAAAGGAGAUUUGUCCGG	UCGGGCAACACUCCUUUGGCG	Cleavage	[mRNA] locus=Scaffold000102:486762:491190:-	1
mir399_3	Bra032185	3	17.603	1	21	177	197	UGCCAAAGGAGAUUUGCCCGG	CAGUGCAGAUCUCCUUUGGCG	Cleavage	[mRNA] locus=Scaffold000079:1150083:1154958:+	1
mir399_3	Bra035252	2.5	22.654	1	21	670	690	UGCCAAAGGAGAUUUGCCCGG	UCGGGCAACACUCCUUUGGCG	Cleavage	[mRNA] locus=Scaffold000102:486762:491190:-	1
mir403_1	Bra021148	3	23.995	1	21	990	1010	UUAGAUUCACGCACAAACUCG	UGAGAUUGAGCGUGAAUUUGA	Cleavage	[mRNA] locus=Scaffold000033:526572:531267:-	1
mir403_1	Bra000114	3	21.619	1	20	7758	7777	UUAGAUUCACGCACAAACUC	GGAUUUGUGCAUGAAUCUAG	Translation	[mRNA] locus=Scaffold000001:543085:557856:-	1
mir828_1	Bra022602	3	16.804	1	22	322	343	UCUUGCUUAAAUGAGUAUUCCA	UGGAAUACCCAUUUGAACAAGA	Cleavage	[mRNA] locus=Scaffold000038:1006604:1007365:-	1
mir828_1	Bra029113	3	13.444	1	22	322	343	UCUUGCUUAAAUGAGUAUUCCA	UGGAAUACACAUUUGAACAAGA	Cleavage	[mRNA] locus=Scaffold000064:997217:997892:+	1
mir828_1	Bra028550	3	15.974	1	22	313	334	UCUUGCUUAAAUGAGUAUUCCA	UGGAGGACUCAUUUAAGAAAGA	Cleavage	[mRNA] locus=Scaffold000062:1028124:1029134:-	1
mir828_1	Bra004162	3	16.874	1	22	310	331	UCUUGCUUAAAUGAGUAUUCCA	UGGAACACCCAUUUGAGUAAGA	Cleavage	[mRNA] locus=Scaffold000003:5695735:5700990:+	1
mir828_1	Bra039763	3	10.13	1	22	310	331	UCUUGCUUAAAUGAGUAUUCCA	UGGAACACCCAUUUGAGUAAGA	Cleavage	[mRNA] locus=Scaffold000175:231314:233043:+	1
mir828_1	Bra025589	3	17.717	1	22	397	418	UCUUGCUUAAAUGAGUAUUCCA	UGGAACACUCAUCUUAGCAAGA	Translation	[mRNA] locus=Scaffold000048:1173940:1176688:-	1
mir828_1	Bra014237	3	13.039	1	20	1852	1871	UCUUGCUUAAAUGAGUAUUC	GAAGACUUGUUUGAGCGAGA	Cleavage	[mRNA] locus=Scaffold000015:2680918:2682918:+	1
mir845_1	Bra022097	2	21.314	1	21	59	79	CGGCUCUGAUACCAAUUGAUG	CAUCAGGUGGUAUCAGAGCUG	Cleavage	[mRNA] locus=Scaffold000036:1530997:1531524:+	1
mir845_1	Bra010150	2	24.362	1	20	310	329	CGGCUCUGAUACCAAUUGAU	UUCAAUUGGUAUCAGAGCCA	Cleavage	[mRNA] locus=Scaffold000009:3816396:3818721:-	1
mir845_1	Bra027045	2	23.967	1	21	512	532	CGGCUCUGAUACCAAUUGAUG	CAUCAGGUGGUAUCAGAGCUG	Cleavage	[mRNA] locus=Scaffold000054:467499:468942:-	1
mir845_1	Bra008408	3	17.388	1	20	1214	1233	CGGCUCUGAUACCAAUUGAU	UACAAUUGGUAUUAGAGCUG	Cleavage	[mRNA] locus=Scaffold000007:4032750:4034309:-	1
mir845_1	Bra033889	3	16.454	1	21	10	30	CGGCUCUGAUACCAAUUGAUG	CAUCGAUUAGUUUCAGAGCUG	Translation	[mRNA] locus=Scaffold000091:585590:586525:+	1
mir845_1	Bra011372	3	16.27	1	21	4094	4114	CGGCUCUGAUACCAAUUGAUG	UAUCAUUUGGUGUUAGGGCUG	Cleavage	[mRNA] locus=Scaffold000011:1870788:1882963:+	1
mir845_1	Bra014754	3	13.48	1	21	159	179	CGGCUCUGAUACCAAUUGAUG	UAACAAGUGGUAUCAGAGCCA	Cleavage	[mRNA] locus=Scaffold000016:2609911:2611935:-	1
mir858_1	Bra035604	2	18.914	1	21	289	309	UUCGUUGUCUGUUCGACCUUG	CCAGGUCGAACAGACAACGAU	Cleavage	[mRNA] locus=Scaffold000107:298394:300040:+	1
mir858_1	Bra022267	2.5	12.904	1	21	504	524	UUCGUUGUCUGUUCGACCUUG	CAAGGUUGAACAGACGAAGAA	Cleavage	[mRNA] locus=Scaffold000037:713038:714958:-	1
mir858_1	Bra002847	3	19.417	1	20	290	309	UUCGUUGUCUGUUCGACCUU	CUGGUCGAACAGACAACGAU	Cleavage	[mRNA] locus=Scaffold000002:5614843:5616319:-	1
mir858_1	Bra026985	2.5	18.456	1	21	574	594	UUCGUUGUCUGUUCGACCUUG	CAAUGUCUAACAGACAAUGAA	Cleavage	[mRNA] locus=Scaffold000053:1476258:1479961:-	1
mir858_1	Bra024103	2.5	20.495	1	21	6	26	UUCGUUGUCUGUUCGACCUUG	CAACGUUGAAGAGACAACGAA	Translation	[mRNA] locus=Scaffold000043:1056871:1060007:-	1
mir858_1	Bra026048	2.5	14.687	1	21	295	315	UUCGUUGUCUGUUCGACCUUG	CCAGGACGAACAGACAACGAG	Cleavage	[mRNA] locus=Scaffold000050:789748:790780:+	1
mir858_1	Bra035532	2.5	16.798	1	21	298	318	UUCGUUGUCUGUUCGACCUUG	CCAGGGCGAACAGACAAUGAA	Cleavage	[mRNA] locus=Scaffold000106:675490:676436:-	1
mir858_1	Bra002533	3	11.185	1	21	277	297	UUCGUUGUCUGUUCGACCUUG	CCGGGUCGAACAGAUAAUGAG	Cleavage	[mRNA] locus=Scaffold000002:3781871:3782814:+	1
mir858_1	Bra029113	2.5	19.834	1	21	289	309	UUCGUUGUCUGUUCGACCUUG	CCAGGUCGGACUGACAACGAA	Translation	[mRNA] locus=Scaffold000064:997217:997892:+	1
mir858_1	Bra024368	3	12.182	1	21	295	315	UUCGUUGUCUGUUCGACCUUG	CAAGGAAGAACAGAUAACGAG	Cleavage	[mRNA] locus=Scaffold000044:795297:796430:+	1
mir858_1	Bra020837	3	14.804	1	21	289	309	UUCGUUGUCUGUUCGACCUUG	CGAGGAAGAACAGAUAACGAA	Cleavage	[mRNA] locus=Scaffold000032:267280:268511:+	1
mir858_1	Bra025410	3	10.752	1	21	331	351	UUCGUUGUCUGUUCGACCUUG	CCAGGACGAACAGAUAAUGAA	Cleavage	[mRNA] locus=Scaffold000047:1662719:1664342:+	1
mir858_1	Bra017781	3	15.881	1	21	120	140	UUCGUUGUCUGUUCGACCUUG	CGAGGACGAUCAGACGACGAA	Cleavage	[mRNA] locus=Scaffold000023:1218584:1219878:+	1
mir858_1	Bra020744	3	4.688	1	21	340	360	UUCGUUGUCUGUUCGACCUUG	CCAGGACGAACAGAUAAUGAA	Cleavage	[mRNA] locus=Scaffold000031:1886279:1889941:-	1
