# Supplementary material for: A Genome-Wide Perspective of miRNAome in Response to High Temperature, Salinity and Drought Stresses in Brassica juncea (Czern) L
Source: PLoS One. 2014 Mar 26;9(3):e92456. doi: 10.1371/journal.pone.0092456 (PMC3966790; doi:10.1371/journal.pone.0092456)
Supplement: Table S11 — Putative targets of true novel and candidate novel miRNAs predicted in B. rapa . (XLSX) [file pone.0092456.s015.xlsx]

## Sheet: Table S11
Table S11: Putative targets of true novel and candidate novel miRNAs predited in B. rapa.
miRNA_ID		Target_Acc.	Expectation	UPE	miRNA_start	miRNA_end	Target_start	Target_end	miRNA_aligned_fragment	Target_aligned_fragment	Inhibition	Target_Desc.	multiplicity
Bju-N1	1	Bra025084	3	21.818	1	20	603	622	UCGCUUGGUGCAGGUCGGGA	UCCCGCCUUGUAUCAAGUGA	Cleavage	[mRNA] locus=Scaffold000046:1686865:1688665:+	1
Bju-N1	2	Bra014136	3	17.936	1	20	438	457	UCGCUUGGUGCAGGUCGGGA	UCCCGAGCUGCAUCAAGCUA	Cleavage	[mRNA] locus=Scaffold000015:1783057:1788210:-	1
Bju-N1	3	Bra032254	3	15.424	1	20	525	544	UCGCUUGGUGCAGGUCGGGA	UCCCGAGCUGCAUCAAGCUA	Cleavage	[mRNA] locus=Scaffold000080:814194:819848:-	1
Bju-N1	4	Bra013438	3	20.427	1	20	558	577	UCGCUUGGUGCAGGUCGGGA	UCACGAUUUUCACCAAGCGA	Translation	[mRNA] locus=Scaffold000014:1116843:1117463:+	1
Bju-N2	1	Bra027656	3	21.692	1	21	831	851	UUUCCAAAUGUAGACAAAGCA	UGCUCUGUCUACGUUUGGUAA	Cleavage	[mRNA] locus=Scaffold000057:322783:327040:-	1
Bju-N2	2	Bra032162	2.5	22.478	1	20	112	131	UUUCCAAAUGUAGACAAAGC	GCUUCGUUUAUAUUUGGAGA	Cleavage	[mRNA] locus=Scaffold000079:937050:938659:-	1
Bju-N2	3	Bra039205	2.5	22.238	1	20	142	161	UUUCCAAAUGUAGACAAAGC	GCUUCGUUUAUAUUUGGAGA	Cleavage	[mRNA] locus=Scaffold000161:129137:130700:+	1
Bju-N2	4	Bra026882	3	17.295	1	21	189	209	UUUCCAAAUGUAGACAAAGCA	UGCUUUUUCUGUUUUUGGAAA	Translation	[mRNA] locus=Scaffold000053:942948:944652:+	1
Bju-N2	5	Bra028267	3	17.266	1	21	396	416	UUUCCAAAUGUAGACAAAGCA	UGCUUUUUCUGUUUUUGGAAA	Translation	[mRNA] locus=Scaffold000061:163371:165251:+	1
Bju-N2	6	Bra040044	3	21.406	1	20	339	358	UUUCCAAAUGUAGACAAAGC	GAUUUGUCUAUAUUUGGAGC	Cleavage	[mRNA] locus=Scaffold000186:116594:117471:+	1
Bju-N2	7	Bra018867	3	12.428	1	20	373	392	UUUCCAAAUGUAGACAAAGC	GCUUUGUCUCCAUUUGAAGA	Translation	[mRNA] locus=Scaffold000026:1664621:1666032:-	1
Bju-N2	8	Bra025218	3	18.521	1	20	676	695	UUUCCAAAUGUAGACAAAGC	GCUUUGUCUCUGUUUGGGGA	Translation	[mRNA] locus=Scaffold000047:670523:671554:-	1
Bju-N2	9	Bra004525	3	20.045	1	20	877	896	UUUCCAAAUGUAGACAAAGC	GUUUUGUUUCCAUUUGGGGA	Translation	[mRNA] locus=Scaffold000004:617912:618970:-	1
Bju-N2	10	Bra030707	3	16.065	1	20	1626	1645	UUUCCAAAUGUAGACAAAGC	GCUGUGUUUACAUUUUGAAA	Cleavage	[mRNA] locus=Scaffold000072:881893:884986:+	1
Bju-N2	11	Bra008625	2.5	24.612	1	20	3121	3140	UUUCCAAAUGUAGACAAAGC	GCUAUGUCGACAUUUGGAGA	Cleavage	[mRNA] locus=Scaffold000008:331881:335823:-	1
Bju-N2	12	Bra014326	3	17.749	1	20	1585	1604	UUUCCAAAUGUAGACAAAGC	ACUUUGUCAAGAUUUGGAAA	Translation	[mRNA] locus=Scaffold000015:3387911:3391115:+	1
Bju-N2	13	Bra018662	3	18.707	1	20	3123	3142	UUUCCAAAUGUAGACAAAGC	GCUGUGUCUACUUUUGGAGG	Translation	[mRNA] locus=Scaffold000026:442266:451263:+	1
Bju-N3	1	Bra010589	0	12.669	1	20	977	996	UUGUGUUGUGAUGAUAAUCC	GGAUUAUCAUCACAACACAA	Cleavage	[mRNA] locus=Scaffold000010:2138179:2141717:+	1
Bju-N3	2	Bra019409	1	16.936	1	20	1121	1140	UUGUGUUGUGAUGAUAAUCC	GGAUUAUUGUCACAACACAA	Cleavage	[mRNA] locus=Scaffold000027:2377642:2382367:+	1
Bju-N3	3	Bra029443	1	15.832	1	20	38	57	UUGUGUUGUGAUGAUAAUCC	GGAUUCUCAUCACAACACAA	Cleavage	[mRNA] locus=Scaffold000066:214360:216965:-	1
Bju-N3	4	Bra017807	1	10.452	1	20	1118	1137	UUGUGUUGUGAUGAUAAUCC	GAAUUAUCAUCACAACACAA	Cleavage	[mRNA] locus=Scaffold000023:1369463:1373723:+	1
Bju-N3	5	Bra006095	1	17.324	1	20	446	465	UUGUGUUGUGAUGAUAAUCC	GGAUUAUAAUCACAACACAA	Cleavage	[mRNA] locus=Scaffold000005:1966710:1969885:-	1
Bju-N3	6	Bra010590	1	12.728	1	20	1028	1047	UUGUGUUGUGAUGAUAAUCC	GAAUUAUCAUCACAACACAA	Cleavage	[mRNA] locus=Scaffold000010:2144325:2148423:+	1
Bju-N3	7	Bra038872	1.5	21.891	1	20	1109	1128	UUGUGUUGUGAUGAUAAUCC	GGAUUAUCAUUACGACGCAA	Cleavage	[mRNA] locus=Scaffold000154:111827:115481:+	1
Bju-N3	8	Bra006146	1	18.716	1	20	1181	1200	UUGUGUUGUGAUGAUAAUCC	GGAUUAUAAUCACAACACAA	Cleavage	[mRNA] locus=Scaffold000005:2217593:2221273:+	1
Bju-N3	9	Bra006094	1	15.142	1	20	1106	1125	UUGUGUUGUGAUGAUAAUCC	GGAUUAUAAUCACAACACAA	Cleavage	[mRNA] locus=Scaffold000005:1961507:1965536:-	1
Bju-N3	10	Bra010588	1.5	17.673	1	20	632	651	UUGUGUUGUGAUGAUAAUCC	GGAUUAUCAUCACAACCCAA	Cleavage	[mRNA] locus=Scaffold000010:2128423:2137179:+	2
Bju-N3	11	Bra010588	1.5	17.296	1	20	3608	3627	UUGUGUUGUGAUGAUAAUCC	GGAUUAUCAUCACAACCCAA	Cleavage	[mRNA] locus=Scaffold000010:2128423:2137179:+	2
Bju-N3	12	Bra020861	1.5	16.104	1	20	3077	3096	UUGUGUUGUGAUGAUAAUCC	GGAUUAUCGUCACGACGCAA	Cleavage	[mRNA] locus=Scaffold000032:423921:439726:+	1
Bju-N3	13	Bra040208	2	14.626	1	20	479	498	UUGUGUUGUGAUGAUAAUCC	GGAUUAUCAUCACAACAAAG	Cleavage	[mRNA] locus=Scaffold000191:113021:118210:+	1
Bju-N3	14	Bra010663	1.5	18.854	1	20	989	1008	UUGUGUUGUGAUGAUAAUCC	GGAUUAUAAUCACAACACAG	Cleavage	[mRNA] locus=Scaffold000010:2643158:2648829:+	1
Bju-N3	15	Bra006556	1.5	15.585	1	20	1142	1161	UUGUGUUGUGAUGAUAAUCC	GGAUUAUAAUCACAGCACAA	Cleavage	[mRNA] locus=Scaffold000005:4031310:4035457:+	1
Bju-N3	16	Bra027510	1.5	15.576	1	20	1376	1395	UUGUGUUGUGAUGAUAAUCC	GGAUUAUUAUAACAACACAA	Translation	[mRNA] locus=Scaffold000056:605261:610632:+	1
Bju-N3	17	Bra004045	3	12.225	1	20	434	453	UUGUGUUGUGAUGAUAAUCC	AGAUUGUCAUUACAAUACAG	Cleavage	[mRNA] locus=Scaffold000003:5054548:5060128:-	1
Bju-N3	18	Bra001160	3	16.524	1	20	977	996	UUGUGUUGUGAUGAUAAUCC	UGAUUAUCAUUACAACAGAA	Cleavage	[mRNA] locus=Scaffold000001:6249148:6252998:-	1
Bju-N3	19	Bra039560	3	18.703	1	20	860	879	UUGUGUUGUGAUGAUAAUCC	GGAUUAUCAUCACAACGAAU	Cleavage	[mRNA] locus=Scaffold000168:179588:189123:+	1
Bju-N3	20	Bra023060	2	16.955	1	20	611	630	UUGUGUUGUGAUGAUAAUCC	GGAUAAACAUCACAACACAA	Cleavage	[mRNA] locus=Scaffold000039:1652276:1654138:-	1
Bju-N3	21	Bra019410	2	18.602	1	20	1172	1191	UUGUGUUGUGAUGAUAAUCC	GGAUAAUAAUCACAACACAA	Cleavage	[mRNA] locus=Scaffold000027:2384781:2390142:+	1
Bju-N3	22	Bra010496	2.5	20.65	1	20	1202	1221	UUGUGUUGUGAUGAUAAUCC	GGAUUAUAAUCACAUCACAA	Cleavage	[mRNA] locus=Scaffold000010:1605577:1609744:+	1
Bju-N3	23	Bra040210	3	21.667	1	20	962	981	UUGUGUUGUGAUGAUAAUCC	GGAUUGUCAUCACGACAAAG	Cleavage	[mRNA] locus=Scaffold000191:123505:128171:+	1
Bju-N4	1	Bra034573	3	20.076	1	21	514	534	ACAGGGAACAAGCAGAGCAUG	CAUGCUUUUCAUGUUCCUUGU	Translation	[mRNA] locus=Scaffold000097:252812:257008:+	1
Bju-N4	2	Bra028104	3	11.377	1	20	77	96	ACAGGGAACAAGCAGAGCAU	UUGUUCUACUUGUUCUCUGU	Cleavage	[mRNA] locus=Scaffold000060:22562:24453:+	1
Bju-N4	3	Bra027667	3	17.022	1	20	914	933	ACAGGGAACAAGCAGAGCAU	AUGCUGUGUUUGUUCCGUGU	Cleavage	[mRNA] locus=Scaffold000057:376245:378119:+	1
Bju-N4	4	Bra024198	2.5	13.678	1	20	457	476	ACAGGGAACAAGCAGAGCAU	AUCCGUUGCUUGUUCCCUGU	Cleavage	[mRNA] locus=Scaffold000043:1734939:1735819:+	1
Bju-N5	1	Bra026884	2.5	20.259	1	21	1004	1024	AUAAAUCCCAAGCAUCAUCCA	UCGAUGAUGCUUGGGAUCUAU	Cleavage	[mRNA] locus=Scaffold000053:960735:962114:+	1
Bju-N5	2	Bra026836	2.5	17.588	1	21	1133	1153	AUAAAUCCCAAGCAUCAUCCA	UCGAUGAUGCUUGGGAUCUAU	Cleavage	[mRNA] locus=Scaffold000053:778745:780506:+	1
Bju-N5	3	Bra031731	2.5	16.85	1	21	1148	1168	AUAAAUCCCAAGCAUCAUCCA	UAGAUGAUGCUUGGGAUCUAU	Cleavage	[mRNA] locus=Scaffold000077:937320:939117:+	1
Bju-N5	4	Bra026954	2.5	22.432	1	21	1577	1597	AUAAAUCCCAAGCAUCAUCCA	UCGAUGAUGCUUGGGAUCUAU	Cleavage	[mRNA] locus=Scaffold000053:1317681:1319633:-	1
Bju-N5	5	Bra016758	2.5	17.043	1	21	3131	3151	AUAAAUCCCAAGCAUCAUCCA	UCGAUGAUGCUUGGGAGUUAU	Cleavage	[mRNA] locus=Scaffold000020:2195350:2199257:-	1
Bju-N5	6	Bra036649	3	16.848	1	21	1013	1033	AUAAAUCCCAAGCAUCAUCCA	UGGAAGAUGCUUGGGACUUGU	Cleavage	[mRNA] locus=Scaffold000119:93943:95118:-	1
Bju-N5	7	Bra026882	3	18.46	1	21	1226	1246	AUAAAUCCCAAGCAUCAUCCA	UCGAUGGUGCUUGGGAUCUAU	Cleavage	[mRNA] locus=Scaffold000053:942948:944652:+	1
Bju-N5	8	Bra028874	3	18.423	1	21	1469	1489	AUAAAUCCCAAGCAUCAUCCA	UGGAUGAUGUUUUGGACUUAU	Translation	[mRNA] locus=Scaffold000063:1105586:1108730:-	1
Bju-N5	9	Bra023420	2.5	16.222	1	20	467	486	AUAAAUCCCAAGCAUCAUCC	GGGAGAUGUUUGGGAUUUGU	Cleavage	[mRNA] locus=Scaffold000041:532124:536145:-	1
Bju-N5	10	Bra030615	3	21.606	1	20	114	133	AUAAAUCCCAAGCAUCAUCC	GGAUGAUGCUUUGGGUUUGG	Translation	[mRNA] locus=Scaffold000072:521789:523198:-	1
Bju-N5	11	Bra002495	3	20.249	1	20	930	949	AUAAAUCCCAAGCAUCAUCC	GAAUGAUGCUUGGGACUUGU	Cleavage	[mRNA] locus=Scaffold000002:3563226:3565865:-	1
Bju-N6	1	Bra038579	2	20.481	1	22	1879	1900	UUUCAUCUUAGAGAAUGUUGUU	AGCAACAUUCUCUUGGAUGAGA	Translation	[mRNA] locus=Scaffold000149:210990:213970:-	1
Bju-N6	2	Bra013684	2	16.143	1	22	3112	3133	UUUCAUCUUAGAGAAUGUUGUU	GGUAACAUUCUCUUAGAUGAAG	Translation	[mRNA] locus=Scaffold000014:2571974:2578703:-	1
Bju-N6	3	Bra029425	3	17.533	1	22	160	181	UUUCAUCUUAGAGAAUGUUGUU	AGUAACAUUCUUUUGGAUGAAG	Translation	[mRNA] locus=Scaffold000066:75732:76871:+	1
Bju-N6	4	Bra007786	3	23.2	1	22	1384	1405	UUUCAUCUUAGAGAAUGUUGUU	AGCAACAUUCUCUUGGACGAAA	Translation	[mRNA] locus=Scaffold000006:4967143:4969113:-	1
Bju-N6	5	Bra013678	3	23.327	1	22	1414	1435	UUUCAUCUUAGAGAAUGUUGUU	AGUAACAUUCUCUUAGAUGGGG	Translation	[mRNA] locus=Scaffold000014:2524760:2527276:+	1
Bju-N6	6	Bra031433	3	16.492	1	22	1861	1882	UUUCAUCUUAGAGAAUGUUGUU	AGCAAUAUUCUUUUGGAUGAGA	Translation	[mRNA] locus=Scaffold000076:409271:412224:+	1
Bju-N6	7	Bra034257	3	14.902	1	22	1870	1891	UUUCAUCUUAGAGAAUGUUGUU	AGCAACAUUCUCUUGGACGAAA	Translation	[mRNA] locus=Scaffold000094:65431:68504:-	1
Bju-N6	8	Bra027298	3	19.167	1	22	327	348	UUUCAUCUUAGAGAAUGUUGUU	GAAGACAUUGUCUGAGAUGAAA	Cleavage	[mRNA] locus=Scaffold000055:712947:714239:-	1
Bju-N6	9	Bra023019	3	9.435	1	22	1045	1066	UUUCAUCUUAGAGAAUGUUGUU	AAAAACAUACUCUAUGAUGAAA	Cleavage	[mRNA] locus=Scaffold000039:1461313:1463172:-	1
Bju-N6	10	Bra031765	3	16.283	1	22	1945	1966	UUUCAUCUUAGAGAAUGUUGUU	AGCAACAUUUUGUUAGAUGAGA	Translation	[mRNA] locus=Scaffold000077:1112968:1115943:+	1
Bju-N6	11	Bra026610	3	19.654	1	22	2395	2416	UUUCAUCUUAGAGAAUGUUGUU	AGCAACAUUCUUCUAGAUGAGA	Translation	[mRNA] locus=Scaffold000052:913368:916199:+	1
Bju-N6	12	Bra008427	2.5	21.778	1	22	3766	3787	UUUCAUCUUAGAGAAUGUUGUU	ACCAACAUUCUUUUGGAUGAGA	Translation	[mRNA] locus=Scaffold000007:4196389:4204465:-	1
Bju-N6	13	Bra018650	3	18.126	1	20	2063	2082	UUUCAUCUUAGAGAAUGUUG	CAACAUUUUCUGAAAUGAAG	Cleavage	[mRNA] locus=Scaffold000026:381184:383970:+	1
Bju-N6	14	Bra028939	2.5	18.905	1	20	557	577	UUUCAUC-UUAGAGAAUGUUG	CAACAUUCUCUAAUGAUGAAG	Cleavage	[mRNA] locus=Scaffold000064:87806:89314:-	1
Bju-N7	1	Bra034236	2.5	18.809	1	21	1351	1371	UGGGGUUGUGAUUUCAGGCUU	AAGCAUGGAGUCACAACUCCA	Cleavage	[mRNA] locus=Scaffold000093:908334:911821:-	1
Bju-N7	2	Bra012217	3	14.512	1	21	451	471	UGGGGUUGUGAUUUCAGGCUU	AAGCCUGAUAUUGCAGCUCCA	Cleavage	[mRNA] locus=Scaffold000012:2189123:2192642:-	1
Bju-N7	3	Bra033749	3	20.761	1	21	1558	1578	UGGGGUUGUGAUUUCAGGCUU	AUGCCUGGAAUCAUAAUUCCA	Cleavage	[mRNA] locus=Scaffold000089:998534:1001851:+	1
Bju-N7	4	Bra024884	3	20.068	1	21	1912	1932	UGGGGUUGUGAUUUCAGGCUU	AAGCCUGAUAUUACGGCUCCA	Cleavage	[mRNA] locus=Scaffold000046:708718:713445:-	1
Bju-N7	5	Bra040380	3	9.649	1	21	105	125	UGGGGUUGUGAUUUCAGGCUU	AAGCUUAAAAUCCCAACUCCA	Translation	[mRNA] locus=Scaffold000200:110679:111386:-	1
Bju-N7	6	Bra036923	3	17.318	1	21	1246	1266	UGGGGUUGUGAUUUCAGGCUU	AAGCCUGAUAUAACAGCUCCA	Translation	[mRNA] locus=Scaffold000122:534311:539201:-	1
Bju-N7	7	Bra032016	3	18.503	1	21	1144	1164	UGGGGUUGUGAUUUCAGGCUU	GAACCUGAGAUCACAACACCA	Cleavage	[mRNA] locus=Scaffold000078:1192205:1198728:-	1
Bju-N7	8	Bra028958	3	18.1	1	21	3194	3214	UGGGGUUGUGAUUUCAGGCUU	AAGCCGCAAGUCACAACCUCA	Cleavage	[mRNA] locus=Scaffold000064:176243:183674:-	1
Bju-N7	9	Bra033243	3	15.755	1	21	1456	1477	UGGGGUUGUGAUU-UCAGGCUU	AGGCUUGAGAAUCACAACCUCA	Cleavage	[mRNA] locus=Scaffold000087:148259:151299:+	1
Bju-N8	1	Bra015704	2.5	22.98	1	20	519	538	UGAAGCUGCCAGCAUGAUCU	AGAUGAUGCUGCUAGCUUCA	Translation	[mRNA] locus=Scaffold000019:429218:431361:+	1
Bju-N8	2	Bra007672	3	17.384	1	20	398	417	UGAAGCUGCCAGCAUGAUCU	AGAUUAAGCUCGCAGUUUCA	Translation	[mRNA] locus=Scaffold000006:4442315:4442882:-	1
Bju-N8	3	Bra037737	3	19.087	1	20	542	561	UGAAGCUGCCAGCAUGAUCU	AGAUCAUUAUGGCAGUUUUA	Cleavage	[mRNA] locus=Scaffold000132:448228:450907:+	1
Bju-N8	4	Bra032584	3	17.099	1	20	987	1006	UGAAGCUGCCAGCAUGAUCU	AGAGCAUGCUGAUAGUUUCA	Translation	[mRNA] locus=Scaffold000082:771695:776402:+	1
Bju-N8	5	Bra002277	3	18.326	1	20	933	953	UGAAGCUGCCA-GCAUGAUCU	AGAUCUUGCCUGGCAGCUUCA	Cleavage	[mRNA] locus=Scaffold000002:2248710:2250811:-	1
Bju-N9	1	Bra040648	2	14.708	1	20	1333	1352	UCGGGAAGAUUAUGAGAGCA	UUCUCUCAUAAUCUUCUUGA	Cleavage	[mRNA] locus=Scaffold000229:46752:50230:-	1
Bju-N9	2	Bra003278	3	23.723	1	20	129	148	UCGGGAAGAUUAUGAGAGCA	UGCUCUCAUCAUCUUCUCCA	Translation	[mRNA] locus=Scaffold000003:891085:891270:+	1
Bju-N9	3	Bra010955	3	19.721	1	20	129	148	UCGGGAAGAUUAUGAGAGCA	UGCUCUCAUCAUCUUCUCUA	Translation	[mRNA] locus=Scaffold000010:4043439:4045518:-	1
Bju-N9	4	Bra006322	3	15.465	1	20	129	148	UCGGGAAGAUUAUGAGAGCA	UGCUCUCAUCAUCUUCUCCA	Translation	[mRNA] locus=Scaffold000005:3000325:3002505:-	1
Bju-N9	5	Bra030032	3	20.997	1	20	129	148	UCGGGAAGAUUAUGAGAGCA	UGCUCUCAUCAUCUUCUCUA	Translation	[mRNA] locus=Scaffold000069:59297:61304:+	1
Bju-N9	6	Bra032814	3	18.314	1	20	129	148	UCGGGAAGAUUAUGAGAGCA	UGCUCUCAUCAUCUUCUCUA	Translation	[mRNA] locus=Scaffold000084:254055:256242:+	1
Bju-N9	7	Bra035264	3	9.75	1	20	33	52	UCGGGAAGAUUAUGAGAGCA	UGCUCUGAUAAUCUCCUCGA	Cleavage	[mRNA] locus=Scaffold000102:578120:579911:+	1
Bju-N11	1	Bra026682	0	23.177	1	22	537	558	UCCACCCAUACCAUACAGACCC	GGGUCUGUAUGGUAUGGGUGGA	Cleavage	[mRNA] locus=Scaffold000053:47288:49887:+	1
Bju-N11	2	Bra036045	0.5	17.786	1	22	537	558	UCCACCCAUACCAUACAGACCC	GGGUUUGUAUGGUAUGGGUGGA	Cleavage	[mRNA] locus=Scaffold000112:223287:224691:+	1
Bju-N11	3	Bra015597	2	19.922	1	22	513	534	UCCACCCAUACCAUACAGACCC	GGGUAUGUAUGGCAUGGGUGGA	Translation	[mRNA] locus=Scaffold000018:3014667:3017311:+	1
Bju-N11	4	Bra016781	2	18.244	1	22	528	549	UCCACCCAUACCAUACAGACCC	GGGUCUAUACGGUAUGGGUGGA	Cleavage	[mRNA] locus=Scaffold000020:2309629:2312291:+	1
Bju-N11	5	Bra036054	2.5	17.706	1	22	537	558	UCCACCCAUACCAUACAGACCC	GGGUUUACAUGGUAUGGGUGGA	Cleavage	[mRNA] locus=Scaffold000112:301258:302166:-	1
Bju-N11	6	Bra027097	3	18.198	1	22	417	438	UCCACCCAUACCAUACAGACCC	GGGUCUGCACGGUAUGGGUGGU	Cleavage	[mRNA] locus=Scaffold000054:1034380:1037116:-	1
Bju-N11	7	Bra036995	3	21.725	1	22	528	549	UCCACCCAUACCAUACAGACCC	GGGUCUGCAUGGAAUGGGUGGU	Translation	[mRNA] locus=Scaffold000124:190655:193237:-	1
Bju-N11	8	Bra016311	3	20.86	1	22	438	459	UCCACCCAUACCAUACAGACCC	GGGACUUUAUGGUAUGGGUGGU	Cleavage	[mRNA] locus=Scaffold000020:199699:204377:-	1
Bju-N11	9	Bra026985	3	22.83	1	22	180	201	UCCACCCAUACCAUACAGACCC	GGGCCUCUACGGUAUGGGUGGA	Cleavage	[mRNA] locus=Scaffold000053:1476258:1479961:-	1
Bju-N11	10	Bra030779	3	19.622	1	22	525	546	UCCACCCAUACCAUACAGACCC	GGGUCUUUACGGGAUGGGUGGA	Translation	[mRNA] locus=Scaffold000072:1195373:1197984:-	1
Bju-N11	11	Bra030778	3	16.231	1	22	516	537	UCCACCCAUACCAUACAGACCC	GGGUAUUUACGGUAUGGGUGGA	Cleavage	[mRNA] locus=Scaffold000072:1191626:1194223:-	1
Bju-N11	12	Bra016782	3	19.268	1	22	528	549	UCCACCCAUACCAUACAGACCC	GGCUCUCUAUGGAAUGGGUGGA	Translation	[mRNA] locus=Scaffold000020:2314508:2317255:+	1
Bju-N11	13	Bra026266	3	18.389	1	22	162	184	UCCACCCAUAC-CAUACAGACCC	GGCUCUGUAUGUGAAUGGGUGGA	Translation	[mRNA] locus=Scaffold000051:273117:274775:+	1
Bju-N12	1	Bra016969	2.5	17.103	1	22	23	45	AGCUU-UGCGGUUGGUAGCGGUU	AACCGCUACCAACCGCACAAGCU	Cleavage	[mRNA] locus=Scaffold000021:553375:555457:+	1
Bju-N12	2	Bra029621	2.5	23.571	1	21	195	215	AGCUUUGCGGUUGGUAGCGGU	ACCGCUGCGAACCGUAGAGCU	Cleavage	[mRNA] locus=Scaffold000067:257256:258470:-	1
Bju-N12	3	Bra021431	3	19.535	1	21	640	660	AGCUUUGCGGUUGGUAGCGGU	AUUGCUGGCAACCGCAAGGCU	Cleavage	[mRNA] locus=Scaffold000034:1081391:1085727:-	1
Bju-N12	4	Bra024259	3	24.052	1	21	308	328	AGCUUUGCGGUUGGUAGCGGU	ACCGUUGGCAACCGCAAGGUU	Cleavage	[mRNA] locus=Scaffold000044:118267:119747:-	1
Bju-N12	5	Bra032688	3	11.389	1	20	58	77	AGCUUUGCGGUUGGUAGCGG	CCGCUAUCGACCGCAAACUU	Cleavage	[mRNA] locus=Scaffold000083:244303:245436:+	1
Bju-N12	6	Bra029613	2.5	20.393	1	20	1258	1277	AGCUUUGCGGUUGGUAGCGG	CUGGUACCAACCGCAGAGUU	Cleavage	[mRNA] locus=Scaffold000067:205568:208484:+	1
Bju-N12	7	Bra030569	3	22.062	1	21	361	381	AGCUUUGCGGUUGGUAGCGGU	GCCGCUCCUAACUGCAAGGUU	Cleavage	[mRNA] locus=Scaffold000072:315007:316963:-	1
Bju-N12	8	Bra012836	3	24.599	1	22	396	417	AGCUUUGCGGUUGGUAGCGGUU	ACCCGUUACUGGACGCAAAGCU	Translation	[mRNA] locus=Scaffold000013:1920177:1922361:+	1
Bju-N12	9	Bra006878	3	19.735	1	20	1613	1632	AGCUUUGCGGUUGGUAGCGG	CCGUUACUGGACGCAAAGCU	Translation	[mRNA] locus=Scaffold000006:29828:35385:-	1
Bju-N13	1	Bra007826	3	12.051	1	21	1346	1366	AGUUUGCGGAUGCGGAUGGUU	AACUAUCCGCAUCUUCAAAUU	Cleavage	[mRNA] locus=Scaffold000006:5203394:5208028:-	1
Bju-N13	2	Bra022319	3	13.413	1	21	607	627	AGUUUGCGGAUGCGGAUGGUU	GAUCAUCAAUAUCCGCAAACU	Cleavage	[mRNA] locus=Scaffold000037:1029314:1032084:-	1
Bju-N13	3	Bra027945	3	4.71	1	20	306	325	AGUUUGCGGAUGCGGAUGGU	ACCAGACGUAUCCGUAAACU	Cleavage	[mRNA] locus=Scaffold000058:1106516:1110874:+	1
Bju-N15	1	Bra022700	3	20.715	1	20	825	844	GAAGCGAUUUGUAGCGGUUU	GAACUGCUACAAGGCGCUUC	Cleavage	[mRNA] locus=Scaffold000038:1683463:1685325:+	1
Bju-N15	2	Bra005778	2.5	15.274	1	20	560	579	GAAGCGAUUUGUAGCGGUUU	AAACCGUUUCACAUCGCUUC	Translation	[mRNA] locus=Scaffold000005:561986:567269:-	1
Bju-N16	1	Bra035377	3	12.171	1	22	1241	1262	UUGGAAAGAUUAUGAGAGCAUG	CAUGCUCUUUUAAUCUUUGCAA	Cleavage	[mRNA] locus=Scaffold000104:391411:392880:-	1
Bju-N16	2	Bra020093	2	16.985	1	20	129	148	UUGGAAAGAUUAUGAGAGCA	UGCUCUCAUAGUCUUUGCAA	Cleavage	[mRNA] locus=Scaffold000030:272250:274412:+	1
Bju-N16	3	Bra006549	2	15.56	1	20	129	148	UUGGAAAGAUUAUGAGAGCA	UGCUCUCAUAGUCUUUGCAA	Cleavage	[mRNA] locus=Scaffold000005:3997840:3999866:+	1
Bju-N16	4	Bra028183	3	14.637	1	21	428	448	UUGGAAAGAUUAUGAGAGCAU	AUGCUCUCAUAUUCUUCCCAG	Translation	[mRNA] locus=Scaffold000060:719462:721835:-	1
Bju-N16	5	Bra020303	2.5	23.851	1	20	2150	2169	UUGGAAAGAUUAUGAGAGCA	GGCUCUCAAGAUCUUUCCAA	Cleavage	[mRNA] locus=Scaffold000030:1393924:1397730:-	1
Bju-N16	6	Bra026620	3	11.78	1	21	1145	1165	UUGGAAAGAUUAUGAGAGCAU	GUGUUCUCAUAACCGUUCCAA	Translation	[mRNA] locus=Scaffold000052:1054600:1056918:-	1
Bju-N16	7	Bra019480	3	20.363	1	20	443	462	UUGGAAAGAUUAUGAGAGCA	GGCUUUCAAGAUCUUUCCAA	Cleavage	[mRNA] locus=Scaffold000028:947070:948669:+	1
Bju-N16	8	Bra029748	3	14.501	1	20	187	206	UUGGAAAGAUUAUGAGAGCA	UGCUUUCACAAUCUUUACAA	Cleavage	[mRNA] locus=Scaffold000067:780136:781946:-	1
Bju-N18	1	Bra019452	2	15.651	1	20	2129	2148	AAGGGAACGGGCUUGGCAGA	UCUGUCAAGACCGUUCUCUU	Translation	[mRNA] locus=Scaffold000028:523419:529321:+	1
Bju-N18	2	Bra000062	3	14.258	1	20	976	995	AAGGGAACGGGCUUGGCAGA	UCUGCUAAGCUUGUCCCCUU	Cleavage	[mRNA] locus=Scaffold000001:348365:352739:-	1
Bju-N18	3	Bra031115	3	9.145	1	20	58	77	AAGGGAACGGGCUUGGCAGA	UUUGCUAGGCUCUUUCCCUU	Cleavage	[mRNA] locus=Scaffold000074:737210:740413:-	1
Bju-N18	4	Bra011405	3	16.897	1	20	1552	1571	AAGGGAACGGGCUUGGCAGA	UCUGGCAAGCCUGUUCCGUU	Cleavage	[mRNA] locus=Scaffold000011:2052561:2056846:-	1
Bju-N19	1	Bra026072	3	19.611	1	21	918	938	ACUGUUAACUGCGGGGCGGAG	UUCCCCUUCGCAGUUAACAGG	Cleavage	[mRNA] locus=Scaffold000050:877226:881335:-	1
Bju-N21	1	Bra000062	3	14.258	1	21	975	995	AAGGGAACGGGCUUGGCAGAU	AUCUGCUAAGCUUGUCCCCUU	Cleavage	[mRNA] locus=Scaffold000001:348365:352739:-	1
Bju-N21	2	Bra019452	2	15.651	1	20	2129	2148	AAGGGAACGGGCUUGGCAGA	UCUGUCAAGACCGUUCUCUU	Translation	[mRNA] locus=Scaffold000028:523419:529321:+	1
Bju-N21	3	Bra031115	3	9.145	1	20	58	77	AAGGGAACGGGCUUGGCAGA	UUUGCUAGGCUCUUUCCCUU	Cleavage	[mRNA] locus=Scaffold000074:737210:740413:-	1
Bju-N21	4	Bra011405	3	16.897	1	20	1552	1571	AAGGGAACGGGCUUGGCAGA	UCUGGCAAGCCUGUUCCGUU	Cleavage	[mRNA] locus=Scaffold000011:2052561:2056846:-	1
Bju-N23	1	Bra004363	2.5	14.132	1	22	114	135	AAAGCUUUUAACUUUGAAAACU	AGAUUUCAAAGUUAGGAGUUUU	Cleavage	[mRNA] locus=Scaffold000003:6792684:6793589:+	1
Bju-N23	2	Bra019941	3	18.894	1	21	924	944	AAAGCUUUUAACUUUGAAAAC	GUUGUCGACGUUAAAGGCUUU	Cleavage	[mRNA] locus=Scaffold000029:1907661:1909446:-	1
Bju-N23	3	Bra019943	3	22.305	1	21	1281	1301	AAAGCUUUUAACUUUGAAAAC	GUUGUCGACGUUAAAGGCUUU	Cleavage	[mRNA] locus=Scaffold000029:1914011:1915402:-	1
Bju-N25	1	Bra017855	2.5	12.237	1	20	840	859	CCGGGGGACGGACUGGGAAA	UUUUCCUGUCCCUCCCCCGG	Translation	[mRNA] locus=Scaffold000023:1785913:1787502:-	1
Bju-N26	1	Bra013577	3	19.474	1	20	229	248	GUUUGCGGAUGCGGAUGGUU	AACCAUUUGCAUUCGUGGAC	Cleavage	[mRNA] locus=Scaffold000014:1881948:1882409:+	1
Bju-N26	2	Bra007826	3	14.945	1	20	1346	1365	GUUUGCGGAUGCGGAUGGUU	AACUAUCCGCAUCUUCAAAU	Cleavage	[mRNA] locus=Scaffold000006:5203394:5208028:-	1
Bju-N26	3	Bra025909	3	18.991	1	20	200	219	GUUUGCGGAUGCGGAUGGUU	AACCAUCUGUUUCUGCAAGC	Translation	[mRNA] locus=Scaffold000050:57039:57495:-	1
Bju-N29	1	Bra030020	2.5	13.75	1	22	52	73	UGCGGACGGUUGCGGGAGGAUA	UUUCCUACCGCAACCGUCGGCA	Cleavage	[mRNA] locus=Scaffold000068:1279473:1280378:-	1
Bju-N30	1	Bra036733	2.5	14.805	1	20	295	314	AAGGGAACGGGCUUGGCCGA	AUGGCUAAGCCUGUUCCCUU	Cleavage	[mRNA] locus=Scaffold000120:21487:25293:-	2
Bju-N30	2	Bra036733	2.5	14.805	1	20	898	917	AAGGGAACGGGCUUGGCCGA	AUGGCUAAGCCUGUUCCCUU	Cleavage	[mRNA] locus=Scaffold000120:21487:25293:-	2
Bju-N30	3	Bra005780	3	10.426	1	20	52	71	AAGGGAACGGGCUUGGCCGA	UCGGCCAAACUCUUUCUCUU	Cleavage	[mRNA] locus=Scaffold000005:586092:589101:-	1
Bju-N30	4	Bra019452	3	15.651	1	20	2129	2148	AAGGGAACGGGCUUGGCCGA	UCUGUCAAGACCGUUCUCUU	Translation	[mRNA] locus=Scaffold000028:523419:529321:+	1
Bju-N30	5	Bra016455	3	22.614	1	20	427	446	AAGGGAACGGGCUUGGCCGA	UUGCCCAAGCCAGUUCUCUU	Translation	[mRNA] locus=Scaffold000020:915348:921735:-	1
Bju-N31	1	Bra027793	3	13.535	1	20	7	26	GUCCGGAGACGUCGGCGGGA	UCCCUCCGAUUUCUCCGGAU	Translation	[mRNA] locus=Scaffold000057:1274851:1278403:-	1
Bju-N35	1	Bra003401	3	19.011	1	21	1424	1444	CAGAGCCUACAGACACUAGCU	GGCUAGUGUUUGUGGACUUUG	Cleavage	[mRNA] locus=Scaffold000003:1577546:1581170:+	1
Bju-N35	2	Bra011494	2.5	20.332	1	20	1453	1472	CAGAGCCUACAGACACUAGC	GCUUGUGUCUGUAGGCUGUG	Cleavage	[mRNA] locus=Scaffold000011:2422599:2427567:+	1
Bju-N35	3	Bra011491	2.5	20.332	1	20	1465	1484	CAGAGCCUACAGACACUAGC	GCUUGUGUCUGUAGGCUGUG	Cleavage	[mRNA] locus=Scaffold000011:2414667:2417501:+	1
Bju-N35	4	Bra006393	3	19.738	1	21	398	418	CAGAGCCUACAGACACUAGCU	AGCUCAUGUCUGCAGGCUCUG	Translation	[mRNA] locus=Scaffold000005:3324898:3329721:+	1
Bju-N35	5	Bra024652	3	24.519	1	20	2816	2835	CAGAGCCUACAGACACUAGC	GCAAGUCUCUGAAGGCUCUG	Translation	[mRNA] locus=Scaffold000045:901319:907070:-	1
Bju-N37	1	Bra015218	3	21.55	1	21	886	906	CGUGUCGGCUGGGGGACGGAC	GUCCGUCUCUCAGACGACACU	Cleavage	[mRNA] locus=Scaffold000018:424416:425732:+	1
Bju-N37	2	Bra036134	2.5	8.367	1	20	60	79	CGUGUCGGCUGGGGGACGGA	UCCUUCCCCAAGCCGAUACG	Translation	[mRNA] locus=Scaffold000113:149830:150408:+	1
Bju-N37	3	Bra009997	3	12.394	1	20	60	79	CGUGUCGGCUGGGGGACGGA	UCCUUCCCCAAGCCGGUACG	Translation	[mRNA] locus=Scaffold000009:2167024:2167602:-	1
Bju-N38	1	Bra037341	3	16.059	1	21	446	466	UUAGAUGACCAUCAACAAAUA	UGUUUGUUGCUGUUCAUCUGA	Translation	[mRNA] locus=Scaffold000128:164519:172574:+	1
Bju-N38	2	Bra023716	3	19.799	1	20	33	52	UUAGAUGACCAUCAACAAAU	AUUUGUUGAUGAACAUCUGG	Translation	[mRNA] locus=Scaffold000041:1942418:1942819:+	1
Bju-N41	1	Bra016969	2	15.014	1	21	18	38	GCGGUUGGUAGCGGUUGACAG	CCGACAACCGCUACCAACCGC	Cleavage	[mRNA] locus=Scaffold000021:553375:555457:+	1
Bju-N41	2	Bra036384	3	20.404	1	22	863	884	GCGGUUGGUAGCGGUUGACAGC	GGUGUCAACCGCCAUCAACAGC	Translation	[mRNA] locus=Scaffold000116:66381:73724:-	1
Bju-N41	3	Bra033662	3	17.656	1	21	434	453	GCGGUUGGUAGCGGUUGACAG	CUGUUAACC-CUAUCAACCGC	Cleavage	[mRNA] locus=Scaffold000089:513910:518385:-	1
Bju-N42	1	Bra009775	3	13.544	1	21	350	370	AGCAAACGAGGAUUGAACGGA	UUUUCUCAAUCCUCGUUUGCU	Cleavage	[mRNA] locus=Scaffold000009:810415:811901:-	1
Bju-N43	1	Bra012757	1.5	17.323	1	20	734	753	UGGCUCUGAUACCAUGAAGU	AUUUUAUGGUAUCGGAGCCA	Cleavage	[mRNA] locus=Scaffold000013:1511803:1514024:+	1
Bju-N43	2	Bra023152	3	21.985	1	21	904	924	UGGCUCUGAUACCAUGAAGUA	UACUUCAUGAUAUCAGGGCUC	Cleavage	[mRNA] locus=Scaffold000040:416058:417900:-	1
Bju-N43	3	Bra029637	3	16.791	1	21	729	749	UGGCUCUGAUACCAUGAAGUA	UGCUCCAAGGUAUCAGGGCCA	Cleavage	[mRNA] locus=Scaffold000067:332767:336619:-	1
Bju-N44	1	Bra027297	3	22.878	1	20	178	197	GCCGACUUAGCUCAGUGGUA	UACCACAGGGCGAAGUUGGC	Translation	[mRNA] locus=Scaffold000055:709618:711880:-	1
Bju-N46	1	Bra015221	1.5	22.792	1	20	1220	1239	GCUGUUGGAGCUGGAUGGCA	UGCCAUCUAGCUCUAAUAGC	Cleavage	[mRNA] locus=Scaffold000018:467561:470352:+	1
Bju-N46	2	Bra028876	2	21.906	1	20	5243	5262	GCUGUUGGAGCUGGAUGGCA	UGCCAUCUGACUCCAACAGC	Translation	[mRNA] locus=Scaffold000063:1113160:1121047:-	1
Bju-N47	1	Bra001109	2.5	20.579	1	21	93	113	GAAGUGUUCGGAUCGCGGCGU	ACGCCGUGAUUGGAACACUUU	Translation	[mRNA] locus=Scaffold000001:6023205:6023777:-	1
Bju-N47	2	Bra040188	2.5	21.811	1	21	105	125	GAAGUGUUCGGAUCGCGGCGU	ACGCCGUGAUUGGAACACUUU	Translation	[mRNA] locus=Scaffold000191:19083:19676:+	1
Bju-N47	3	Bra040137	2.5	15.233	1	21	114	134	GAAGUGUUCGGAUCGCGGCGU	ACGCCGUGAUUGGAACACUUU	Translation	[mRNA] locus=Scaffold000189:101503:104459:+	1
Bju-N47	4	Bra019162	3	23.43	1	20	572	591	GAAGUGUUCGGAUCGCGGCG	CGCCGCCGUCCGUACAUUUC	Cleavage	[mRNA] locus=Scaffold000027:758405:759049:+	1
Bju-N47	5	Bra009051	3	17.954	1	21	945	965	GAAGUGUUCGGAUCGCGGCGU	GCUCCAAGAUCCGAACACUUC	Cleavage	[mRNA] locus=Scaffold000008:2230697:2232701:-	1
Bju-N48	1	Bra029443	0	13.269	1	21	44	64	UUUGAUCUUGUGUUGUGAUGA	UCAUCACAACACAAGAUCAAA	Cleavage	[mRNA] locus=Scaffold000066:214360:216965:-	1
Bju-N48	2	Bra017807	0	11.036	1	21	1124	1144	UUUGAUCUUGUGUUGUGAUGA	UCAUCACAACACAAGAUCAAA	Cleavage	[mRNA] locus=Scaffold000023:1369463:1373723:+	1
Bju-N48	3	Bra010590	0	14.009	1	21	1034	1054	UUUGAUCUUGUGUUGUGAUGA	UCAUCACAACACAAGAUCAAA	Cleavage	[mRNA] locus=Scaffold000010:2144325:2148423:+	1
Bju-N48	4	Bra003949	1.5	13.226	1	21	307	327	UUUGAUCUUGUGUUGUGAUGA	UUAUUACAGCACAAGAUCAAA	Cleavage	[mRNA] locus=Scaffold000003:4474607:4476241:-	1
Bju-N48	5	Bra010589	1.5	12.554	1	21	983	1003	UUUGAUCUUGUGUUGUGAUGA	UCAUCACAACACAAGAUGAAA	Cleavage	[mRNA] locus=Scaffold000010:2138179:2141717:+	1
Bju-N48	6	Bra010588	1	14.802	1	21	638	658	UUUGAUCUUGUGUUGUGAUGA	UCAUCACAACCCAAGAUCAAA	Translation	[mRNA] locus=Scaffold000010:2128423:2137179:+	1
Bju-N48	7	Bra007931	2	12.862	1	21	307	327	UUUGAUCUUGUGUUGUGAUGA	UUGUUACAGCACAAGAUCAAA	Cleavage	[mRNA] locus=Scaffold000007:565208:566756:+	1
Bju-N48	8	Bra036417	2	23.331	1	21	1106	1126	UUUGAUCUUGUGUUGUGAUGA	UCGUUACAACGCAAGAUCGAA	Cleavage	[mRNA] locus=Scaffold000117:27353:30224:+	1
Bju-N48	9	Bra006095	1.5	13.394	1	21	452	472	UUUGAUCUUGUGUUGUGAUGA	UAAUCACAACACAAGAUCAGA	Cleavage	[mRNA] locus=Scaffold000005:1966710:1969885:-	1
Bju-N48	10	Bra010663	1.5	16.778	1	21	995	1015	UUUGAUCUUGUGUUGUGAUGA	UAAUCACAACACAGGAUCAAA	Cleavage	[mRNA] locus=Scaffold000010:2643158:2648829:+	1
Bju-N48	11	Bra038872	2	22.508	1	21	1115	1135	UUUGAUCUUGUGUUGUGAUGA	UCAUUACGACGCAAGAUCGAA	Cleavage	[mRNA] locus=Scaffold000154:111827:115481:+	1
Bju-N48	12	Bra006094	1.5	10.761	1	21	1112	1132	UUUGAUCUUGUGUUGUGAUGA	UAAUCACAACACAAGAUCAGA	Cleavage	[mRNA] locus=Scaffold000005:1961507:1965536:-	1
Bju-N48	13	Bra006556	2	12.702	1	21	1148	1168	UUUGAUCUUGUGUUGUGAUGA	UAAUCACAGCACAAGAUCAGA	Cleavage	[mRNA] locus=Scaffold000005:4031310:4035457:+	1
Bju-N48	14	Bra019409	2.5	14.545	1	21	1127	1147	UUUGAUCUUGUGUUGUGAUGA	UUGUCACAACACAAGAUAAAA	Cleavage	[mRNA] locus=Scaffold000027:2377642:2382367:+	1
Bju-N48	15	Bra031705	3	13.109	1	21	505	525	UUUGAUCUUGUGUUGUGAUGA	UCAUCACAACAUGAGACCGAA	Cleavage	[mRNA] locus=Scaffold000077:799358:805742:+	1
Bju-N48	16	Bra019410	2.5	15.344	1	21	1178	1198	UUUGAUCUUGUGUUGUGAUGA	UAAUCACAACACAAGAUAAAA	Cleavage	[mRNA] locus=Scaffold000027:2384781:2390142:+	1
Bju-N48	17	Bra010496	2	19.359	1	21	1208	1228	UUUGAUCUUGUGUUGUGAUGA	UAAUCACAUCACAAGAUCAAA	Cleavage	[mRNA] locus=Scaffold000010:1605577:1609744:+	1
Bju-N48	18	Bra035882	3	15.621	1	21	466	486	UUUGAUCUUGUGUUGUGAUGA	UCGUCGCAGAGCAAGAUCAAA	Cleavage	[mRNA] locus=Scaffold000110:239525:240256:-	1
Bju-N48	19	Bra040208	3	12.024	1	21	485	505	UUUGAUCUUGUGUUGUGAUGA	UCAUCACAACAAAGGAUAAAA	Translation	[mRNA] locus=Scaffold000191:113021:118210:+	1
Bju-N48	20	Bra027510	3	13.192	1	21	1382	1402	UUUGAUCUUGUGUUGUGAUGA	UUAUAACAACACAAGAUCAUA	Cleavage	[mRNA] locus=Scaffold000056:605261:610632:+	1
Bju-N48	21	Bra000401	2.5	16.491	1	20	689	708	UUUGAUCUUGUGUUGUGAUG	CGUCACGACCCAAGAUCAAG	Translation	[mRNA] locus=Scaffold000001:2165794:2167049:+	1
Bju-N48	22	Bra001895	3	15.187	1	20	308	327	UUUGAUCUUGUGUUGUGAUG	UGUUACAGCACAAGGUUAAA	Cleavage	[mRNA] locus=Scaffold000001:10415527:10417205:-	1
Bju-N50	1	Bra005513	3	10.183	1	20	285	304	GAAAGUCGUCGCGGAAGGGU	ACCCUUCCCCGAUGACUUCC	Cleavage	[mRNA] locus=Scaffold000004:5918921:5920737:+	1
Bju-N50	2	Bra037822	3	16.232	1	20	488	507	GAAAGUCGUCGCGGAAGGGU	ACCAUUCUCCGGCGACUUUC	Cleavage	[mRNA] locus=Scaffold000133:379982:380836:-	1
Bju-N51	1	Bra020857	3	14.143	1	21	65	85	UCAAGAUUGGAAAGAUUAUGA	UCAUAAUCUUUGCAAUUCUGA	Translation	[mRNA] locus=Scaffold000032:396626:399505:+	1
Bju-N51	2	Bra024471	3	21.256	1	21	357	377	UCAAGAUUGGAAAGAUUAUGA	UGAUAAACUUUUUAAUCUUGA	Cleavage	[mRNA] locus=Scaffold000044:1517981:1519926:+	1
Bju-N51	3	Bra038273	3	15.265	1	20	259	278	UCAAGAUUGGAAAGAUUAUG	UAUGAUCUCUCUAGUCUUGA	Cleavage	[mRNA] locus=Scaffold000143:64293:67544:-	1
Bju-N51	4	Bra018213	3	12.849	1	21	1293	1313	UCAAGAUUGGAAAGAUUAUGA	UCAAAAUCUUACCCAUCUUGA	Translation	[mRNA] locus=Scaffold000024:2325373:2337687:-	1
Bju-N51	5	Bra019608	3	14.853	1	21	1197	1217	UCAAGAUUGGAAAGAUUAUGA	UCAAAAUCUUACCCAUCUUGA	Translation	[mRNA] locus=Scaffold000028:2268070:2272218:-	1
Bju-N52	1	Bra015892	1.5	12.296	1	20	239	258	AGGUGGGUUGGAGAUGGUCU	AGAUCAUCUCUAAUCCACCU	Cleavage	[mRNA] locus=Scaffold000019:1366025:1368943:+	1
Bju-N52	2	Bra005394	3	15.026	1	21	392	412	AGGUGGGUUGGAGAUGGUCUA	UGGACCAUCUUCGACUCGUCU	Cleavage	[mRNA] locus=Scaffold000004:5196478:5197719:-	1
Bju-N52	3	Bra029028	3	17.97	1	21	494	514	AGGUGGGUUGGAGAUGGUCUA	UAGACCAUCUCAAGUUCACUU	Translation	[mRNA] locus=Scaffold000064:534875:536069:-	1
Bju-N52	4	Bra031763	3	9.028	1	21	1392	1412	AGGUGGGUUGGAGAUGGUCUA	UGGCUCAUCUCCAAUCCAUCU	Cleavage	[mRNA] locus=Scaffold000077:1101574:1104948:-	1
Bju-N52	5	Bra025066	3	23.691	1	20	863	882	AGGUGGGUUGGAGAUGGUCU	AGAUCAUCUUCAGCCGACCU	Cleavage	[mRNA] locus=Scaffold000046:1592110:1594037:-	1
Bju-N52	6	Bra015659	3	24.039	1	20	812	831	AGGUGGGUUGGAGAUGGUCU	AGGGCAUCUCCAACCCAACU	Cleavage	[mRNA] locus=Scaffold000019:216952:218399:-	1
Bju-N52	7	Bra014436	3	13.909	1	20	240	259	AGGUGGGUUGGAGAUGGUCU	AGAACAUUUCCAGCCUACUU	Cleavage	[mRNA] locus=Scaffold000016:421705:423613:-	1
Bju-N53	1	Bra030772	3	19.102	1	20	952	971	UGGAACGACGAAGAAGCUGU	ACAGCUUCUUCGUCGAUCUU	Cleavage	[mRNA] locus=Scaffold000072:1177699:1179309:+	1
Bju-N53	2	Bra023749	3	24.801	1	20	205	224	UGGAACGACGAAGAAGCUGU	GUGGCUUCUUCGUCGUCCCA	Cleavage	[mRNA] locus=Scaffold000042:295463:295825:-	1
Bju-N53	3	Bra009114	3	15.418	1	22	232	253	UGGAACGACGAAGAAGCUGUGC	GUAGAGAUUCUCCGUCGUUCCA	Translation	[mRNA] locus=Scaffold000008:2494209:2497071:+	1
Bju-N53	4	Bra014719	2.5	5.724	1	22	3	24	UGGAACGACGAAGAAGCUGUGC	GAACCGCUUCGUCGUCGUUUCA	Cleavage	[mRNA] locus=Scaffold000016:2281622:2284900:+	1
Bju-N54	1	Bra040457	3	23.125	1	22	540	561	GCUGCGUUCGGACGCAGACGCA	UCCCUCUGCGUUUGAACGCGGU	Cleavage	[mRNA] locus=Scaffold000207:16208:19397:-	1
Bju-N56	1	Bra002987	3	9.869	1	22	107	128	AGGUUCGGAGCGGUUUGAAGCA	UGCUUCAAACCGCUCCUGGCUU	Cleavage	[mRNA] locus=Scaffold000002:6528997:6530094:+	1
Bju-N56	2	Bra021923	2	11.442	1	20	212	231	AGGUUCGGAGCGGUUUGAAG	GUUCAAACCGCUCUGAGCCU	Cleavage	[mRNA] locus=Scaffold000035:1904029:1904523:+	1
Bju-N56	3	Bra002598	2	8.65	1	20	2279	2298	AGGUUCGGAGCGGUUUGAAG	CUUCAAACCGUUUCGAGCUU	Cleavage	[mRNA] locus=Scaffold000002:4147081:4153473:+	1
Bju-N56	4	Bra029624	3	9.677	1	22	644	665	AGGUUCGGAGCGGUUUGAAGCA	UGCUUCAAAACUCUCCGGAUCU	Translation	[mRNA] locus=Scaffold000067:266591:268897:-	1
Bju-N57	1	Bra005086	2	14.99	1	20	3648	3667	GAAAGACGGCUGCUUCCUGA	UAAGGAAGCACCCGUCUUUC	Translation	[mRNA] locus=Scaffold000004:3357618:3364049:+	1
Bju-N59	1	Bra015296	2.5	14.343	1	20	1103	1122	CGGGACAAGCGGUUCAACUG	CGCUUGGACCGCUUGUCCUG	Cleavage	[mRNA] locus=Scaffold000018:1136126:1139271:-	1
Bju-N59	2	Bra007566	3	22.064	1	20	665	684	CGGGACAAGCGGUUCAACUG	UAGUUGAACAGCUUGUCCGG	Translation	[mRNA] locus=Scaffold000006:3910636:3912386:+	1
Bju-N59	3	Bra003429	3	21.127	1	20	761	780	CGGGACAAGCGGUUCAACUG	UAGUUGAACAGCUUGUCCGG	Translation	[mRNA] locus=Scaffold000003:1702982:1704639:+	1
Bju-N60	1	Bra001532	2.5	9.37	1	21	378	398	GUUGGUGGAGCGAUUGUCUGG	UCAGACAAUUGCUCCUUCAAC	Cleavage	[mRNA] locus=Scaffold000001:8116380:8117765:+	1
Bju-N60	2	Bra038886	3	19.278	1	21	295	315	GUUGGUGGAGCGAUUGUCUGG	UUGGACAAUCCUUUCACCAAC	Translation	[mRNA] locus=Scaffold000154:235377:241370:-	1
Bju-N60	3	Bra032179	3	16.719	1	21	384	404	GUUGGUGGAGCGAUUGUCUGG	UCAGACAGUUGAUCUACCAGC	Translation	[mRNA] locus=Scaffold000079:1108412:1109793:+	1
Bju-N60	4	Bra027167	3	19.529	1	20	1442	1461	GUUGGUGGAGCGAUUGUCUG	CAGGCACUUGCUCCACCAAA	Cleavage	[mRNA] locus=Scaffold000055:2604:4798:+	1
Bju-N60	5	Bra038497	3	24.251	1	21	377	397	GUUGGUGGAGCGAUUGUCUGG	UCGGAAAAUGGUUCCACCAAC	Cleavage	[mRNA] locus=Scaffold000147:329675:334304:+	1
Bju-N60	6	Bra026429	3	20.133	1	21	729	749	GUUGGUGGAGCGAUUGUCUGG	UCAGAUGACCGGUCCACCAAC	Translation	[mRNA] locus=Scaffold000051:1207113:1207904:-	1
Bju-N61	1	Bra027869	3	17.667	1	21	354	374	GUGCACUGACGGACGUCCUGC	GCAGGACGUUCGUCUGUGUAU	Cleavage	[mRNA] locus=Scaffold000058:490413:494546:+	1
Bju-N62	1	Bra005713	3	16.782	1	21	657	677	AGAGACUGGCCCGCAUGGAUU	AAUUCUUGUCGGCCAGUCUCU	Cleavage	[mRNA] locus=Scaffold000005:247179:249257:+	1
Bju-N62	2	Bra029171	3	19.708	1	22	782	803	AGAGACUGGCCCGCAUGGAUUU	AUAUCCAUGUGGGGCAGUCUUA	Translation	[mRNA] locus=Scaffold000064:1259607:1261980:-	1
Bju-N62	3	Bra022551	3	15.331	1	22	806	827	AGAGACUGGCCCGCAUGGAUUU	AUAUCCAUGUGGGACAGUCUUA	Translation	[mRNA] locus=Scaffold000038:567914:570741:+	1
Bju-N62	4	Bra031764	3	17.809	1	21	1107	1127	AGAGACUGGCCCGCAUGGAUU	AAUCAAUGCGGAACAGUCUCU	Translation	[mRNA] locus=Scaffold000077:1108947:1111935:+	1
Bju-N63	1	Bra012322	3	21.917	1	22	1104	1125	ACCGACCGUCGGAUGGGAUGGG	CUUGUCUCAUCCGGCGGUCGGA	Cleavage	[mRNA] locus=Scaffold000012:2912765:2915334:-	1
Bju-N64	1	Bra034243	3	21.233	1	21	860	880	UGUCCGUAAAGAUGUCGAGCG	CGCUAGACGUCUUUGUGGACG	Cleavage	[mRNA] locus=Scaffold000093:941387:943204:+	1
Bju-N64	2	Bra031143	3	20.492	1	20	690	709	UGUCCGUAAAGAUGUCGAGC	GCUUGACGUCUUUGCGCACA	Cleavage	[mRNA] locus=Scaffold000074:831538:832898:+	1
Bju-N64	3	Bra018311	3	21.316	1	20	318	337	UGUCCGUAAAGAUGUCGAGC	CUUCGACAUCUUCACGGGCA	Cleavage	[mRNA] locus=Scaffold000025:554775:556794:+	1
Bju-N64	4	Bra022803	3	21.118	1	20	318	337	UGUCCGUAAAGAUGUCGAGC	CUUCGACAUCUUCACGGGCA	Cleavage	[mRNA] locus=Scaffold000039:343100:344997:-	1
Bju-N64	5	Bra022418	3	23.406	1	20	186	205	UGUCCGUAAAGAUGUCGAGC	GUUCGAAAUCUUCAUGGACA	Cleavage	[mRNA] locus=Scaffold000037:1646093:1647903:+	1
Bju-N65	1	Bra031781	2.5	20.223	1	21	485	505	UUAACGGAACUAAAGUUGAGG	UUUCAGCUUCAGUUCUGUUAA	Cleavage	[mRNA] locus=Scaffold000077:1182803:1184355:-	1
Bju-N65	2	Bra023959	3	18.413	1	21	314	334	UUAACGGAACUAAAGUUGAGG	UCUCAGCUUUUGUGCCGUUGA	Translation	[mRNA] locus=Scaffold000043:85361:87213:+	1
Bju-N66	1	Bra026687	1.5	23.34	1	21	875	895	GAGCUGGAGUAGUGGAAGGAU	GUUCUUCGACUACUCCAGCUC	Cleavage	[mRNA] locus=Scaffold000053:69042:70941:-	1
Bju-N66	2	Bra007095	3	13.199	1	22	400	421	GAGCUGGAGUAGUGGAAGGAUA	UAUCUUUUCACAACUCCGGUUC	Translation	[mRNA] locus=Scaffold000006:1375086:1375729:-	1
Bju-N66	3	Bra024380	3	16.912	1	22	412	433	GAGCUGGAGUAGUGGAAGGAUA	UAUCUUUUCACAACUCCGGUUC	Translation	[mRNA] locus=Scaffold000044:900922:903739:-	1
Bju-N66	4	Bra037814	3	13.199	1	22	400	421	GAGCUGGAGUAGUGGAAGGAUA	UAUCUUUUCACAACUCCGGUUC	Translation	[mRNA] locus=Scaffold000133:324550:328013:-	1
Bju-N66	5	Bra024381	3	8.267	1	22	403	424	GAGCUGGAGUAGUGGAAGGAUA	UAUCUUUUCACAACUCCGGUUC	Translation	[mRNA] locus=Scaffold000044:908155:911559:-	1
Bju-N66	6	Bra015880	1.5	12.784	1	20	507	526	GAGCUGGAGUAGUGGAAGGA	UGCUUCCACUACUCCAGUUC	Cleavage	[mRNA] locus=Scaffold000019:1331402:1332550:+	1
Bju-N66	7	Bra030627	2	16.389	1	22	617	638	GAGCUGGAGUAGUGGAAGGAUA	UCUCUUUCAACUACUCUAGCUC	Cleavage	[mRNA] locus=Scaffold000072:574058:575577:+	1
Bju-N66	8	Bra029530	2.5	19.923	1	22	637	658	GAGCUGGAGUAGUGGAAGGAUA	UCUCCUUUUACUGCUCUAGCUU	Cleavage	[mRNA] locus=Scaffold000066:939953:947344:+	1
Bju-N66	9	Bra016669	2	22.997	1	20	2484	2503	GAGCUGGAGUAGUGGAAGGA	UCCUUUCACUCCUCUAGCUC	Translation	[mRNA] locus=Scaffold000020:1866814:1872561:+	1
Bju-N66	10	Bra022719	2	12.184	1	21	162	182	GAGCUGGAGUAGUGGAAGGAU	GUCCUUCCUCUUCUCCAGCUC	Translation	[mRNA] locus=Scaffold000038:1803255:1804445:+	1
Bju-N66	11	Bra029236	3	10.636	1	22	244	265	GAGCUGGAGUAGUGGAAGGAUA	UGUGCCUCCACUACUCCAGCUG	Cleavage	[mRNA] locus=Scaffold000065:201147:204766:+	1
Bju-N66	12	Bra017513	3	13.624	1	21	4270	4290	GAGCUGGAGUAGUGGAAGGAU	AUCCUUGCAUUGCUUCAGUUC	Cleavage	[mRNA] locus=Scaffold000022:1583154:1594885:-	1
Bju-N66	13	Bra022297	3	13.669	1	20	1035	1054	GAGCUGGAGUAGUGGAAGGA	UUCUUCUGCUACUUCAGUUU	Cleavage	[mRNA] locus=Scaffold000037:914613:916786:+	1
Bju-N66	14	Bra022296	3	13.669	1	20	1092	1111	GAGCUGGAGUAGUGGAAGGA	UUCUUCUGCUACUUCAGUUU	Cleavage	[mRNA] locus=Scaffold000037:914556:916786:+	1
Bju-N66	15	Bra017285	3	19.418	1	21	695	715	GAGCUGGAGUAGUGGAAGGAU	GUCCUUCUCUUGCUCCGGCUC	Cleavage	[mRNA] locus=Scaffold000021:2362015:2364181:-	1
Bju-N66	16	Bra013960	3	18.609	1	20	282	301	GAGCUGGAGUAGUGGAAGGA	CUCUUUCUCUACUCCAGCUC	Cleavage	[mRNA] locus=Scaffold000015:21881:23594:+	1
Bju-N67	1	Bra017420	2	9.39	1	21	1172	1192	GUUGGGCUUGAGACGGUUGGG	CUGAACUGUCUCAAGCCCAAC	Cleavage	[mRNA] locus=Scaffold000022:818328:820776:+	1
Bju-N67	2	Bra030576	3	14.707	1	21	3828	3848	GUUGGGCUUGAGACGGUUGGG	CCCAACUGGCUCAAGCCCCAC	Cleavage	[mRNA] locus=Scaffold000072:342771:352404:+	1
Bju-N67	3	Bra019981	3	11.498	1	20	470	489	GUUGGGCUUGAGACGGUUGG	UAAACCGUCUCAAGUUCAAC	Cleavage	[mRNA] locus=Scaffold000029:2094879:2096045:+	1
Bju-N67	4	Bra018674	3	16.616	1	20	2797	2816	GUUGGGCUUGAGACGGUUGG	UUAGCCGUCUCAAACCCAAC	Cleavage	[mRNA] locus=Scaffold000026:502746:510458:-	1
Bju-N67	5	Bra034878	2.5	8.978	1	20	227	246	GUUGGGCUUGAGACGGUUGG	CCAACCGUCUCCAGCUCGGC	Translation	[mRNA] locus=Scaffold000099:105123:107408:+	1
Bju-N67	6	Bra035469	3	10.89	1	20	509	528	GUUGGGCUUGAGACGGUUGG	UUAACCGUUUCAAGUUUAAC	Cleavage	[mRNA] locus=Scaffold000105:722832:724103:+	1
Bju-N67	7	Bra016710	3	10.719	1	21	82	102	GUUGGGCUUGAGACGGUUGGG	UUCAACCGCCUCAAGUCUAAU	Cleavage	[mRNA] locus=Scaffold000020:2001268:2003603:-	1
Bju-N67	8	Bra009944	3	10.323	1	21	253	273	GUUGGGCUUGAGACGGUUGGG	CCCAAAUUUCUCAAGCCCGAC	Cleavage	[mRNA] locus=Scaffold000009:1875957:1876893:-	1
Bju-N67	9	Bra032701	3	9.071	1	20	218	237	GUUGGGCUUGAGACGGUUGG	CCAACCGUCUUCAGCUCGGC	Translation	[mRNA] locus=Scaffold000083:365150:367376:-	1
Bju-N70	1	Bra007728	0	12.437	1	21	202	222	CUUGUCGGAGUUUAUGAUCUC	GAGAUCAUAAACUCCGACAAG	Cleavage	[mRNA] locus=Scaffold000006:4686807:4687805:-	1
Bju-N70	2	Bra040431	0	16.296	1	21	202	222	CUUGUCGGAGUUUAUGAUCUC	GAGAUCAUAAACUCCGACAAG	Cleavage	[mRNA] locus=Scaffold000205:1125:2129:-	1
Bju-N70	3	Bra004037	1	9.605	1	21	217	237	CUUGUCGGAGUUUAUGAUCUC	GAGAUCAUAAACUCCGACAAA	Cleavage	[mRNA] locus=Scaffold000003:5005680:5006681:+	1
Bju-N70	4	Bra033933	1	13.307	1	21	253	273	CUUGUCGGAGUUUAUGAUCUC	GAGAUCAUAAACUCCGACAAA	Cleavage	[mRNA] locus=Scaffold000092:128972:130066:+	1
Bju-N70	5	Bra023701	1	14.522	1	21	190	210	CUUGUCGGAGUUUAUGAUCUC	GAGAUCGUAAAUUCCGACAAG	Cleavage	[mRNA] locus=Scaffold000041:1844832:1845827:-	1
Bju-N70	6	Bra002204	1	10.627	1	21	190	210	CUUGUCGGAGUUUAUGAUCUC	GAGAUCGUAAACUCUGACAAG	Cleavage	[mRNA] locus=Scaffold000002:1873473:1874477:-	1
Bju-N70	7	Bra014968	1	13.883	1	21	181	201	CUUGUCGGAGUUUAUGAUCUC	GAUAUCAUAAACUCCGACAAG	Cleavage	[mRNA] locus=Scaffold000017:992866:993864:+	1
Bju-N70	8	Bra033199	2	18.507	1	21	1618	1638	CUUGUCGGAGUUUAUGAUCUC	GAGAUCAUGAGCUCCGGCGAG	Cleavage	[mRNA] locus=Scaffold000086:986351:990747:-	1
Bju-N70	9	Bra037537	2.5	11.122	1	21	202	222	CUUGUCGGAGUUUAUGAUCUC	GAGAUCAUCAACUCUGACAAA	Cleavage	[mRNA] locus=Scaffold000130:45023:46744:+	1
Bju-N70	10	Bra001737	2.5	15.472	1	21	205	225	CUUGUCGGAGUUUAUGAUCUC	GAGAUCAUCAACUCUGACAAA	Cleavage	[mRNA] locus=Scaffold000001:9406851:9408184:-	1
Bju-N70	11	Bra020694	2.5	16.794	1	20	254	273	CUUGUCGGAGUUUAUGAUCU	AGAUCAUAAACUCUGGGAAG	Cleavage	[mRNA] locus=Scaffold000031:1516801:1517226:-	1
Bju-N70	12	Bra000963	2.5	22.748	1	21	1312	1332	CUUGUCGGAGUUUAUGAUCUC	GUGAUCAUAGUCUCCGACAAG	Translation	[mRNA] locus=Scaffold000001:5376955:5380104:-	1
Bju-N70	13	Bra040220	2.5	20.367	1	20	1156	1175	CUUGUCGGAGUUUAUGAUCU	GGAUCAUCAGCUCCGAUAAG	Cleavage	[mRNA] locus=Scaffold000192:2552:4337:+	1
Bju-N70	14	Bra027173	2.5	15.319	1	20	746	765	CUUGUCGGAGUUUAUGAUCU	AGCUUAUAGAUUCCGACAAG	Cleavage	[mRNA] locus=Scaffold000055:59594:64054:-	1
Bju-N70	15	Bra011679	3	19.307	1	20	662	681	CUUGUCGGAGUUUAUGAUCU	AGAUCCUAGAUUCCGACAAA	Cleavage	[mRNA] locus=Scaffold000011:3284308:3287505:-	1
Bju-N71	1	Bra021923	2.5	11.96	1	21	213	233	AGAGGUUCGGAGCGGUUUGAA	UUCAAACCGCUCUGAGCCUUC	Cleavage	[mRNA] locus=Scaffold000035:1904029:1904523:+	1
Bju-N73	1	Bra018810	0	20.132	1	21	97	117	GCGGAGGAGACUGCGUGAGGC	GCCUCACGCAGUCUCCUCCGC	Cleavage	[mRNA] locus=Scaffold000026:1373960:1375548:+	1
Bju-N73	2	Bra003807	2	18.682	1	20	139	158	GCGGAGGAGACUGCGUGAGG	CCUCAAGCAAUCUCCUCCGC	Translation	[mRNA] locus=Scaffold000003:3711982:3715069:+	1
Bju-N73	3	Bra027460	3	15.596	1	20	81	100	GCGGAGGAGACUGCGUGAGG	CUUCGUGCAAUCUCCUUCGC	Translation	[mRNA] locus=Scaffold000056:158072:159568:-	1
Bju-N73	4	Bra034865	3	23.744	1	20	195	214	GCGGAGGAGACUGCGUGAGG	CCACGCGCCGUCUCCUCCGU	Cleavage	[mRNA] locus=Scaffold000098:871265:871768:-	1
Bju-N74	1	Bra026971	3	14.155	1	22	1186	1206	UAUGAGAGUAUUAUAAAGUCAC	GUGACUU-AUAAUACUUUUAUA	Cleavage	[mRNA] locus=Scaffold000053:1389173:1391062:-	1
Bju-N74	2	Bra036649	3	20.427	1	22	661	681	UAUGAGAGUAUUAUAAAGUCAC	GUGACUU-AUAACACUCUCAUA	Translation	[mRNA] locus=Scaffold000119:93943:95118:-	1
Bju-N74	3	Bra027726	3	22.873	1	22	805	825	UAUGAGAGUAUUAUAAAGUCAC	GUGACGU-AUAAUACUCUCAUA	Cleavage	[mRNA] locus=Scaffold000057:793718:795250:+	1
Bju-N74	4	Bra021192	3	22.567	1	22	976	996	UAUGAGAGUAUUAUAAAGUCAC	GUGACUU-AUACUACUCUCAUA	Translation	[mRNA] locus=Scaffold000033:821421:822935:+	1
Bju-N75	1	Bra036052	3	19.331	1	22	86	107	GGUGCAACACUGUAGCAGACGG	CUGUUUGCUACGCUGUUGCGUC	Translation	[mRNA] locus=Scaffold000112:284091:284365:-	1
Bju-N75	2	Bra009790	3	21.183	1	20	823	842	GGUGCAACACUGUAGCAGAC	GCUUGCCACAGUGUUGCAUC	Cleavage	[mRNA] locus=Scaffold000009:903410:912075:-	1
Bju-N75	3	Bra036523	3	22.213	1	20	931	950	GGUGCAACACUGUAGCAGAC	GCUUGCCACAGUGUUGCAUC	Cleavage	[mRNA] locus=Scaffold000118:60363:67435:-	1
Bju-N76	1	Bra002296	3	11.839	1	21	1006	1026	GGAAUGUUGUUUGGCUCGAAG	CUUCGAGCCAAGCACUGUUCC	Cleavage	[mRNA] locus=Scaffold000002:2367420:2371416:+	1
Bju-N76	2	Bra016964	2.5	17.368	1	20	749	768	GGAAUGUUGUUUGGCUCGAA	GUGGAGCCAAACAACAUUUC	Cleavage	[mRNA] locus=Scaffold000021:530459:532808:+	1
Bju-N76	3	Bra037319	3	7.418	1	20	304	323	GGAAUGUUGUUUGGCUCGAA	CUCGAGCUUAACAACAUUCU	Cleavage	[mRNA] locus=Scaffold000128:46401:48089:-	1
Bju-N76	4	Bra007091	3	20.584	1	20	427	446	GGAAUGUUGUUUGGCUCGAA	UUCGACUUAAACGACGUUCC	Cleavage	[mRNA] locus=Scaffold000006:1351501:1354604:-	1
Bju-N77	1	Bra007775	3	21.726	1	21	129	149	CCUGCGGAAGGAUCAUUGUCG	CGGCGAUGAUUCUUCCGCCGG	Cleavage	[mRNA] locus=Scaffold000006:4921774:4924335:-	1
Bju-N77	2	Bra032576	3	16.709	1	22	1271	1292	CCUGCGGAAGGAUCAUUGUCGU	GUGACAAGGAUCUUUUCGCAGA	Cleavage	[mRNA] locus=Scaffold000082:738253:741252:-	1
Bju-N77	3	Bra010671	3	18.781	1	20	151	170	CCUGCGGAAGGAUCAUUGUC	UAUAAUGGUCCUUCCGCAGA	Cleavage	[mRNA] locus=Scaffold000010:2672465:2677172:-	1
Bju-N77	4	Bra037306	3	19.641	1	21	249	269	CCUGCGGAAGGAUCAUUGUCG	UGACGAUGAUCUGUUUGCAGG	Translation	[mRNA] locus=Scaffold000128:7141:8923:-	1
Bju-N77	5	Bra010964	3	16.703	1	22	53	73	CCUGCGGAAGGAUCAUUGUCGU	AUGAUGAUGAUCCU-CCGCAGG	Cleavage	[mRNA] locus=Scaffold000010:4085230:4091416:+	1
Bju-N78	1	Bra041148	2.5	23.941	1	21	510	530	GUGUGCUCAGGGCGUCGGCCU	AGGCCGAUGCCCUGAGCAUGA	Cleavage	[mRNA] locus=Scaffold001099:128:1116:+	1
Bju-N80	1	Bra028862	2.5	23.439	1	20	687	706	UUGUGAUCCGAGUGGAGACA	UGUCUCCACUCGGGUUAUGG	Cleavage	[mRNA] locus=Scaffold000063:1054962:1056846:+	1
Bju-N80	2	Bra021250	2.5	16.844	1	20	2205	2224	UUGUGAUCCGAGUGGAGACA	UGUUUCUACUCGGAUCAUGG	Cleavage	[mRNA] locus=Scaffold000033:1194946:1198989:-	1
Bju-N80	3	Bra034626	3	17.501	1	20	588	607	UUGUGAUCCGAGUGGAGACA	UGUCUCCACUCGUGUCAUGG	Cleavage	[mRNA] locus=Scaffold000097:595822:597466:+	1
Bju-N80	4	Bra040649	3	14.765	1	20	2901	2920	UUGUGAUCCGAGUGGAGACA	UGUUGCCACUUGGAUCAUGA	Cleavage	[mRNA] locus=Scaffold000229:51770:56805:+	1
Bju-N80	5	Bra017544	3	12.616	1	20	2764	2783	UUGUGAUCCGAGUGGAGACA	UGCUUCAACUUGGAUCACAA	Cleavage	[mRNA] locus=Scaffold000022:1907056:1912564:-	1
Bju-N81	1	Bra035076	2.5	24.182	1	21	1048	1068	AUGGACAACUAUGGGAAGCAG	CUGUUUCCUCUAGUUGUUCAU	Cleavage	[mRNA] locus=Scaffold000101:334779:338806:+	1
Bju-N81	2	Bra011019	3	14.424	1	22	45	66	AUGGACAACUAUGGGAAGCAGA	UUUGUUUACCAUUGUUGUUCAU	Translation	[mRNA] locus=Scaffold000010:4389575:4390729:+	1
Bju-N81	3	Bra000447	3	23.148	1	22	759	780	AUGGACAACUAUGGGAAGCAGA	UGUUCUUCCCAUGAUUGUUCAU	Translation	[mRNA] locus=Scaffold000001:2399672:2402124:-	1
Bju-N84	1	Bra004292	2.5	14.799	1	21	159	179	AAGAGGGAGAUCGUCGAGGUG	CGCCUCGAAGAUCUCCCUCUC	Cleavage	[mRNA] locus=Scaffold000003:6363425:6364735:-	1
Bju-N84	2	Bra006080	2.5	18.622	1	20	386	405	AAGAGGGAGAUCGUCGAGGU	UCCUCGACAAUCUUCCUCUU	Cleavage	[mRNA] locus=Scaffold000005:1895451:1898088:+	1
Bju-N84	3	Bra031766	2.5	15.74	1	20	3803	3822	AAGAGGGAGAUCGUCGAGGU	ACCUCAAAGAUCUUCCUCUU	Cleavage	[mRNA] locus=Scaffold000077:1116798:1123655:+	1
Bju-N84	4	Bra035181	3	11.938	1	20	1547	1566	AAGAGGGAGAUCGUCGAGGU	AUCUUGCUGAUCUCUCUCUU	Cleavage	[mRNA] locus=Scaffold000101:761233:763278:+	1
Bju-N84	5	Bra008472	3	18.773	1	20	1325	1344	AAGAGGGAGAUCGUCGAGGU	AUCUUGCUGAUCUCUCUCUU	Cleavage	[mRNA] locus=Scaffold000007:4479613:4481679:+	1
Bju-N84	6	Bra027726	3	14.277	1	20	143	163	AAGAGGGAG-AUCGUCGAGGU	ACUUCGACGAUGCUCUCUCUU	Translation	[mRNA] locus=Scaffold000057:793718:795250:+	1
Bju-N85	1	Bra030130	3	22.356	1	20	944	963	AAGUGGAUCGAAGCCGAGGC	GCCUCGGUUUUGAUCCGUUG	Cleavage	[mRNA] locus=Scaffold000069:753270:755808:-	1
Bju-N85	2	Bra014629	3	24.122	1	20	209	228	AAGUGGAUCGAAGCCGAGGC	ACCUUGGCUUCGAUCCCCUU	Cleavage	[mRNA] locus=Scaffold000016:1655494:1656954:+	1
Bju-N85	3	Bra031427	3	24.831	1	20	218	237	AAGUGGAUCGAAGCCGAGGC	ACUUCGGAUUCGAUCCGCUU	Cleavage	[mRNA] locus=Scaffold000076:352927:353924:-	1
Bju-N86	1	Bra035172	2.5	7.768	1	20	569	588	GCAGGGGCGGACGCAAGACA	UGUAUUUCGUCCGCCCCUGU	Cleavage	[mRNA] locus=Scaffold000101:734956:736917:+	1
Bju-N86	2	Bra018659	3	4.933	1	20	1819	1838	GCAGGGGCGGACGCAAGACA	UGUCUUGCUACCCCCCCUGC	Translation	[mRNA] locus=Scaffold000026:425589:431237:-	1
Bju-N87	1	Bra011965	3	20.424	1	20	534	553	UUGUGCAAGACUAAGAAGCA	UGCUUCUUUGUUUUGCGUGA	Cleavage	[mRNA] locus=Scaffold000012:560422:562107:-	1
Bju-N87	2	Bra028731	3	5.491	1	21	125	145	UUGUGCAAGACUAAGAAGCAA	UCGCUUCUUAUUAUUGCACAA	Translation	[mRNA] locus=Scaffold000063:429743:430336:+	1
Bju-N87	3	Bra016084	3	21.067	1	20	1410	1429	UUGUGCAAGACUAAGAAGCA	UGCUUCUGAGGCUUGCACAC	Translation	[mRNA] locus=Scaffold000019:2202551:2204612:-	1
Bju-N87	4	Bra016636	3	15.425	1	20	1325	1344	UUGUGCAAGACUAAGAAGCA	UGUUUCUAAGUAUUGCACGA	Translation	[mRNA] locus=Scaffold000020:1735554:1739018:-	1
Bju-N89	1	Bra035774	2.5	14.477	1	21	907	927	GUUGGUGGAGCGAUUUGUCUG	CAGAUAGAUCCCUUCACCAAC	Translation	[mRNA] locus=Scaffold000109:285071:289711:-	1
Bju-N91	1	Bra005206	3	22.989	1	20	1317	1336	AAGGUCUGGUGGAAGCCCAU	AUGGGCUGACAUUAGACCUU	Cleavage	[mRNA] locus=Scaffold000004:4003348:4010037:+	1
Bju-N93	1	Bra034604	3	18.188	1	20	437	456	AGGGCGUAGACGCGUAGUAC	GUAAUACGCCUCUGUGCCCU	Translation	[mRNA] locus=Scaffold000097:447552:448031:+	1
Bju-N94	1	Bra006779	2.5	18.311	1	20	982	1001	UUGGCUGGGGCGGCACCUCU	GGAGGUGCGGCUUCAGCCAA	Cleavage	[mRNA] locus=Scaffold000005:5021027:5022502:-	1
Bju-N94	2	Bra035304	3	23.053	1	20	889	908	UUGGCUGGGGCGGCACCUCU	AAAGGUGCCGCUUUGGCCAA	Cleavage	[mRNA] locus=Scaffold000103:182129:187695:-	1
Bju-N95	1	Bra001061	3	19.906	1	20	195	214	AGGCCAAGGAAGUUUGAGGC	GACUCGAGCUUCCUUGGCCG	Cleavage	[mRNA] locus=Scaffold000001:5794297:5797134:-	1
Bju-N96	1	Bra005832	2	19.956	1	21	134	154	UGUUACUGUUAACUGCGGUGC	GCACCGCAGCUAACAGUAGCG	Cleavage	[mRNA] locus=Scaffold000005:836974:838987:+	1
Bju-N96	2	Bra023348	2.5	20.758	1	20	78	97	UGUUACUGUUAACUGCGGUG	CACUGCCGUUAACGGUAACG	Cleavage	[mRNA] locus=Scaffold000041:188701:191765:+	1
Bju-N96	3	Bra000274	3	15.738	1	20	876	895	UGUUACUGUUAACUGCGGUG	CACUGCAGUUAAAAGGAACA	Cleavage	[mRNA] locus=Scaffold000001:1511781:1513894:+	1
Bju-N96	4	Bra032532	2.5	14.25	1	20	1845	1864	UGUUACUGUUAACUGCGGUG	CACCGCAGAAAGCAGUAACA	Translation	[mRNA] locus=Scaffold000082:524908:530232:-	1
Bju-N97	1	Bra011750	2.5	17.766	1	21	1762	1782	AUGAAGAGCGGCAUGAACGAA	UUCGUUCAUGCUGCUCUUUCU	Cleavage	[mRNA] locus=Scaffold000011:3631621:3635590:-	1
Bju-N97	2	Bra021557	3	18.56	1	20	115	134	AUGAAGAGCGGCAUGAACGA	CUGUUCGUGCUGUUCUUCAU	Cleavage	[mRNA] locus=Scaffold000034:1783535:1783842:-	1
Bju-N97	3	Bra035648	3	14.717	1	20	1835	1854	AUGAAGAGCGGCAUGAACGA	UCGUUCAGGCUGCUCUUCCU	Cleavage	[mRNA] locus=Scaffold000107:675998:679741:+	1
Bju-N97	4	Bra006834	3	18.42	1	20	1778	1797	AUGAAGAGCGGCAUGAACGA	UCGUUCAGGCUGCUCUUCCU	Cleavage	[mRNA] locus=Scaffold000005:5266421:5270315:-	1
Bju-N97	5	Bra002763	3	13.577	1	20	1637	1656	AUGAAGAGCGGCAUGAACGA	UCGUUCAGGCUGCUCUUCCU	Cleavage	[mRNA] locus=Scaffold000002:5048206:5051895:-	1
Bju-N97	6	Bra008941	3	14.725	1	20	625	644	AUGAAGAGCGGCAUGAACGA	UCGUGCAUACCGCUCUUCAA	Cleavage	[mRNA] locus=Scaffold000008:1699962:1701350:-	1
Bju-N97	7	Bra029333	3	18.498	1	20	1361	1380	AUGAAGAGCGGCAUGAACGA	UCGCUCAAGCUGCUUUUCAU	Cleavage	[mRNA] locus=Scaffold000065:780134:792812:-	1
Bju-N97	8	Bra011367	3	19.098	1	20	974	993	AUGAAGAGCGGCAUGAACGA	UUGUCCAUGGCGCUCUUCGU	Translation	[mRNA] locus=Scaffold000011:1851690:1855384:-	1
Bju-N98	1	Bra016969	3	15.014	1	21	18	38	GCGGUUGGUAACGGUUGACAG	CCGACAACCGCUACCAACCGC	Translation	[mRNA] locus=Scaffold000021:553375:555457:+	1
Bju-N99	1	Bra032189	2	18.266	1	20	623	642	UAAGUUGUCUGGACGACUAG	CUGUUCGUCCAGACGACUUA	Cleavage	[mRNA] locus=Scaffold000079:1205314:1210350:-	1
Bju-N99	2	Bra012288	3	19.602	1	21	2944	2964	UAAGUUGUCUGGACGACUAGU	ACUCCUCGUUCAGACAACUUG	Cleavage	[mRNA] locus=Scaffold000012:2654462:2659961:+	1
Bju-N99	3	Bra016413	3	19.963	1	21	2971	2991	UAAGUUGUCUGGACGACUAGU	ACUCCUCGUUCAGACAACUUG	Cleavage	[mRNA] locus=Scaffold000020:704098:709704:-	1
Bju-N100	1	Bra018963	3	24.847	1	21	2090	2110	UCGCCUGGUGCAGGUCGGGAA	UUCCCGAGCUGUUUCAGGCGA	Translation	[mRNA] locus=Scaffold000026:2192903:2195960:+	1
Bju-N100	2	Bra013942	3	20.76	1	20	441	460	UCGCCUGGUGCAGGUCGGGA	UCCGAGCCUGCGCCAGGCGA	Cleavage	[mRNA] locus=Scaffold000014:4033284:4036061:+	1
Bju-N101	1	Bra001109	2	20.579	1	20	94	113	GAAGUGUUCUGAUCGCGGCG	CGCCGUGAUUGGAACACUUU	Cleavage	[mRNA] locus=Scaffold000001:6023205:6023777:-	1
Bju-N101	2	Bra040188	2	21.811	1	20	106	125	GAAGUGUUCUGAUCGCGGCG	CGCCGUGAUUGGAACACUUU	Cleavage	[mRNA] locus=Scaffold000191:19083:19676:+	1
Bju-N101	3	Bra040137	2	15.233	1	20	115	134	GAAGUGUUCUGAUCGCGGCG	CGCCGUGAUUGGAACACUUU	Cleavage	[mRNA] locus=Scaffold000189:101503:104459:+	1
Bju-N101	4	Bra033113	3	20.382	1	20	759	778	GAAGUGUUCUGAUCGCGGCG	CGUCGCGAUCGGAGCAUUUG	Cleavage	[mRNA] locus=Scaffold000085:1122628:1124910:+	1
Bju-N101	5	Bra013330	3	13.445	1	20	136	155	GAAGUGUUCUGAUCGCGGCG	CGCCGCGAUUGGAACACGUU	Cleavage	[mRNA] locus=Scaffold000014:476832:477422:+	1
Bju-N101	6	Bra010997	2.5	19.293	1	20	912	931	GAAGUGUUCUGAUCGCGGCG	UGCUGCUAUUAGAACACUUC	Cleavage	[mRNA] locus=Scaffold000010:4284235:4286399:-	1
Bju-N101	7	Bra012360	3	14.72	1	20	1174	1193	GAAGUGUUCUGAUCGCGGCG	CGUCGGGAUCAAAACGCUUC	Translation	[mRNA] locus=Scaffold000012:3244037:3246246:-	1
Bju-N103	1	Bra012445	3	13.083	1	21	923	943	GCGGUUGAUAGCGGUUGACAG	CUGUUAAACGCUAUCAACUGA	Cleavage	[mRNA] locus=Scaffold000012:3897971:3902347:-	1
Bju-N103	2	Bra036384	2.5	20.404	1	20	865	884	GCGGUUGAUAGCGGUUGACA	UGUCAACCGCCAUCAACAGC	Translation	[mRNA] locus=Scaffold000116:66381:73724:-	1
Bju-N103	3	Bra033662	2.5	17.656	1	21	434	453	GCGGUUGAUAGCGGUUGACAG	CUGUUAACC-CUAUCAACCGC	Cleavage	[mRNA] locus=Scaffold000089:513910:518385:-	1
Bju-N103	4	Bra016969	3	15.014	1	21	18	38	GCGGUUGAUAGCGGUUGACAG	CCGACAACCGCUACCAACCGC	Cleavage	[mRNA] locus=Scaffold000021:553375:555457:+	1
Bju-N104	1	Bra012670	2.5	18.332	1	20	80	99	AGGGGUGGACACGGAUCGAA	AUCGAUCCGUCUCCAUCCCU	Translation	[mRNA] locus=Scaffold000013:1072008:1074128:-	1
Bju-N104	2	Bra000788	3	19.709	1	20	2081	2100	AGGGGUGGACACGGAUCGAA	UUUGUUCCGUCUUCACCCCU	Translation	[mRNA] locus=Scaffold000001:4337784:4347076:+	1
Bju-N104	3	Bra039469	3	9.489	1	20	38	57	AGGGGUGGACACGGAUCGAA	UGCUGUCCGUGUCCACCUCU	Cleavage	[mRNA] locus=Scaffold000165:273922:276965:+	1
Bju-N104	4	Bra007287	3	19.709	1	20	644	663	AGGGGUGGACACGGAUCGAA	UUUGUUCCGUCUUCACCCCU	Translation	[mRNA] locus=Scaffold000006:2470070:2471328:-	1
Bju-N104	5	Bra028882	3	17.85	1	20	46	65	AGGGGUGGACACGGAUCGAA	UUCGAGUCGUCUCCACCUCU	Translation	[mRNA] locus=Scaffold000063:1158796:1160319:-	1
Bju-N105	1	Bra006090	3	23.918	1	20	387	406	UCGGAAACUCGCUAGGCGCA	UGUGCCUGGUGAGAUUCCGA	Cleavage	[mRNA] locus=Scaffold000005:1946332:1950683:+	1
Bju-N105	2	Bra030564	3	24.019	1	20	735	754	UCGGAAACUCGCUAGGCGCA	UGGGCCUGGUGGGUUUUCGA	Cleavage	[mRNA] locus=Scaffold000072:293158:301485:-	1
Bju-N106	1	Bra039466	2	20.631	1	21	984	1004	ACUUCGUGAUGACCUGGCAUA	UAUGCCAGGUCGUAACGAGGU	Cleavage	[mRNA] locus=Scaffold000165:262882:265507:+	1
Bju-N106	2	Bra027610	2	15.859	1	20	1	20	ACUUCGUGAUGACCUGGCAU	AUGCCAAGUCAUCACGAAGA	Cleavage	[mRNA] locus=Scaffold000057:1853:2230:+	1
Bju-N107	1	Bra015177	2.5	17.966	1	20	488	507	AGCCAAGGAUGACUUGCCGA	UCGGCAAAUCAUCUUUGGCA	Cleavage	[mRNA] locus=Scaffold000017:3099161:3100081:-	1
Bju-N108	1	Bra015659	3	23.422	1	20	816	835	AUGGAGUUGGGUUGGAGCAU	CAUCUCCAACCCAACUCCAU	Cleavage	[mRNA] locus=Scaffold000019:216952:218399:-	1
Bju-N108	2	Bra025353	2.5	10.598	1	20	41	60	AUGGAGUUGGGUUGGAGCAU	CUUCUUCAACCCAACUCCAU	Cleavage	[mRNA] locus=Scaffold000047:1340354:1342368:-	1
Bju-N108	3	Bra011396	2.5	9.027	1	20	3856	3875	AUGGAGUUGGGUUGGAGCAU	CUGCUCCAACUCUACUCCAU	Cleavage	[mRNA] locus=Scaffold000011:2014358:2021220:-	1
Bju-N108	4	Bra004009	3	4.259	1	20	238	257	AUGGAGUUGGGUUGGAGCAU	AUGCUUCAACCUAAUCCCAU	Cleavage	[mRNA] locus=Scaffold000003:4826022:4826294:-	1
Bju-N108	5	Bra003481	3	14.511	1	20	1241	1260	AUGGAGUUGGGUUGGAGCAU	AUCCUCCAACCAAACUCCAA	Translation	[mRNA] locus=Scaffold000003:1956811:1959632:-	1
Bju-N109	1	Bra000402	1.5	14.394	1	20	78	97	UGAAUGUCUUUCUCUUCAUC	GGUGAAGAGAAAGACAUUCU	Cleavage	[mRNA] locus=Scaffold000001:2167782:2168390:-	1
Bju-N109	2	Bra004936	1.5	14.13	1	20	78	97	UGAAUGUCUUUCUCUUCAUC	GGUGAAGAGAAAGACAUUCU	Cleavage	[mRNA] locus=Scaffold000004:2564984:2565589:-	1
Bju-N109	3	Bra004217	3	17.766	1	20	2743	2762	UGAAUGUCUUUCUCUUCAUC	AGUGAAGAGGAAGACAUUCU	Cleavage	[mRNA] locus=Scaffold000003:6027026:6031871:-	1
Bju-N109	4	Bra028900	3	23.495	1	20	2059	2078	UGAAUGUCUUUCUCUUCAUC	GAUGAAGAGAAAGACAGUUU	Cleavage	[mRNA] locus=Scaffold000063:1253437:1261705:-	1
Bju-N109	5	Bra028993	2.5	18.439	1	20	838	857	UGAAUGUCUUUCUCUUCAUC	GAUGAAGAGAGACACAUUCC	Cleavage	[mRNA] locus=Scaffold000064:342909:346937:-	1
Bju-N109	6	Bra039847	2.5	20.547	1	20	795	814	UGAAUGUCUUUCUCUUCAUC	GUUGAAGAGGAAGACAUUCU	Cleavage	[mRNA] locus=Scaffold000178:212671:213579:-	1
Bju-N109	7	Bra008276	3	5.121	1	20	3289	3308	UGAAUGUCUUUCUCUUCAUC	GAUGAAGAGAAAGACACUGA	Cleavage	[mRNA] locus=Scaffold000007:2902044:2913658:+	1
Bju-N109	8	Bra011429	3	18.418	1	20	5116	5135	UGAAUGUCUUUCUCUUCAUC	GAUGAAGAGAGAGACGAUCG	Cleavage	[mRNA] locus=Scaffold000011:2160740:2167338:-	1
Bju-N109	9	Bra038327	3	18.995	1	20	382	401	UGAAUGUCUUUCUCUUCAUC	GAUGGGGAGGAAGAUGUUUA	Cleavage	[mRNA] locus=Scaffold000144:143560:147331:+	1
Bju-N109	10	Bra015815	3	7.863	1	20	1315	1334	UGAAUGUCUUUCUCUUCAUC	GAUGAAGAGGAAGAAGUUUA	Cleavage	[mRNA] locus=Scaffold000019:993696:996280:+	1
Bju-N109	11	Bra006524	2.5	11.952	1	20	1120	1139	UGAAUGUCUUUCUCUUCAUC	GAUGAAGCGAAAGAGAUUCA	Cleavage	[mRNA] locus=Scaffold000005:3906165:3907361:-	1
Bju-N109	12	Bra039316	2.5	15.946	1	20	78	97	UGAAUGUCUUUCUCUUCAUC	GGUGAAGAGGCAGACAUUCG	Translation	[mRNA] locus=Scaffold000163:235070:235687:+	1
Bju-N109	13	Bra015739	3	16.109	1	20	1429	1448	UGAAUGUCUUUCUCUUCAUC	AAUGACGGGAAAGAUAUUCA	Cleavage	[mRNA] locus=Scaffold000019:628332:630276:-	1
Bju-N110	1	Bra002768	3	11.489	1	21	503	523	UUAUUUGAUAUUUGGCAAUAG	UUAUUGCCAAAGAUCGAGUAC	Translation	[mRNA] locus=Scaffold000002:5077074:5080556:-	1
Bju-N110	2	Bra033288	3	15.9	1	21	1658	1678	UUAUUUGAUAUUUGGCAAUAG	CUACUGCCAGGAAUCAAAUAA	Translation	[mRNA] locus=Scaffold000087:373684:377413:-	1
Bju-N110	3	Bra003718	2.5	19.391	1	19	160	179	UUAU-UUGAUAUUUGGCAAU	AUUGCCAAAUAUCAAGAUAA	Cleavage	[mRNA] locus=Scaffold000003:3230570:3231132:+	1
Bju-N110	4	Bra027442	3	9.846	1	21	778	797	UUAUUUGAUAUUUGGCAAUAG	UUAUUGCUAAAU-UCAGAUAA	Translation	[mRNA] locus=Scaffold000056:48581:49697:+	1
Bju-N112	1	Bra040948	2	12.963	1	20	131	150	AGUAGGAGUGAGAGCUGGCU	AGCCAGUUCCUACUCCUACU	Translation	[mRNA] locus=Scaffold000327:16885:17676:-	1
Bju-N112	2	Bra005576	2	18.174	1	20	1315	1334	AGUAGGAGUGAGAGCUGGCU	AGCCACUUCUCACUCCUGCU	Cleavage	[mRNA] locus=Scaffold000004:6298856:6301728:-	1
Bju-N112	3	Bra037623	2	19.532	1	20	1324	1343	AGUAGGAGUGAGAGCUGGCU	AGCCACUUCUCACUCUUACU	Cleavage	[mRNA] locus=Scaffold000131:407647:410311:-	1
Bju-N112	4	Bra013818	3	23.632	1	20	1970	1989	AGUAGGAGUGAGAGCUGGCU	CGCCAGCACUUACUCCUGCU	Cleavage	[mRNA] locus=Scaffold000014:3370892:3377605:-	1
Bju-N112	5	Bra035938	2.5	15.88	1	20	191	210	AGUAGGAGUGAGAGCUGGCU	AGCAAGCUCUCUCUUCUACU	Translation	[mRNA] locus=Scaffold000110:545594:550583:-	1
Bju-N112	6	Bra010048	3	18.717	1	20	1166	1185	AGUAGGAGUGAGAGCUGGCU	AGCCAGCUCUUUCUCCUCCU	Translation	[mRNA] locus=Scaffold000009:2498953:2502671:+	1
Bju-N113	1	Bra033573	2.5	19.16	1	20	518	537	GUUGGGACUAGAAGGGACGC	AUGUUCCUUCUGGUCCCAAC	Cleavage	[mRNA] locus=Scaffold000089:111344:113342:-	1
Bju-N113	2	Bra026973	2.5	17.109	1	20	389	408	GUUGGGACUAGAAGGGACGC	CCGUCCCUUCUCGUCUCAAC	Translation	[mRNA] locus=Scaffold000053:1397786:1400029:+	1
Bju-N113	3	Bra011848	2.5	22.501	1	20	1496	1515	GUUGGGACUAGAAGGGACGC	GCGAGUCUUCUAGUCCCAAC	Cleavage	[mRNA] locus=Scaffold000011:4125566:4128044:-	1
Bju-N113	4	Bra013868	3	17.009	1	20	605	624	GUUGGGACUAGAAGGGACGC	GUGGUUCUUCUGGUCCCAAC	Cleavage	[mRNA] locus=Scaffold000014:3585204:3588707:-	1
Bju-N114	1	Bra031981	3	15.17	1	20	934	953	AGGGCUGGACGCGGAUCGGA	UUUGAUUCGCGUCCGGUCUU	Cleavage	[mRNA] locus=Scaffold000078:1033138:1035014:+	1
Bju-N114	2	Bra026966	3	8.836	1	21	51	71	AGGGCUGGACGCGGAUCGGAU	AUCGGAUCCGCUUCCAGUCUU	Translation	[mRNA] locus=Scaffold000053:1369606:1370477:-	1
Bju-N114	3	Bra008084	3	17.583	1	20	306	325	AGGGCUGGACGCGGAUCGGA	UCCGACCUGCGUUCAGUCUU	Cleavage	[mRNA] locus=Scaffold000007:1676661:1677284:+	1
Bju-N116	1	Bra004883	3	20.075	1	21	502	522	GUGGACUGUCCAAUGGUCACA	UGUGAUCAUUGCAUGGUUCAC	Translation	[mRNA] locus=Scaffold000004:2287086:2288787:+	1
Bju-N117	1	Bra034778	2.5	23.473	1	21	786	806	ACCGGGGACGGCUGGAAACGG	UCUUUUCCAGCCGUCUUUGGU	Cleavage	[mRNA] locus=Scaffold000098:448567:450289:-	1
Bju-N117	2	Bra039326	3	18.501	1	21	33	53	ACCGGGGACGGCUGGAAACGG	CCGUUUCCAGACGCUUCCGGU	Translation	[mRNA] locus=Scaffold000163:274941:277112:-	1
Bju-N118	1	Bra001425	1.5	13.624	1	20	1164	1183	AUGGACCGAGCGACGUGAGG	CCUCACGCUGCUCGGUCCAU	Cleavage	[mRNA] locus=Scaffold000001:7542961:7545099:+	1
Bju-N118	2	Bra034803	2.5	12.648	1	20	1167	1186	AUGGACCGAGCGACGUGAGG	CCUCACUCUGCUCGGUCCAU	Cleavage	[mRNA] locus=Scaffold000098:567598:569927:-	1
Bju-N118	3	Bra039781	3	22.749	1	20	177	196	AUGGACCGAGCGACGUGAGG	CUUCGCGUUCCUCGGUCCGU	Translation	[mRNA] locus=Scaffold000177:34074:35069:+	1
Bju-N118	4	Bra039784	3	23.238	1	20	177	196	AUGGACCGAGCGACGUGAGG	CUUCGCGUUCCUCGGUCCGU	Translation	[mRNA] locus=Scaffold000177:42267:42503:+	1
Bju-N119	1	Bra027093	3	15.123	1	20	9	28	AAGUGUUCGGAUCGUGGCGA	UCGCUAUGAUCCGAAUCCUU	Cleavage	[mRNA] locus=Scaffold000054:995879:998084:-	1
Bju-N119	2	Bra011866	3	16.412	1	20	336	355	AAGUGUUCGGAUCGUGGCGA	UUGCCAUGAUCCAAACACUA	Cleavage	[mRNA] locus=Scaffold000011:4224386:4224778:+	1
Bju-N119	3	Bra031780	3	18.039	1	20	1434	1453	AAGUGUUCGGAUCGUGGCGA	UAGCCAUGGUCCGAAUGCUU	Cleavage	[mRNA] locus=Scaffold000077:1180791:1182407:+	1
Bju-N119	4	Bra009051	3	18.209	1	20	945	964	AAGUGUUCGGAUCGUGGCGA	GCUCCAAGAUCCGAACACUU	Cleavage	[mRNA] locus=Scaffold000008:2230697:2232701:-	1
Bju-N122	1	Bra026005	3	13.049	1	21	718	738	AGGGAUGGGCACGGAACGGAU	AUUCGUUCCGUCUACAUCCCU	Translation	[mRNA] locus=Scaffold000050:567857:570813:+	1
Bju-N122	2	Bra031386	3	21.046	1	20	206	225	AGGGAUGGGCACGGAACGGA	UCCGUUUUGAGUCUAUCCCU	Translation	[mRNA] locus=Scaffold000075:1229039:1230856:-	1
Bju-N123	1	Bra010258	1	19.369	1	20	1605	1624	GCAAGUGGAGCGGUCGAACA	UGUUCGACAGCUCCACUUGC	Cleavage	[mRNA] locus=Scaffold000010:255101:259561:-	1
Bju-N123	2	Bra038485	2	20.55	1	20	269	288	GCAAGUGGAGCGGUCGAACA	UGUUCGACCGCUUCACUUAC	Cleavage	[mRNA] locus=Scaffold000147:247763:248635:-	1
Bju-N125	1	Bra011959	3	19.914	1	22	545	566	UUUGCCUCUAUAAAUAGAGGAA	UUCGUCUUUUUAAAGAGGCAAA	Translation	[mRNA] locus=Scaffold000012:498007:502161:-	1
Bju-N125	2	Bra018180	3	21.751	1	21	2220	2240	UUUGCCUCUAUAAAUAGAGGA	UCCUCGAUUUGAAGAGGCGAA	Translation	[mRNA] locus=Scaffold000024:2083643:2087991:+	1
Bju-N125	3	Bra014933	2.5	10.69	1	22	15	36	UUUGCCUCUAUAAAUAGAGGAA	UCUCUCUAUUGACAGAGGCAAA	Translation	[mRNA] locus=Scaffold000017:647568:648578:-	1
Bju-N127	1	Bra011777	2	1.506	1	21	261	281	UGGGCUGGAGUAGUGGAAGGA	UCCUUUCACUACUCCCGCCCA	Cleavage	[mRNA] locus=Scaffold000011:3768585:3770186:+	1
Bju-N127	2	Bra030627	2.5	15.26	1	21	619	639	UGGGCUGGAGUAGUGGAAGGA	UCUUUCAACUACUCUAGCUCA	Cleavage	[mRNA] locus=Scaffold000072:574058:575577:+	1
Bju-N127	3	Bra029530	3	20.249	1	21	639	659	UGGGCUGGAGUAGUGGAAGGA	UCCUUUUACUGCUCUAGCUUA	Cleavage	[mRNA] locus=Scaffold000066:939953:947344:+	1
Bju-N127	4	Bra015880	3	13.255	1	21	507	527	UGGGCUGGAGUAGUGGAAGGA	UGCUUCCACUACUCCAGUUCC	Cleavage	[mRNA] locus=Scaffold000019:1331402:1332550:+	1
Bju-N127	5	Bra026687	3	24.616	1	21	876	896	UGGGCUGGAGUAGUGGAAGGA	UUCUUCGACUACUCCAGCUCU	Cleavage	[mRNA] locus=Scaffold000053:69042:70941:-	1
Bju-N127	6	Bra021402	3	6.314	1	20	527	546	UGGGCUGGAGUAGUGGAAGG	CUUUCUAUUUCUCUAGCCCA	Translation	[mRNA] locus=Scaffold000034:961022:961961:+	1
Bju-N127	7	Bra036224	3	15.455	1	21	216	236	UGGGCUGGAGUAGUGGAAGGA	UGCUCACACUACUCCAGCCCA	Cleavage	[mRNA] locus=Scaffold000113:601132:601638:-	1
Bju-N130	1	Bra013444	2.5	19.636	1	20	340	359	AACUCACGGUGGAAGGGACU	GGUCUCUACCACCGUGGGUU	Cleavage	[mRNA] locus=Scaffold000014:1140492:1142327:-	1
Bju-N130	2	Bra024894	2.5	17.967	1	20	1542	1561	AACUCACGGUGGAAGGGACU	AGUUUCUUCUACAGUGAGUU	Cleavage	[mRNA] locus=Scaffold000046:771320:773338:+	1
Bju-N130	3	Bra007418	3	21.715	1	20	1441	1460	AACUCACGGUGGAAGGGACU	UGUCCCUUCCCCGGUGAGUU	Translation	[mRNA] locus=Scaffold000006:3182763:3188839:+	1
Bju-N130	4	Bra005833	3	15.558	1	20	1747	1766	AACUCACGGUGGAAGGGACU	AUUCCCUUCUACGGUGGGUU	Cleavage	[mRNA] locus=Scaffold000005:839749:842767:-	1
Bju-N131	1	Bra030891	2.5	18.387	1	21	372	392	ACCGAUCGUUGGAACGGGAUG	CAUCUCGUACCAAAGAUCGGU	Cleavage	[mRNA] locus=Scaffold000073:581844:582476:+	1
Bju-N131	2	Bra000990	3	24.633	1	20	1183	1202	ACCGAUCGUUGGAACGGGAU	CUCCUGUUCCGACGGUUGGU	Cleavage	[mRNA] locus=Scaffold000001:5518676:5521747:-	1
Bju-N131	3	Bra040022	3	24.624	1	20	733	752	ACCGAUCGUUGGAACGGGAU	AUCCUGUUCUCACGGUUGGU	Translation	[mRNA] locus=Scaffold000186:37232:40073:+	1
Bju-N132	1	Bra030556	3	13.079	1	21	469	489	AGUUUGUGGAUGCGGACGGUU	AGCUGUCCGCAACCACAAACA	Translation	[mRNA] locus=Scaffold000072:254190:259201:+	1
Bju-N132	2	Bra003742	3	14.066	1	20	181	200	AGUUUGUGGAUGCGGACGGU	UCCGUUCUCAUCUACAAACU	Cleavage	[mRNA] locus=Scaffold000003:3353503:3354736:+	1
Bju-N132	3	Bra015819	3	17.342	1	20	181	200	AGUUUGUGGAUGCGGACGGU	UCCGUUCUCAUCUACAAACU	Cleavage	[mRNA] locus=Scaffold000019:1012069:1013202:+	1
Bju-N133	4	Bra039949	1.5	16.89	1	20	630	649	AUGGUGACACGUGGCUACAA	UUUUAGCCACGUGUCAUCAU	Cleavage	[mRNA] locus=Scaffold000183:62455:65216:-	1
Bju-N133	5	Bra035381	3	14.591	1	20	830	849	AUGGUGACACGUGGCUACAA	UUGUAUCCACCUUUCACCAU	Translation	[mRNA] locus=Scaffold000104:410189:414705:+	1
Bju-N134	1	Bra022700	3	20.715	1	20	825	844	GAAGCGAUUUGUAGCGGUUU	GAACUGCUACAAGGCGCUUC	Cleavage	[mRNA] locus=Scaffold000038:1683463:1685325:+	1
Bju-N134	2	Bra005778	2.5	15.274	1	20	560	579	GAAGCGAUUUGUAGCGGUUU	AAACCGUUUCACAUCGCUUC	Translation	[mRNA] locus=Scaffold000005:561986:567269:-	1
Bju-N135	1	Bra021844	3	17.661	1	20	863	882	AACAGCGGAUUGAGCGGUGC	GUACUUCUCAAUCUGUUGUU	Cleavage	[mRNA] locus=Scaffold000035:1528884:1532192:-	1
Bju-N136		Bra016163	2	24.512	1	20	731	750	UUUGCGGUUGCGGACGGUUA	UAACCGUCCGCCGCCGCAAG	Translation	[mRNA] locus=Scaffold000019:2602396:2604795:+	1
Bju-N136	1	Bra030752	3	24.578	1	20	256	275	UUUGCGGUUGCGGACGGUUA	CAGCCGUUUGUAACCGCAAA	Cleavage	[mRNA] locus=Scaffold000072:1096488:1100522:-	1
Bju-N136	2	Bra033641	3	13.797	1	20	121	140	UUUGCGGUUGCGGACGGUUA	CCACCGUCCGCCACCGCAAA	Translation	[mRNA] locus=Scaffold000089:419437:422241:+	1
Bju-N136	3	Bra024259	3	24.524	1	20	306	325	UUUGCGGUUGCGGACGGUUA	UUACCGUUGGCAACCGCAAG	Cleavage	[mRNA] locus=Scaffold000044:118267:119747:-	1
